# Supplementary material for: Comparisons of stemflow yield and efficiency between two xerophytic shrubs: the effects of leaves and implications in drought tolerance
Source: Copernicus journal article supplement (doi:10.5194/hess-2016-420), 2016-08-31
Supplement: Supplementary file [file hess-2016-420-AC1-supplement.pdf]

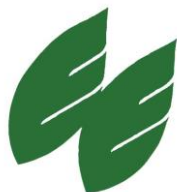

中国科学院生态环境研究中心

Research Center for Eco-Environmental Science  
Chinese Academy of Sciences (CAS)

北京市海淀区双清路 18 号 邮编: 100085 Website: www.rcees.ac.cn

#18 Shuangqing Road, Haidian District, Beijing 100085, P. R. China

Tel: 0086-10-62911239 Email: gygao@rcees.ac.cn

---

November 23, 2016

Memorandum

To: Prof. Lixin Wang, Editor of *Hydrology and Earth System Science*

Subject: **Revision of hess-2016-420**

Dear Prof. Wang,

We have substantially revised our manuscript entitled as “Comparisons of stemflow yield and efficiency between two xerophytic shrubs: the effects of leaves and implications in drought tolerance” after considering all the comments made by Prof. David Dunkerley and another anonymous reviewer. These comments were of great help to improve the overall quality of this manuscript.

The following are the general reply and point-to-point response to all the comments, including (1) Response to Reviewer #1 (Prof. David Dunkerley), (2) Response to Reviewer #2, (3) Revised manuscript with changes marked, and (4) the revised manuscript with no changes marked, respectively.

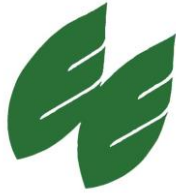

中国科学院生态环境研究中心  
Research Center for Eco-Environmental Science  
Chinese Academy of Sciences (CAS)

北京市海淀区双清路 18 号 邮编: 100085 Website: www.rcees.ac.cn  
#18 Shuangqing Road, Haidian District, Beijing 100085, P. R. China  
Tel: 0086-10-62911239 Email: gygao@rcees.ac.cn

---

**Response to Reviewer #1, Prof. David Dunkerley:**

**General reply:**

**R1C1:** This paper reports field data on stemflow volumes from a dryland field site in China, collected over two successive annual wet seasons. The paper is systematically presented, though rather too long in light of the scope and volume of the primary data that are presented. The field data are of interest because they include stemflow measurements at the scale of individual branches.

**Reply:**

Thank you for your constructive advices and the “minor revision” recommendation for this manuscript, which has been revised from the following aspects.

1) Some speculative discussion has been deleted in the revised version, and the focus of this work has been shifted to interpret and discuss the measured stemflow data (see Reply to R1C10, please).

2) To explain leaf’s effects affecting stemflow yield, a direct evidence has been provided with a controlled experiment of comparing stemflow yield between the foliated and manually defoliated shrubs during the 2015 rainy season (in P.11, Line 235–251, in P.18, Line 433–447, in P.31, Line 758–778, in P.33, Line 812–820 and P.50, Line 1107–1110).

3) To demonstrate the effectiveness in analyzing the abiotic influential factors on stemflow yield and efficiency, more critical meteorological characteristics have been added, including the air temperature, air relative humidity, wind speed and solar radiation in P.9, Line 196–201, in P.14, Line 324–334, and from P.21, Line 529–535.

**Reply for comments on Introduction:**

**R1C2:** I felt that the authors needed some evidence to support their repeated claims (e.g. line 58-59) that stemflow exerts a high influence on the survival of dryland shrubs, especially under drought conditions (e.g. line 107 refers to ‘...a novel characterization of plant drought tolerance....’ as one of the outcomes proposed for the present study).

**Reply:**

Thank you for this comment. New references have been cited as required to support the claim that “stemflow exerts a high influence on the survival of dryland shrubs, especially under drought conditions” in P.4, Line 72–78.

Besides, we have deleted the claim for “a novel characterization of plant drought tolerance”, and re-addressed the research objectives and outcomes in P.7, Line 139–142: “The achievement of these research objectives would advance our understanding of the ecological importance of



stemflow for dryland shrubs and the significance of leaves from an eco-hydrological perspective”.

### **Reply for comments on experiment design:**

**R1C3:** The authors collected only data on rainfall and on stemflow volumes. They did not record soil moisture near the plant stems, or observe the fate of stemflow near the soil surface – where, for instance, it might be involved in lateral flow through organic litter materials, or indeed trickle away as overland flow. Instead, they were content to assume tacitly that all of the stemflow was plant-available. Soils are only briefly described, but the authors do note in passing that the surface textures differed between the two shrub species examined (refer to lines 136-137), one being loess and the other, sand.

#### **Reply:**

Thank you for commenting on the experimental design of this study. We did not take soil moisture and the relevant fluxes above or under the ground into account at this manuscript, and the reasons were as follow:

1) The objectives of this study.

We aimed to quantify and compare stemflow yield and efficiency of *C. korshinskii* and *S. psammophila* at branch and shrub scales, to explore the biotic influential mechanism particularly at a finer leaf scale, and to identify the most influential meteorological characteristics. Therefore, only the aboveground eco-hydrological process was involved (from P.6, Line 128 to P.7, Line 139), which was illustrated by the following Fig. R1-1.

2) Different surface soil textures.

As pointed in this comment, the surface soil texture differed between the two experimental stands: sand for *S. psammophila* and loess for *C. korshinskii*, respectively. So, it was difficult to compare the contributions of stemflow to the soil moisture dynamics between those two shrub species.

Therefore, in terms of the specific research objectives and the actual stand conditions, we focused on the inter- and intra-specific difference of stemflow yield and efficiency and its bio-/abiotic influential factors between *C. korshinskii* and *S. psammophila* at this manuscript. But, given that stemflow was well documented as an important source of available moisture at dryland ecosystems (Dunkerley, 2000; Yang, 2010; Navar, 2011; Li, et al., 2013) (in P.24, Line 594–598), it was necessary and of great significance to explore the relation between stemflow and soil moisture dynamics. This has been listed in our following research plans.

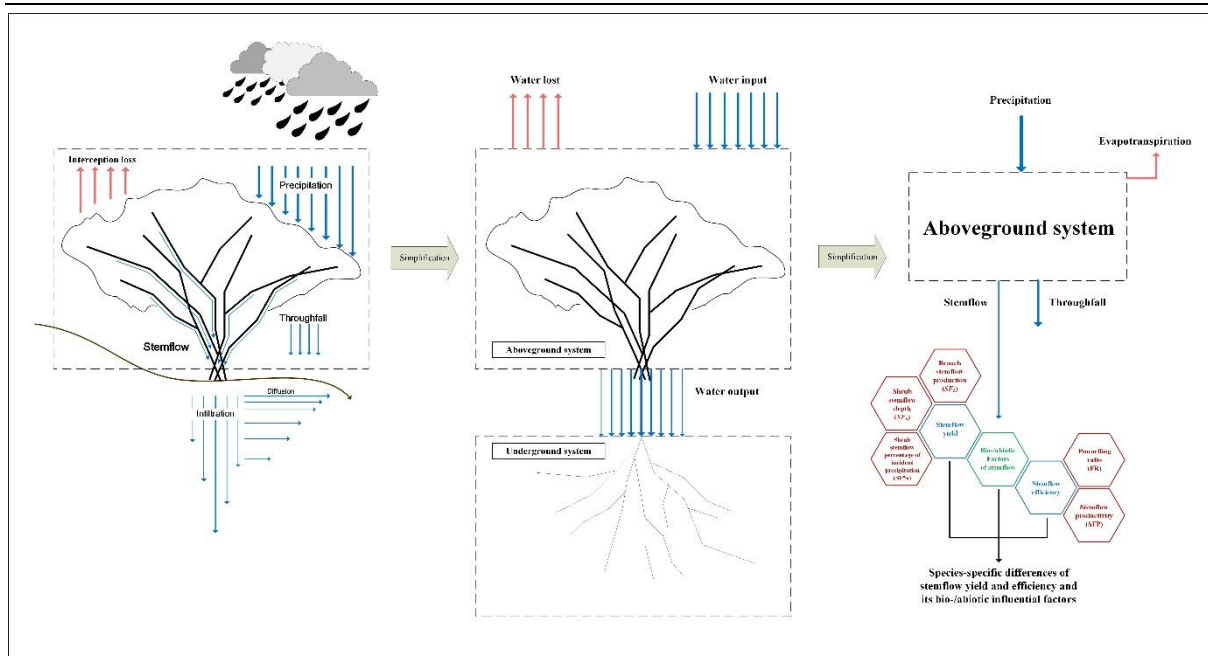

Fig. R1-1. The conceptual framework describing the research objectives and scope: stemflow yield and efficiency and its bio-/abiotic influential factors of *C. korshinskii* and *S. psammophila*.

**R1C4:** Field experiments were conducted only during the rainy season (line 143) but about a quarter of the annual rainfall comes in the drier season, and I think that conditions (in drier season) then needed to be considered also, as the longer, 8 month dry season is possibly the time when plant available moisture is more critical.

#### Reply:

Thank you for this advice on continuing experiments in drier season. It is indeed important for the survival of dryland shrubs to receive enough water supply during dry period.

But different from the Mediterranean climate area, the dry season is the cold and dormant season at the experimental sites. During this period, most of dryland shrubs, including *S. psammophila* and *C. korshinskii*, defoliate. Despite of less precipitation supply, there is less water demand as well. On the contrary, the rainy season was the warm and growing season at this area. During this period, the dryland shrubs foliate, bloom, reproduce and compete with each other for lights and water. The greater water demand makes them more sensitive to the precipitation variation. It is common for these dryland shrubs to experience several wetting-drying cycles (Cui and Caldwell, 1997), especially at northern Loess Plateau of China, where rains are sporadic (in P.24, Line 583–594). Therefore, how to employ the precipitation pulse and small rains to improve water availability is of great importance for dryland shrubs at the rainy season. As an important water resource for soil available moisture, to produce stemflow with a great amount in an efficient manner might be an effective strategy to acquire water (Murakami, 2009) and withstand drought (Martinez-Meza and Whitford, 1996) (in P.24, Line 594–598).



中国科学院生态环境研究中心

Research Center for Eco-Environmental Science  
Chinese Academy of Sciences (CAS)

北京市海淀区双清路 18 号 邮编: 100085 Website: www.rcees.ac.cn  
#18 Shuangqing Road, Haidian District, Beijing 100085, P. R. China  
Tel: 0086-10-62911239 Email: gygao@rcees.ac.cn

---

Nevertheless, it indeed makes this study more systematical and convincing to involve stemflow measurements in drier season. We would consider it seriously in the future, if condition permits.

**R1C5:** Only four individuals of each species were instrumented to collect stemflow data. This is not a large sample, though I appreciate the tedium of instrumenting multi-stemmed plants. Furthermore, of the four plants, only about one third of the branches were instrumented for *C. korshinskii*, and less than half for *S. psammophila*. This reduces the effective sample size still further.

**Reply:**

Thank you for commenting on the effective sample size of this study.

Prior to explaining the effective sample size, it is necessary to introduce that both of *C. korshinskii* and *S. psammophila* are the modular organisms, whose zygote develops into a discrete unit (module), and then produces more units like itself, rather than developing into a complete organism (Allaby, 2010). Each module seeks its own survival goals and the resulting organism level behavior is not centrally controlled (Firn, 2004) (in P.9, Line 202–205). It is required to involve both of the genets (shrubs) and ramets (branches) while counting the sample size of modular organisms (He, 2004).

The branches of *S. psammophila* and *C. korshinskii* compete with each other for lights and water, which are the ideal experiment objects to study stemflow at the branch scale (in P.9, Line 204–207). Thus, in this study, we experimented on individual branches and ignored the canopy variance by selecting sample shrubs with similar intra-specific canopy area and height, e.g.,  $2.1 \pm 0.2$  m and  $5.1 \pm 0.3$  m<sup>2</sup> for *C. korshinskii*, and  $3.5 \pm 0.2$  m and  $21.4 \pm 5.2$  m<sup>2</sup> for *S. psammophila*. A total of 53 branches of *C. korshinskii* (17, 21, 7, 8 for the basal diameter categories of 5–10 mm, 10–15 mm, 15–18 mm and >18 mm, respectively) and 98 branches of *S. psammophila* (20, 30, 20 and 28 branches at the BD categories 5–10 mm, 10–15 mm, 15–18 mm and >18 mm, respectively) were selected for stemflow measurements (in P.10, Line 217–220). Although it is not a great sample size in shrubs amount, it might be enough to discuss stemflow yield and efficiency and the influential mechanism at branch scale.

**R1C6:** Given that it has often been reported that stemflow may fall from branches when rain becomes intense (and overtaxes the ability of stems to conduct all of the incident water), I wondered about the possible effects of trapping and diverting stemflow from so many branches into collecting vessels. This presumably reduced branch drip and so, perhaps, the branch flow carried by branches lying beneath higher ones from which the stemflow had been diverted. I think that the authors need to consider and discuss this possibility, in relation to the possible path of rainfall and throughfall (both free and released) through the canopy of these shrubs.

**Reply:**

Thank you for commenting on the possible effects of experimental setting on stemflow measurements.



中国科学院生态环境研究中心  
Research Center for Eco-Environmental Science  
Chinese Academy of Sciences (CAS)

北京市海淀区双清路 18 号 邮编: 100085 Website: www.rcees.ac.cn  
#18 Shuangqing Road, Haidian District, Beijing 100085, P. R. China  
Tel: 0086-10-62911239 Email: gygao@rcees.ac.cn

---

In this study, we installed one aluminum foil collar to trap stemflow at one branch, which were fitted around the entire branch circumference and close to the branch base. The installed position and the weight of aluminum foil collars ensured limited effects on the original branch inclination. Besides, nearly all sample branches were selected on the skirts of the crown, where was more convenient for installation and ensured the sample branches with limited shading by other branches lying above as well. Associated with the limited external diameter of foil collars, that minimized the accessing of throughfall (both free and released) (in P.10, Line 223–228). Additionally, other selection criteria were also applied: 1) no intercrossing stems, and 2) no turning point in height from branch tip to the base, so as to avoid stemflow converging and bypassing under the influence of neighboring branches and the irrelevant drip-offs (the released throughfall) (Dong, et al., 1987). After completing measurements, the stemflow was returned to the branch base to mitigate the unnecessary drought stress for the sample branches. By doing so, we tried the best to measure the authentic stemflow yield at branch scale with least unnecessary disturbance, including the effects of free and released throughfall on stemflow measurements at this manuscript (from P. 10, Line 230 to P.11, Line 234).

**RIC7:** Relevant field data that I would have liked to see included in the paper are on air temperature, humidity, and windspeed. Solar radiation data would also be informative, together with data on whether the rainfall was recorded primarily during daylight hours or at night, since this is relevant to evaporative losses and to the efficiency with which stemflow can be conveyed across the plant surfaces. The authors can hopefully shed light on at least some of these issues.

**Reply:**

Thank you for commenting on the abiotic influential mechanism of stemflow yield and efficiency. Actually, as shown at the following Fig. R1-2, the meteorological station has been installed to automatically record the wind speed and direction (Model 03002, R. M. Young Company, Traverse City, Michigan, USA), the air temperature and humidity (HMP 155, Vaisala, Helsinki, Finland), and the solar radiation (CNR 4 net radiometer, Kipp & Zonen B.V., Delft, the Netherland). These description has been supplemented in P.9, Line 196–201, and the picture of meteorological station had been updated in Fig.1 in P.55, Line 1142–1144. The detailed meteorological characteristics of rainfall events for stemflow measurements had been supplemented at the “Result” section in P.14, Line 324–334 and indicated by the Fig. 3 in P.58, Line 1149–1151. The relation of meteorological characteristics with stemflow yield and efficiency has been re-analyzed (e.g., indicated at the following Table R1-1 and Table R1-2), and the new findings had been updated from P.20, Line 501 to P.21, Line 506.



**中国科学院生态环境研究中心**  
**Research Center for Eco-Environmental Science**  
**Chinese Academy of Sciences (CAS)**

北京市海淀区双清路 18 号 邮编: 100085 Website: www.rcees.ac.cn  
 #18 Shuangqing Road, Haidian District, Beijing 100085, P. R. China  
 Tel: 0086-10-62911239 Email: gygao@rcees.ac.cn

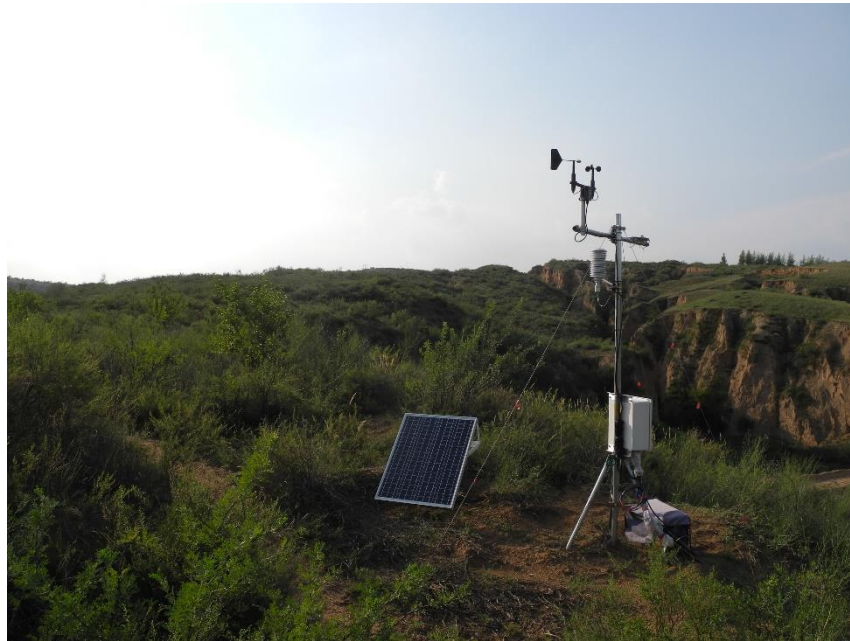

Fig. R1-2. The meteorological station was installed to record the wind speed and direction, the air temperature and humidity, and the solar radiation at Liudaogou catchment.

Table R1-1. The significant meteorological characteristics related with the branch stemflow volume ( $SF_b$ ) tested by the Pearson and partial correlation analyses.

| Shrub species         | Significant correlation<br>( $p < 0.05$ )             | Non-significant correlation<br>( $p > 0.05$ )       |
|-----------------------|-------------------------------------------------------|-----------------------------------------------------|
| <i>C. korshinskii</i> | P, I <sub>10</sub> , RD, H                            | I, I <sub>5</sub> , I <sub>30</sub> , RI, WS, T, SR |
| <i>S. psammophila</i> | P, I <sub>5</sub> , I <sub>10</sub> , I <sub>30</sub> | I, RD, RI, WS, T, H, SR                             |

Note: P means the incident precipitation amount; I, I<sub>5</sub>, I<sub>10</sub>, I<sub>30</sub> are the average rainfall intensity, and the maximum rainfall intensity in 5, 10, and 30 minutes, respectively; RD is rainfall duration; RI is rainfall intervals; WS is the wind speed; T and H are the air temperature and humidity, respectively; SR is the solar radiation.

Table R1-2. The relation of branch stemflow volume ( $SF_b$ ) with meteorological characteristics.

| Shrubs                    | BD categories<br>(mm)       | Regression models                           | $R^2$ | VIF   | AIC   | Contributions to $SF_b$ (%) |                 |
|---------------------------|-----------------------------|---------------------------------------------|-------|-------|-------|-----------------------------|-----------------|
|                           |                             |                                             |       |       |       | P                           | I <sub>10</sub> |
| <i>C.<br/>korshinskii</i> | 5–10                        | $SF_b = -7.60 + 10.98 * P$                  | 0.94  | 1     | 235.6 | 100                         | 0               |
|                           |                             | $SF_b = -0.29 + 11.86 * P - 1.14 * I_{10}$  | 0.96  | 1.2   | 217.4 | 85.7                        | 14.3            |
|                           | 10–15                       | $SF_b = -17.40 + 24.28 * P$                 | 0.93  | 1     | 296.4 | 100                         | 0               |
|                           |                             | $SF_b = 2.64 + 26.94 * P - 3.36 * I_{10}$   | 0.97  | 1.2   | 264.5 | 82.0                        | 18.0            |
|                           | 15–18                       | $SF_b = -66.40 + 49.15 * P$                 | 0.94  | 1     | 338.9 | 100                         | 0               |
|                           |                             | $SF_b = -32.91 + 53.75 * P - 5.77 * I_{10}$ | 0.97  | 1.2   | 313.5 | 84.1                        | 15.9            |
| >18                       | $SF_b = -51.74 + 63.49 * P$ | 0.95                                        | 1     | 348.3 | 100   | 0                           |                 |



**中国科学院生态环境研究中心**  
**Research Center for Eco-Environmental Science**  
**Chinese Academy of Sciences (CAS)**

北京市海淀区双清路 18 号 邮编: 100085 Website: www.rcees.ac.cn  
 #18 Shuangqing Road, Haidian District, Beijing 100085, P. R. China  
 Tel: 0086-10-62911239 Email: gygao@rcees.ac.cn

|                          |          |                                             |      |     |       |      |      |
|--------------------------|----------|---------------------------------------------|------|-----|-------|------|------|
|                          |          | $SF_b = -19.50 + 67.89 * P - 5.53 * I_{10}$ | 0.97 | 1.2 | 333.5 | 87.5 | 12.5 |
|                          | Avg.(BD) | $SF_b = -27.20 + 29.01 * P$                 | 0.95 | 1   | 298.7 | 100  | 0    |
|                          |          | $SF_b = -7.46 + 31.64 * P - 3.33 * I_{10}$  | 0.98 | 1.2 | 271.3 | 84.4 | 15.6 |
| S.<br><i>psammophila</i> | 5–10     | $SF_b = -4.66 + 21.19 * P$                  | 0.96 | 1   | N/A   | 100  | 0    |
|                          | 10–15    | $SF_b = -20.21 + 12.74 * P$                 | 0.94 | 1   | N/A   | 100  | 0    |
|                          | 15–18    | $SF_b = -47.78 + 24.03 * P$                 | 0.95 | 1   | N/A   | 100  | 0    |
|                          | >18      | $SF_b = -120.99 + 49.35 * P$                | 0.96 | 1   | N/A   | 100  | 0    |
|                          | Avg.(BD) | $SF_b = -43.99 + 21.19 * P$                 | 0.96 | 1   | N/A   | 100  | 0    |

Note: P is the incident precipitation amount;  $I_{10}$  is the maximum rainfall intensity in 10 minutes; BD is the branch basal diameter; VIF is the variance inflation factor; AIC is the Akaike information criterion;  $R^2$  is the code of determination; N/A refers to not applicable.

**Reply for comments on Results and Discussion:**

**R1C8:** The authors are imprecise when reporting their results. For instance, line 287 reports average branch stemflow volumes in mL, but the authors do not state whether this is across all rainfall, or averaged per rainfall event, or processed in some other way. For reported stemflow volumes, the associated time period must be stated. Likewise, in line 297, 298, etc., are the volumes reported the sum of stemflow for all branches or the mean per branch or something else? The reporting needs to be much clearer. It is the same when the authors discuss funneling ratios in line 342 and following. Are the figures in this section ratios for individual rainfall events, or averaged over all events? As mentioned earlier, the authors also need to consider how the complete trapping of stemflow from upper branches might have affected the stemflow on lower branches, that might have received less drip from above.

**Reply:**

Thank you for commenting on some imprecise or vague expressions at this manuscript.

We have checked this manuscript carefully and revised these imprecise expressions as required, e.g., adding the corresponding time period in P.17, Line 397, Line 407, Line 414 and Line 419, in P.19, Line 455 and Line 472, in P.23, Line 556 and Line 426, adding the description regarding the sum or the average value for different rainfall events in P.17, Line 397, Line 407 and Line 419, in P.19, Line 454, Line 472 and Line 473–475, in P.21, Line 526, and in P.23, Line 556 and Line 567, and the description regarding the sum or average value for different plant traits in P.17, Line 399 and Line 407, in P.20, Line 476–477, and in P.23, Line 555 and Line 557–558.

The experimental setting for stemflow collection has been explained at Reply for R1C6, in which we described the practices on how to minimize the influences on the authentic branch stemflow measurements.

**R1C9:** I felt that the authors were vague in their discussion of other results. For instance, lines





中国科学院生态环境研究中心

Research Center for Eco-Environmental Science  
Chinese Academy of Sciences (CAS)

北京市海淀区双清路 18 号 邮编: 100085 Website: www.rcees.ac.cn  
#18 Shuangqing Road, Haidian District, Beijing 100085, P. R. China  
Tel: 0086-10-62911239 Email: gygao@rcees.ac.cn

---

366-367 state that precipitation amount was the most important rainfall characteristic that affected stemflow in the studied shrub species. Here I presume they mean that precipitation amount had affected aggregate stemflow volume (and presumably measured at rainfall event scale). Other aspects of stemflow, for instance the peak flux or rate of delivery of stemflow to the base of the plant, are much more likely to have been affected by rainfall intensity. I am not sure why the authors only consider overall stemflow volume, and they should make a case for neglecting other ways to characterize stemflow, including the timing of its delivery from the plant. Stemflow volume alone does not provide a complete exploration of the origin and fate of stemflow.

**Reply:**

Thank you for this comment.

As stated in this comment, the peak flux, the intensity and the rate of delivery of stemflow were indeed good indicators to characterize stemflow and explain the origin and fate of stemflow from the temporal aspects. This manuscript focused on the stemflow yield and efficiency, and their relationships with plant traits and meteorological characteristics (from P.6, Line 130 to P.7, Line 138). The indicators of  $SF_b$ ,  $SF_d$ ,  $SF\%$ , SFP and FR were commonly used in the previous studies (Honda et al., 2015; Levia et al., 2015; Zimmermann et al., 2015; Su et al., 2016), which could provide feasible explanations to explore the bio-/abiotic influential mechanism of stemflow yield and efficiency. Actually, we have already recorded stemflow temporal dynamics, which will be interpreted in our next research.

**RIC10:** The fundamental argument of the paper is again in need of supporting evidence from the beginning of the Discussion at line 393. The authors discuss ‘effective utilization’ of precipitation but as pointed out above, have no data relating to this. Their data only estimate stemflow volumes on above-ground parts of the plants. How this translates to soil moisture in the root zone (allowing for evaporation and interception on litter) is not clear.

The authors should not make claims that are not supported (or supportable) using their available data. They argue in lines 404-405 about the ‘effective utilization of precipitation’ by the two shrub species in rainfalls of < 2 mm. However, any stemflow delivered to the base of the shrubs in what are likely to be short showers, might be largely lost to evaporation once the short event ended. This should illustrate how spurious it might be to infer utilization from stemflow data not supported by soil moisture data, or indeed by measures of transpiration by the plants. The authors proceed (e.g. line 420) to argue about energy conservation, again speculating about the utilization of stemflow from rainfall events of < 2 mm. All of this is completely unsupported by the data, and should be eliminated from the paper, or at least highlighted as completely speculative. Again, in line 430-431 the authors speculate about drought tolerance; not only do they have no supporting data, but the data that they do have were derived during the rainy season, and not in drought conditions at all. How the shrub foliage etc. might change during drought years remains unknown and the authors should eliminate all of their speculation about drought tolerance. Their data relate to stemflow alone, and they should



中国科学院生态环境研究中心  
Research Center for Eco-Environmental Science  
Chinese Academy of Sciences (CAS)

北京市海淀区双清路 18 号 邮编: 100085 Website: www.rcees.ac.cn  
#18 Shuangqing Road, Haidian District, Beijing 100085, P. R. China  
Tel: 0086-10-62911239 Email: gygao@rcees.ac.cn

---

restrict themselves primarily to discussing and interpreting those data.

Lines such as 476-478 inclusive are completely speculative, though the authors write as though they are presenting a result from their work. They refer to stemflow production under ‘water stress conditions’ though they did not observe this; they refer to their estimated stemflow being ‘of significant importance for the survival of the xerophytic shrubs, particularly during long intervals with no rainfall’ though they present absolutely no evidence to support this claim, having no data from long periods with no rainfall. All of this speculation should be eliminated from the paper, or at the very least identified as speculation not supported by any data.

Overall, the focus of the paper needs to shift from speculation to the discussion of what can validly be determined from the field evidence available, namely, the estimated stemflow volumes.

**Reply:**

Thank you for your comments and advices on some speculative discussions for the original version of this manuscript. The focus of the revised manuscript has been shifted from the addressing of some speculations to the interpreting of the measured stemflow data, and we discussed the benefits brought by higher stemflow yield and efficiency for dryland shrubs more cautiously.

To avoid confusions in this study, “precipitation utilization” has been deleted (in P.22, Line 546 and in P.24, Line 582) or changed to “employ precipitation to produce stemflow” (in P.22, Line 550 and in P.23, Line 564). Besides, we revised this manuscript carefully and tried best to guarantee the fact-based conclusions and precise expressions. The expressions of “water stress conditions” (in P.26, Line 647), “particularly during long intervals with no rainfall” (in P.26, Line 649) as described in this comment have been deleted, and “the utilization of stemflow from rainfall events of <2 mm” have been revised in P.26, Line 649.

For the better evidence-based arguments, new supporting materials have been added at the revised manuscript, including (1) new experimental data in a controlled experiment of the foliated and manually defoliated shrubs of *C. korshinskii* and *S. psammophila* during the 2015 rainy season, (2) new meteorological characteristics including wind speed, air temperature and humidity and solar radiation during the 2014 and 2015 rainy seasons, (3) new references addressing the importance of stemflow as potential resource for soil moisture replenishment at the root zone and the deep layer, and the normal functioning of dryland shrubs. Please see Reply for RIC1 for a detailed description.

**Other comments:**

Line 41: what are ‘stemflow channels’? Does this imply fixed pathways?

**Reply:**

Thanks for the correcting. We have revised the “stemflow channels divert precipitation” to “stemflow delivers precipitation” in P.4, Line 57. Additionally, the verb “channel” has also been



中国科学院生态环境研究中心  
Research Center for Eco-Environmental Science  
Chinese Academy of Sciences (CAS)

北京市海淀区双清路 18 号 邮编: 100085 Website: www.rcees.ac.cn  
#18 Shuangqing Road, Haidian District, Beijing 100085, P. R. China  
Tel: 0086-10-62911239 Email: gygao@rcees.ac.cn

---

replaced by “deliver” or “transport” in P.5, Line 87 and in P.23, Line 554.

Line 41: ‘pointedly’ should be ‘directly’ or similar.

**Reply:** Done (in P.4, Line 57).

Line 44: what is meant by ‘biogeochemical reactivity at the terrestrial-aquatic interface’?

**Reply:**

The “biogeochemical reactivity at the terrestrial-aquatic interface” refers to the nutrients cycling assisted by the microorganism activity while the nutrients-enriched stemflow infiltrated to the soil matrix, which was cited from the reporting of McClain et al. (2013), including total nitrogen (TN), total phosphors (TP),  $\text{NH}_4^+\text{-N}$ ,  $\text{NO}_3^-\text{-N}$ ,  $\text{Na}^+$ ,  $\text{K}^+$ ,  $\text{Ca}^{2+}$ ,  $\text{Mg}^{2+}$ ,  $\text{Cl}^-$ ,  $\text{SO}_4^{2-}$ , etc. (Zhang et al., 2013).

For an easier understanding, this sentence had been changed to “The double-funnelling effects of stemflow and preferential flow create “hot spot” and “hot moment” by enhancing nutrients cycling rates at the surface soil matrix” in P.4, Line 60–61.

Line 58: please cite references to support the claim about ‘disproportionately high influence [of stemflow] on survival and competitiveness of xerophytic shrub species’.

**Reply:** Done (in P.4, Line 72–76 and in P.24, Line 594–598).

Line 81: insert missing space before ‘Murakami’.

**Reply:** Done (in P.6, Line 114–115).

Line 155: how do branches exist ‘as independent individuals’?

**Reply:**

Thank you for your question. It related to the biological attributes of modular organisms. Please see Reply for R1C5 for a detailed explanation. For a better understanding, the expression of “existed as independent individuals” had been deleted at the revised manuscript (in P.9, Line 203–204).

Line 214: ‘at the’ should be ‘in a’.

**Reply:** Done (in P.13, Line 301).

Line 238: should ‘4080-mm’ be ‘40-80 mm’?

Line 475: should ‘events of 12-mm’ read ‘events of 1-2 mm’?

Line 268 and many other instances: do not write ‘18-mm’; the hyphen is not allowed in the SI metric system. There must be a space between the numerical quantity and the symbol for the unit of measurement (e.g. ‘18 mm’ is correct).

**Reply:**

Thank you for the correcting and explaining. We had corrected these errors at the revised



中国科学院生态环境研究中心  
Research Center for Eco-Environmental Science  
Chinese Academy of Sciences (CAS)

北京市海淀区双清路 18 号 邮编: 100085 Website: www.rcees.ac.cn  
#18 Shuangqing Road, Haidian District, Beijing 100085, P. R. China  
Tel: 0086-10-62911239 Email: gygao@rcees.ac.cn

---

manuscript (in P.8, Line 173, in P.26, Line 650, and in P.16, Line 386).

Line 280: do the authors data justify 4 decimal places of precision? This requires fixing in many places, such as line 475.

**Reply:**

Thank you for this comment. At the revised manuscript, we kept the fixed one decimal place of precision for all the indicator except for the SFP with the two decimal places, because SFP of one decimal place was too rough to tell a clear difference between different precipitation and BD categories.

Line 492: ‘had not determined yet’ should read ‘have not yet been determined’.

**Reply:** This sentence had been deleted at the revised manuscript. A similar mistake had been corrected in P.6, Line 107.

**Reference:**

- Allaby, M.: A Dictionary of Ecology. 4 ed. Oxford University Press, 2010.
- Allison, G. B. and Hughes, M. W.: The use of natural tracers as indicators of soil-water movement in a temperate semi-arid region, *J. Hydrol.*, 60, 157–173, 1983.
- Dong, S. R., Guo, J. T. and Man, R. Z.: The throughfall, stemflow and interception loss of the *Pinus tabulaeformis* plantations at northern China, *J. Beijing Forestry Univ.*, 9, 58–68, 1987 (in Chinese).
- Dunkerley, D., Hydrologic effects of dryland shrubs: defining the spatial extent of modified soil water uptake rates at an Australian desert site, *J. Arid Environ.*, 45, 2, 159–172, 2000.
- Firn, R.: Plant Intelligence: an Alternative Point of View. *Annals of Botany*, 93, 4, 345–351, 2004.
- He, M. Z.: Branching module and water-retaining capability of desert plants, D. Sc., Gansu Agricultural University, 2004.
- Honda, E. A., Mendonça, A. H., and Durigan, G.: Factors affecting the stemflow of trees in the Brazilian cerrado, *Ecohydrology*, 8, 1351–1362, 2015.
- Levia, D. F., Michalzik, B., N ähe, K., Bischoff, S., Richter, S., and Legates, D. R.: Differential stemflow yield from European beech saplings: the role of individual canopy structure metrics, *Hydrol. Process.*, 29, 43–51, 2015.
- Liang, W.-L., Kosugi, K. I., and Mizuyama, T.: Characteristics of stemflow for tall *Stewartia monadelphica* growing on a hillslope, *J. Hydrol.*, 378, 168–178, 2009.
- Li, X. Y., Hu, X., Zhang, Z. H., Peng, H. Y., Zhang, S. Y., Li, G. Y., Li, L. and Ma, Y. J.: Shrub hydrology: preferential water availability to deep soil layer, *Vadose Zone J.*, 12, 2013.
- Li, X. Y., Yang, Z. P., Li, Y. T., and Lin, H.: Connecting ecohydrology and hydrology in desert shrubs: stemflow as a source of preferential flow in soils, *Hydrol. Earth Syst. Sci.*, 13, 1133–1144, 2009.



中国科学院生态环境研究中心

**Research Center for Eco-Environmental Science  
Chinese Academy of Sciences (CAS)**

北京市海淀区双清路 18 号 邮编: 100085 Website: [www.rcees.ac.cn](http://www.rcees.ac.cn)  
#18 Shuangqing Road, Haidian District, Beijing 100085, P. R. China  
Tel: 0086-10-62911239 Email: [gygao@rcees.ac.cn](mailto:gygao@rcees.ac.cn)

---

- Martinez-Meza, E., and Whitford, W. G.: Stemflow, throughfall and channelization of stemflow by roots in three Chihuahuan desert shrubs, *J. Arid Environ.*, 32, 271–287, 1996.
- McClain, M. E., Boyer, E. W., Dent, C. L., Gergel, S. E., Grimm, N. B., Groffman, P. M., Hart, S. C., Harvey, J. W., Johnston, C. A., and Mayorga, E.: Biogeochemical hot spots and hot moments at the interface of terrestrial and aquatic ecosystems, *Ecosystems*, 6, 301–312, 2003.
- Murakami, S.: Abrupt changes in annual stemflow with growth in a young stand of Japanese cypress, *Hydrol. Res. Lett.*, 3, 32–35, 2009.
- Návar, J., and Bryan, R.: Interception loss and rainfall redistribution by three semi-arid growing shrubs in northeastern Mexico, *J. Hydrol.*, 115, 51–63, 1990.
- Navar, J.: Stemflow variation in Mexico's northeastern forest communities: Its contribution to soil moisture content and aquifer recharge, *J. Hydrol.*, 408, 35–42, 2011.
- Nulsen, R. A., Bligh, K. J., Baxter, I. N., Solin, E. J. and Imrie, D.H.: The fate of rainfall in a mallee and heath vegetated catchment in southern Western Australia, *Aust. J. Ecol.*, 11, 361–371, 1986.
- Pressland, A. J.: Soil moisture redistribution as affected by throughfall and stemflow in an arid zone shrub community, *Aust. J. Bot.*, 24, 5, 641–649, 1976.
- Su, L., Xu, W., Zhao, C. M., Xie, Z. Q. and Ju, H.: Inter- and intra-specific variation in stemflow for evergreen species and deciduous tree species in a subtropical forest, *J. Hydrol.*, 537, 1–9, 2016.
- Yang, Z. P.: Rainfall partitioning process and its effects on soil hydrological processes for sand-fixed shrubs in Mu Us sandland, northwest China, D. Sc., Beijing Normal University, 2010.
- Zhang, Y. F., Wang, X. P., Hu, R., Pan, Y. X. and Zhang, H.: Stemflow in two xerophytic shrubs and its significance to soil water and nutrient enrichment, *Ecol. Res.*, 28, 567–579, 2013.
- Zimmermann, A., Uber, M., Zimmermann, B. and Levia, D. F.: Predictability of stemflow in a species-rich tropical forest, *Hydrol. Process.*, 29, 4947–4956, 2015.

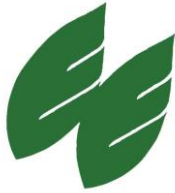

中国科学院生态环境研究中心  
Research Center for Eco-Environmental Science  
Chinese Academy of Sciences (CAS)

北京市海淀区双清路 18 号 邮编: 100085 Website: www.rcees.ac.cn  
#18 Shuangqing Road, Haidian District, Beijing 100085, P. R. China  
Tel: 0086-10-62911239 Email: gygao@rcees.ac.cn

---

## Response to Reviewer #2:

### General reply:

**R2C1:** This study explored stemflow yield in relations to rainfall characteristics and the plant traits of branches and leaves for two dominant shrubs (*C. korshinskii* and *S. psammophila*) during rainy seasons in the northern Loess Plateau of China. This manuscript reports important data on stemflow measurements at the scale of individual branches and highlights the effect of canopy structure (e.g. biomass, the leaf area of the branches, the leaf numbers of the branches, stemflow productivity, and the funnelling ratio) on stemflow production. The finding of this study is interesting and fall into the scope of the HESS. However, my main concern is the title, results and discussions are not really robust and can't be fully supported by data, and the interpretation is weak.

### **Reply:**

Thank you for your comments and interests in this study. We have substantially revised the Title and the sections of Introduction, Materials and Methods, Results, and Discussions at the revised manuscript. Please see the detailed replies to the following comments.

**R2C2:** (1) Title: The “the effects of leaves and implications in drought tolerance” in the title is not well reflected in the results of this study. Although measurements of leaf area index (LAI), the foliage orientation, the leaf area of the branches and the leaf numbers of the branches were made in the study, results of species-specific variation of plant traits (line 236-283) just mainly qualitatively described leaf traits, branch morphology and biomass, which were not directly linked with stemflow characteristics. Moreover, results of this study indicated that precipitation amount was the most influential rainfall characteristic and stem biomass and leaf biomass were the most influential plant traits that affected stemflow in *C. korshinskii* and *S. psammophila*, so the effects of leaves on stemflow were not well investigated in this study. In the case of implications in drought tolerance, authors mainly discussed with personal speculations, there were not solid soil water data to verify it. So I suggest author could delete “the effects of leaves and implications in drought tolerance” from the title.

### **Reply:**

Thank you for your comments and advices regarding the title of this manuscript.

We had revised the title as “Comparisons of stemflow and its bio-/abiotic influential factors between two xerophytic shrub species” (please see P.1, Title).

The effects of leaves on stemflow has been further interpreted with a controlled experiment of comparing stemflow yield between the foliated and manually defoliated shrubs during the



中国科学院生态环境研究中心  
Research Center for Eco-Environmental Science  
Chinese Academy of Sciences (CAS)

北京市海淀区双清路 18 号 邮编: 100085 Website: www.rcees.ac.cn  
#18 Shuangqing Road, Haidian District, Beijing 100085, P. R. China  
Tel: 0086-10-62911239 Email: gygao@rcees.ac.cn

2015 rainy season (in P.11, Line 235–251, in P.18, Line 433–447, in P.31, Line 758–778, in P.33, Line 812–820, and in P.50, Line 1107–1110).

Some speculation, such as “drought tolerance” has been deleted from the title and other places in P.2, Line 39, in P.7, Line 140, in P.8, Line 166, in P.24, Line 601–603, and in P.32, Line 804. Please see the detailed description at Reply to R1C10 at Response to Reviewer #1.

**R2C3:** (2) Introduction: The objectives of this study were not clear, what’s the new findings made by this study? What’s the knowledge gaps in stemflow researches for shrubs? In fact, stemflow of *C. korshinskii* and *S. psammophila* were already studied in China, what’s the difference between studies? I wonder if authors can highlight the stemflow yield from branches and stemflow productivity between shrubs.

**Reply:**

Thank you for your comments and constructive advices regarding the new findings of this manuscript, which were listed as follow.

1) We introduced the indicator of stemflow productivity (Yuan et al., 2016) and assessed stemflow efficiency for the first time with the combined results of funnelling ratio and stemflow productivity in this study (in P.2, Line 26). Along with other indicators of  $SF_b$ ,  $SF_d$  and  $SF\%$ , the inter- and intra-specific differences of stemflow yield and efficiency were studied comprehensively at this manuscript (as indicated at the following Table R2-1).

2) We studied the effects of meteorological characteristics and plant traits particularly at the finer leaf scale affecting stemflow yield and efficiency.

A direct evidence regarding leaf’s effects on stemflow yield was provided at this manuscript with a controlled experiment of comparing the branch stemflow yield ( $SF_b$ ) between the foliated and manually defoliated *C. korshinskii* and *S. psammophila* during the 2015 rainy season. In relative to the previous studies, it was believed the first controlled experiment at field, which guarantee the identical stand conditions and meteorological characteristics (as indicated at the following Table R2-2). We found that the newly exposed branch surface at the defoliated period and the resulting rainfall intercepting effect might be of significance for stemflow production, which was generally ignored by previous studies.

Table R2-1. Comparison of the advantage and drawback between stemflow indicators.

| NO. | Stemflow indicators                               | Expressions      | Advantages                                  | Drawbacks                                             |
|-----|---------------------------------------------------|------------------|---------------------------------------------|-------------------------------------------------------|
| 1   | Stemflow volume<br>( $SF_v$ , mL)                 | N/A              |                                             | Hard to compare the $SF_b$ -specific differences      |
| 2   | Stemflow equivalent water depth<br>( $SF_d$ , mm) | $SF_d = SF_v/CA$ | Simple and clear to present stemflow yield. | because of the huge variation of plant traits between |
| 3   | Stemflow percentage of                            | $SF\% = SF_d/P$  |                                             |                                                       |

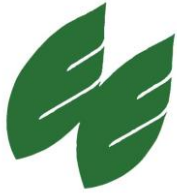

**中国科学院生态环境研究中心**  
**Research Center for Eco-Environmental Science**  
**Chinese Academy of Sciences (CAS)**

北京市海淀区双清路 18 号 邮编: 100085 Website: www.rcees.ac.cn  
 #18 Shuangqing Road, Haidian District, Beijing 100085, P. R. China  
 Tel: 0086-10-62911239 Email: gygao@rcees.ac.cn

|   |                                                                  |                           |                                                                                                                  |                                                                                                   |
|---|------------------------------------------------------------------|---------------------------|------------------------------------------------------------------------------------------------------------------|---------------------------------------------------------------------------------------------------|
|   | incident precipitation<br>(SF%, %)                               |                           |                                                                                                                  | different plant functional types.                                                                 |
| 4 | Funneling ratio<br>(FR)                                          | $FR = SF_v / (P * S)$     | 1) Available to compare inter-specific stemflow efficiency;<br>2) Commonly used to evaluate stemflow efficiency. | Relative a weak connection with plant growth, e.g., biomass accumulation and allocating patterns. |
| 5 | Stemflow productivity<br>(SFP, $\text{mL} \cdot \text{g}^{-1}$ ) | $SFP = SF_v / \text{BMB}$ | Characterizing stemflow efficiency and relating closely with biomass accumulating and allocating.                | No response to variation of meteorological characteristics.                                       |

Note: CA is the canopy area; P is the precipitation amount; and BMB is the branch biomass.

Table R2-2. Previous studies regarding leaf's effects on stemflow by comparing stemflow yield at the foliated and defoliated period.

| The effects of leaves on stemflow yield | Relevant studies             | Reference                        |
|-----------------------------------------|------------------------------|----------------------------------|
| Negative effects                        | Oak forest in Holland        | Dolman, 1987                     |
|                                         | Oak forest in Spain          | Muzylo et al., 2009              |
|                                         | Laurel forest in Japan       | Masukata et al., 1990            |
|                                         | Beech plantation in England  | Neal et al., 1993                |
| Positive effects                        | Stewartia forest in Japan    | Liang et al., 2009               |
| Neglectable effects                     | Desert shrubs in USA         | Martinez-Meza and Whitford, 1996 |
|                                         | Broad-leaves forest in Japan | Deguchi et al., 2006             |

**R2C4:** (3) Materials and Methods: As shrubs grow during the rainy period, at what period (time) or measurement frequency do authors measure plant traits, particularly for biomass (line 175), how can you confirm them represent real plant trait dynamics, which were not clearly described in the text. Line 155: what's the “modular organisms and multi-stemmed shrub”?

**Reply:**

Thank you for your comments on experimental design of this manuscript.

It is a good question regarding the time dependency of plant traits measurements, particularly for biomass. We measured biomass and leaf traits simultaneously at middle August when the shrubs showed maximum vegetative growth during the rainy season (in P.12, Line 262). If conducting the dynamic measurements, the shrubs would be constantly disturbed even destroyed, and the results of stemflow yield and efficiency would be biased in this study. The





中国科学院生态环境研究中心  
Research Center for Eco-Environmental Science  
Chinese Academy of Sciences (CAS)

北京市海淀区双清路 18 号 邮编: 100085 Website: www.rcees.ac.cn  
#18 Shuangqing Road, Haidian District, Beijing 100085, P. R. China  
Tel: 0086-10-62911239 Email: gygao@rcees.ac.cn

---

variation of those plant traits was small during the experimental period, and they were generally ignored (Siles et al., 2010a, b; Levia, et al., 2015; Zhang et al., 2015).

The modular organism are those organisms, whose zygote develops into a discrete unit (module), and then produces more units like itself, rather than developing into a complete organism (Allaby, 2010). Each module seeks its own survival goals and the resulting organism level behavior is not centrally controlled (Firn, 2004) (in P.9, Line 202–205). The multi-stemmed shrubs have no trunk but have multiple branches that radiate from their base (in P.8, Line 167–169), e.g., *C. korshinskii* and *S. psammophila* in this study. These two shrub species are the ideal experimental objects to study stemflow at the branch scale.

**R2C5:** (4) Results: For the most part of the “3.1 Species-specific variation of plant traits”, it is not really the results of the study, I would suggest authors move some of the description of *C. korshinskii* and *S. psammophila* to the section of “Materials and Methods”. Line 387-390: it is not clear, why big difference existed between rains 10 mm and the heavy rain.

Reply:

Thank you for your comments. The description of plant traits of *C. korshinskii* and *S. psammophila* has been moved to the “Materials and Methods” section as required in P.8, Line 169–175.

We have discussed the reasons for different plant trait of leaves and branches affecting SFP between smaller rains  $\leq 10$  mm and heavier rains  $> 15$  mm, respectively. It might relate to the specific stemflow producing processes during different-sized rains. Please see the detailed description in P.22, Line 529–535.

**R2C6:** (5) Discussions: I would suggest authors focus on the interpretation of the results of this study, but not speculations on utilization of more rains via a low precipitation, there was not direct evidence or robust data to support the proposed conclusion.

Reply:

Thank you for your comments on interpreting the results of this manuscript.

The focus of the revised manuscript has been shifted from the discussing of some speculations to the interpreting of the measured stemflow data. We have deleted the vague expressions of “water stress conditions” (in P.26, Line 647), “particularly during long intervals with no rainfall” (in P.26, Line 649). The phrase of “implication in drought tolerance” has also been deleted in the title (in P1, the Title). To avoid confusions at this manuscript, “precipitation utilization” has been deleted (in P.22, Line 546, and in P.24, Line 582) or changed to “employ precipitation to produce stemflow” (in P.22, Line 550, and in P.23, Line 564). More detailed description please see Reply to R1C1 and Reply to R1C10 at the Response to reviewer #1.



中国科学院生态环境研究中心  
Research Center for Eco-Environmental Science  
Chinese Academy of Sciences (CAS)

北京市海淀区双清路 18 号 邮编: 100085 Website: www.rcees.ac.cn  
#18 Shuangqing Road, Haidian District, Beijing 100085, P. R. China  
Tel: 0086-10-62911239 Email: gygao@rcees.ac.cn

**R2C7:** (6) English languages needs refine by a native English speakers.

**Reply:**

Thank you for this comment. We have already sent this manuscript for a professional language editing. Please see the certificate as follow. Furthermore, the language of revised manuscript has been double checked.

nature research  
EDITING SERVICE

### Nature Research Editing Service Certification

This is to certify that the manuscript titled Greater stemflow yield and efficiency of *Caragana korshinskii* than *Salix psammophila*: leaf's effect and implication for drought tolerance was edited for English language usage, grammar, spelling and punctuation by one or more native English-speaking editors at Nature Research Editing Service. The editors focused on correcting improper language and rephrasing awkward sentences, using their scientific training to point out passages that were confusing or vague. Every effort has been made to ensure that neither the research content nor the authors' intentions were altered in any way during the editing process.

Documents receiving this certification should be English-ready for publication; however, please note that the author has the ability to accept or reject our suggestions and changes. To verify the final edited version, please visit our verification page. If you have any questions or concerns over this edited document, please contact Nature Research Editing Service at [languageediting@as.springernature.com](mailto:languageediting@as.springernature.com).

**Manuscript title:** Greater stemflow yield and efficiency of *Caragana korshinskii* than *Salix psammophila*: leaf's effect and implication for drought tolerance

**Authors:** Chuan Yuan, Guangyao Gao, Bojie Fu

**Key:** EDA6-0499-5F73-CC0C-4063

This certificate may be verified at [secure.authorservices.springernature.com/certificate](https://secure.authorservices.springernature.com/certificate).

Nature Research Editing Service is a service from Springer Nature, one of the world's leading research, educational and professional publishers. We have been a reliable provider of high-quality editing since 2008.

Nature Research Editing Service comprises a network of more than 900 language editors with a range of academic backgrounds. All our language editors are native English speakers and must meet strict selection criteria. We require that each editor has completed or is completing a Masters, Ph.D. or M.D. qualification, is affiliated with a top US university or research institute, and has undergone substantial editing training. To ensure we can meet the needs of researchers in a broad range of fields, we continually recruit editors to represent growing and new disciplines.

Uploaded manuscripts are reviewed by an editor with a relevant academic background. Our senior editors also quality-assess each edited manuscript before it is returned to the author to ensure that our high standards are maintained.

CERTIFICATE EDA6-0499-5F73-CC0C-4063 - AUGUST 10, 2016 - PAGE 1 OF 1

**Fig. R2-1.** The certificate for language editing.



中国科学院生态环境研究中心  
Research Center for Eco-Environmental Science  
Chinese Academy of Sciences (CAS)

北京市海淀区双清路 18 号 邮编: 100085 Website: www.rcees.ac.cn  
#18 Shuangqing Road, Haidian District, Beijing 100085, P. R. China  
Tel: 0086-10-62911239 Email: gygao@rcees.ac.cn

---

If you have any further questions about this revision, please contact us.

Sincerely Yours,

Dr. Guangyao Gao (gygao@rcees.ac.cn)

**Reference:**

- Allaby, M.: A Dictionary of Ecology. 4 ed. Oxford University Press, 2010.
- Allison, G. B. and Hughes, M. W.: The use of natural tracers as indicators of soil-water movement in a temperate semi-arid region, *J. Hydrol.*, 60, 157–173, 1983.
- Deguchi, A., Hattori, S. and Park, H. T.: The influence of seasonal changes in canopy structure on interception loss: Application of the revised Gash model, *J. Hydrol.*, 318, 80–102, 2006.
- Dolman, A. J.: Summer and winter rainfall interception in an oak forest. Predictions with an analytical and a numerical simulation model, *J. Hydrol.*, 90, 1–9, 1987.
- Dunkerley, D., Hydrologic effects of dryland shrubs: defining the spatial extent of modified soil water uptake rates at an Australian desert site, *J. Arid Environ.*, 45, 2, 159–172, 2000.
- Firn, R.: Plant Intelligence: an Alternative Point of View. *Annals of Botany*, 93, 4, 345–351, 2004.
- Levia, D. F., Michalzik, B., Nähe, K., Bischoff, S., Richter, S., and Legates, D. R.: Differential stemflow yield from European beech saplings: the role of individual canopy structure metrics, *Hydrol. Process.*, 29, 43–51, 2015.
- Li, X. Y., Yang, Z. P., Li, Y. T., and Lin, H.: Connecting ecohydrology and hydrogeology in desert shrubs: stemflow as a source of preferential flow in soils, *Hydrol. Earth Syst. Sci.*, 13, 1133–1144, 2009.
- Liang, W. L., Kosugi, K.I. and Mizuyama, T.: Characteristics of stemflow for tall *Stewartia monadelphica* growing on a hillslope, *J. Hydrol.*, 378, 168–178, 2009.
- Martinez-Meza, E., and Whitford, W. G.: Stemflow, throughfall and channelization of stemflow by roots in three Chihuahuan desert shrubs, *J. Arid Environ.*, 32, 271–287, 1996.
- Masukata, H., Ando, M. and Ogawa, H.: Throughfall, stemflow and interception of rainwater in an evergreen broadleaved forest, *Ecol. Res.*, 5, 303–316, 1990.
- Murakami, S.: Abrupt changes in annual stemflow with growth in a young stand of Japanese cypress, *Hydrol. Res. Lett.*, 3, 32–35, 2009.
- Muzylo, A., Llorens, P., Valente, F., Keizer, J. J., Domingo, F. and Gash, J. H. C.: A review of rainfall interception modelling, *J. Hydrol.*, 370, 191–206, 2009.
- Neal, C., Robson, A. J., Bhardwaj, C. L., Conway, T., Jeffery, H. A., Neal, M., Ryland, G. P., Smith, C. J., and Walls, J.: Relationships between precipitation, stemflow and throughfall



中国科学院生态环境研究中心

Research Center for Eco-Environmental Science  
Chinese Academy of Sciences (CAS)

北京市海淀区双清路 18 号 邮编: 100085 Website: www.rcees.ac.cn  
#18 Shuangqing Road, Haidian District, Beijing 100085, P. R. China  
Tel: 0086-10-62911239 Email: gygao@rcees.ac.cn

---

- for a lowland beech plantation, Black Wood, Hampshire, southern England: findings on interception at a forest edge and the effects of storm damage, *J. Hydrol.*, 146, 221–233, 1993.
- Nulsen, R. A., Bligh, K. J., Baxter, I. N., Solin, E. J. and Imrie, D.H.: The fate of rainfall in a mallee and heath vegetated catchment in southern Western Australia, *Aust. J. Ecol.*, 11, 361–371, 1986.
- Pressland, A. J.: Soil moisture redistribution as affected by throughfall and stemflow in an arid zone shrub community, *Aust. J. Bot.*, 24, 5, 641–649, 1976.
- Siles, P., Harmand, J.M., Vaast, P.: Effects of *Inga densiflora* on the microclimate of coffee (*Coffea arabica* L.) and overall biomass under optimal growing conditions in Costa Rica, *Agroforest. Syst.*, 78, 269–286, 2010.
- Siles, P., Vaast, P., Dreyer, E., Harmand, J.M.: Rainfall partitioning into throughfall, stemflow and interception loss in a coffee (*Coffea arabica* L.) monoculture compared to an agroforestry system with *Inga densiflora*, *J. Hydrol.*, 395, 39–48, 2010.
- Yuan, C., Gao, G.Y., and Fu, B.J.: Stemflow of a xerophytic shrub (*Salix psammophila*) in northern China: Implication for beneficial branch architecture to produce stemflow, *J. Hydrol.*, 539, 577–588, 2016.
- Zhang, S. Y., Li, X. Y., Li, L., Huang, Y. M., Zhao, G. Q. and Chen, H. Y.: The measurement and modelling of stemflow in an alpine *Myricaria squamosa* community, *Hydrol. Process.*, 29, 889–899, 2015.

1 **Comparisons of stemflow ~~yield~~ and ~~efficiency~~ its bio-/abiotic influential**  
2 **factors between two xerophytic ~~shrubs: the effects of leaves and~~**  
3 **implications in drought tolerance shrub species**

4  
5 **C.Chuan Yuan<sup>1,2</sup>, G.Y.Guangyao Gao<sup>1,3</sup>, B.J.and Bojie Fu<sup>1,3</sup>**  
6

7 <sup>1</sup> State Key Laboratory of Urban and Regional Ecology, Research Center for Eco-  
8 Environmental Sciences, Chinese Academy of Sciences, Beijing 100085, China

9 <sup>2</sup> University of Chinese Academy of Sciences, Beijing 100049, China

10 <sup>3</sup> Joint Center for Global Change Studies, Beijing 100875, China  
11

12 *Correspondence to:* **G.Y.Guangyao Gao** ([gygao@rcees.ac.cn](mailto:gygao@rcees.ac.cn))

13 Tel.: +86 10 62841239

14 **Abstract.**

15 Stemflow transports enriched precipitation to the rhizosphere and ~~is highly important for~~  
16 ~~the survival of xerophytic shrubs~~ functioned as an efficient terrestrial flux in water-stressed  
17 ecosystems. However, its ecological significance has generally been underestimated because it  
18 is relatively limited in amount, and the biotic mechanisms that affect it have not been  
19 thoroughly studied at the leaf scale. ~~In this study,~~ This study was conducted during the 2014  
20 and 2015 rainy seasons at northern Loess Plateau of China. We measured the branch stemflow  
21 volume ( $SF_b$ ), ~~the~~ shrub stemflow equivalent water depth ( $SF_d$ ), ~~the~~ stemflow percentage of  
22 incident precipitation (SF%), ~~the~~ stemflow productivity (SFP), ~~the~~ funnelling ratio (FR), the  
23 ~~rainfall~~ meteorological characteristics and ~~the~~ plant traits of branches and leaves of *C.*  
24 *korshinskii* and *S. psammophila* ~~were measured during the 2014 and 2015 rainy seasons in the~~  
25 ~~northern Loess Plateau of China., respectively.~~ This study evaluated ~~the~~ stemflow ~~production~~  
26 efficiency for the first time with the combined results of SFP and FR, and sought to determine  
27 the inter- and intra-specific differences ~~in~~ of stemflow ~~production~~ yield and ~~production~~  
28 efficiency between the two species, as well as the specific bio-/abiotic mechanisms that affected  
29 stemflow. The results indicated that ~~precipitation amount was the most influential rainfall~~  
30 ~~characteristic that affected stemflow in these two endemic shrub species and that stem biomass~~  
31 ~~and leaf biomass were the most influential plant traits in C. korshinskii and S. psammophila,~~  
32 ~~respectively. C. korshinskii had a greater stemflow production and production~~ C. korshinskii  
33 had a greater stemflow yield and efficiency at all precipitation levels, and the largest inter-  
34 specific difference was generally in the 5–10 ~~mm young shoots during the most frequent~~  
35 ~~rainfall events of  $\leq 2$  mm. C. korshinskii had a lower precipitation threshold (0.9 mm vs. 2.1~~  
36 ~~mm for S. psammophila), which provided more available water from rainfall for stemflow. The~~  
37 ~~leaves affected stemflow production, and the beneficial leaf traits contributed to the higher~~  
38 ~~stemflow production of C. korshinskii. In summary, C. korshinskii might have greater drought~~  
39 ~~tolerance and a competitive edge in a dryland ecosystem because of greater and more efficient~~  
40 ~~stemflow production, a lower precipitation threshold and more advantageous leaf traits.~~ mm  
41 branches during rains of  $\leq 2$  mm. Precipitation amount was the most influential meteorological

42 characteristic that affected stemflow yield and efficiency in these two endemic shrub species,  
43 and branch angle was the most influential plant trait on FR. For  $SF_b$ , stem biomass and leaf  
44 biomass were the most influential plant traits in *C. korshinskii* and *S. psammophila*,  
45 respectively. For SFP of these two shrubs, leaf traits (the individual leaf area) and branch traits  
46 (branch size and biomass allocation pattern) had great influence during smaller rains of  $\leq 10$   
47 mm and heavier rains of  $> 15$  mm, respectively. The lower precipitation threshold of *C.*  
48 *korshinskii* to start stemflow (0.9 mm vs. 2.1 mm for *S. psammophila*) entitled *C. korshinskii*  
49 to employ more rains to harvest water via stemflow. The beneficial leaf traits (e.g., leaf shape,  
50 arrangement, area, amount, etc.) might partly explain the great stemflow production of *C.*  
51 *korshinskii*. Comparison of  $SF_b$  between the foliated and manually defoliated shrubs during the  
52 2015 rainy season indicated that the newly exposed branch surface at the defoliated period and  
53 the resulting rainfall intercepting effects might be an important mechanism affecting stemflow.  
54 Keywords: Xerophytic shrub; Stemflow production; stemflow production efficiency; Threshold  
55 precipitation; Beneficial leaf traits.

---

## 56 **1 Introduction**

57 Stemflow ~~channels divert~~delivers precipitation pointedly into the root zone of a plant via  
58 preferential root paths, worm paths and soil macropores. The double-funnelling effects of  
59 stemflow and preferential flow create “hot spots” and “hot moments” by enhancing  
60 ~~biogeochemical reactivity~~nutrients cycling rates at the ~~terrestrial-aquatic interface~~surface soil  
61 matrix (McClain et al., 2003; Johnson and Lehmann, 2006; Sponseller, 2007), thus  
62 substantially contributing to the formation and maintenance of so-called “fertile islands”  
63 (Whitford et al., 1997), “resource islands” (Reynolds et al., 1999) or “hydrologic islands”  
64 (Rango et al., 2006). This effect is important for the normal function of rain-fed dryland  
65 ecosystems (Wang et al., 2011).–

66 Shrubs are a representative plant functional type (PFT) in dryland ecosystems and have  
67 developed effective physiological drought tolerance by reducing water loss, e.g., through  
68 adjusting their photosynthetic and transpiration rate by regulating stomatal conductance and  
69 abscisic acid (ABA), titling their osmotic equilibrium by regulating the concentration of soluble  
70 sugars and inorganic ions, and removing free radicals (Ma et al., 2004, 2008). The ~~efficient~~  
71 ~~production of stemflow is~~, a vital eco-hydrological flux, is involved in replenishing soil water  
72 replenishment at shallow and deep layers (Pressland 1973) ~~as well as~~, particularly the root zone  
73 (Whitford et al., 1997; Dunkerley 2000; Yang 2010), even during light rains (Li et al., 2009).  
74 It might allow the endemic shrubs to remain physically active during drought spells (Navar and  
75 Bryan, 1990; Navar, 2011). The stemflow is an important potential source for available water  
76 at rain-fed dryland ecosystem (Li et al., 2013). Therefore, producing stemflow with a greater  
77 amount in a more efficient manner might be an effective strategy to utilize precipitation by  
78 reducing the evaporation loss (Devitt and Smith, 2002; Li et al., 2009), acquire water  
79 (Murakami, 2009) and withstand drought (Martinez-Meza and Whitford, 1996). However,  
80 because stemflow occurs in small amounts, previous studies have usually ignored stemflow



81 (Llorens and Domingo, 2007; [Zhang et al., 2016](#)) and have underestimated its  
82 disproportionately high influence on ~~the survival and competitiveness of~~ xerophytic shrub  
83 species. ([Andersson, 1991](#); [Levia, et al., 2003](#); [Li, 2011](#)). Therefore, [it is important to quantify](#)  
84 the ~~quantification of~~ inter- and intra-specific stemflow ~~production is important~~[yield](#), to assess  
85 the stemflow production efficiency and to elucidate the underlying bio-/abiotic mechanisms.

86 Stemflow [productionyield](#) includes the stemflow volume and depth, and it describes the  
87 total flux ~~channelled~~[delivered](#) down to the base of a branch or a trunk, but stemflow data are  
88 unavailable for comparison of inter-specific differences caused by variations in the branch  
89 architecture, the canopy structure, the shrub species and the eco-zone. Herwitz (1986)  
90 introduced the funnelling ratio (FR), which ~~is~~[was](#) expressed as the quotient of the volume of  
91 stemflow ~~produced~~[yield](#) and the product of the base area and the precipitation amount. It  
92 indicates the efficiency with which individual branches or shrubs capture raindrops and deliver  
93 the water to the root zone ([Siegert and Levia, 2014](#)). The FR allows a comparison of the inter-  
94 and intra-specific stemflow [productionyield](#) under different precipitation conditions. However,  
95 the FR does not provide a [good](#) connection between hydrological processes (e.g., rainfall  
96 redistribution) and the plant growth processes (e.g., biomass accumulation and allocation).  
97 Recently, [Yuan et al. \(2016\)](#) have introduced the parameter [of](#) stemflow productivity (SFP),  
98 expressed as the volume of stemflow [productionyield](#) per unit of branch biomass. The SFP  
99 describes the efficiency in an energy-conservation manner by comparing the stemflow  
100 ~~volume~~[yield](#) of a unit biomass increment of different-sized branches.

101 The precipitation amount is an abiotic mechanism that has [generally](#) been recognized as  
102 the single most influential rainfall characteristic ([Clements 1972](#); [André et al., 2008](#); [Van Stan](#)  
103 [et al., 2014](#)). However, in terms of biotic mechanisms, although the canopy structure  
104 ([Mauchamp and Janeau, 1993](#); [Crockford and Richardson, 2000](#); [Pypker et al., 2011](#)) and  
105 branch architecture ([Herwitz, 1987](#); [Murakami 2009](#); [Carlyle-Moses and Schooling, 2015](#))

106 have been studied for years, the most important plant traits that vary with location and shrub  
107 species have not yet been determined. The effects of the leaves have been studied more recently  
108 at a smaller scale, e.g., leaf orientation (Crockford and Richardson, 2000), shape (Xu et al.,  
109 2005), arrangement pattern (Owens et al., 2006), pubescence (Garcia-Estringana et al., 2010),  
110 area (Sellin et al., 2012), epidermis microrelief (Roth-Nebelsick et al., 2012), amount (Li ~~and~~  
111 ~~Xiao, et al.~~, 2016), biomass (Yuan et al., 2016; ~~Li et al., 2016~~), etc. Although comparisons of  
112 stemflow ~~production yield~~ during ~~summer (the growing or foliated season)~~ and ~~winter (the~~  
113 ~~dormant seasons usually or defoliated season)~~ ~~generally~~ indicate negative effects of leaves  
114 because the more stemflow occurred at the leafless period (Dolman, 1987; ~~Masukata at al.~~,  
115 ~~1990~~; Neal et al., 1993; Muzyło et al., 2012), both negligible and positive effects have also  
116 been confirmed by Martinez-Meza and Whitford (1996), ~~Deguchi et al. (2006)~~ and Liang et al.  
117 (2009), ~~respectively~~). Nevertheless, the validity of these findings has been called into question  
118 as a result of the seasonal variation of meteorological conditions and plant traits, e.g., wind  
119 speed (André et al., 2008), rainfall intensity (Dunkerley et al., ~~2014 a~~2014a, b), air temperature  
120 and consequent precipitation type (snow-to-rain vs. snow) (Levia, 2004). ~~Besides, they ignore~~  
121 ~~the effects of the exposed stems at leafless period, which comprise of a new canopy-atmosphere~~  
122 ~~interface and substitute the leaves to intercept raindrops~~. Therefore, a controlled experiment  
123 with ~~the~~ foliated and manually defoliated plants under the same stand conditions is needed to  
124 resolve these uncertainties.

125 In this study, the branch stemflow volume ( $SF_b$ ), the shrub stemflow depth ( $SF_d$ ), the  
126 stemflow percentage of the incident precipitation amount (SF%), the SFP and the FR were  
127 measured in two ~~xerophytic~~ shrub species (~~*C. korshinskii* and *S. psammophila*~~) ~~endemic to a~~  
128 ~~semiarid area of northern China~~ during the 2014 and 2015 rainy seasons. ~~Furthermore, a~~  
129 ~~controlled experiment with defoliated and manually defoliated shrubs was conducted for the~~  
130 ~~two shrub species during the 2015 rainy season~~. The ~~detailed~~ objectives ~~of this study~~ were to

131 (1) quantify the inter- and intra-specific stemflow ~~production yield~~ ( $SF_b$ ,  $SF_d$  and SF%) and ~~the~~  
132 ~~production~~ efficiency (SFP and FR); ~~at different precipitation levels~~; (2) ~~investigate the effects~~  
133 ~~of~~ ~~identify~~ the ~~rainfall~~ most influential meteorological characteristics ~~and~~ ~~affecting stemflow~~  
134 yield, and (3) investigate the biotic influential mechanism of plant traits ~~on the stemflow in~~  
135 ~~these two shrub species~~; and (3) ~~specifically identify especially at the finer~~ leaf characteristics  
136 ~~that affects~~ scale by comparing the stemflow ~~with respect to morphology, structural~~  
137 ~~characteristics and the biomass partitioning pattern~~. yield in the defoliated and manually  
138 defoliated shrubs. Given that only the aboveground eco-hydrological process was involved, we  
139 focused on stemflow in this study. The achievement of these research objectives would ~~provide~~  
140 ~~a novel characterization of plant drought tolerance and species competitiveness in terms of~~  
141 ~~stemflow and further the advance our~~ understanding of the ~~effect~~ ecological importance of  
142 stemflow for dryland shrubs and the significance of leaves ~~on the survival and growth of plants~~  
143 from an eco-hydrological perspective.

144

## 145 **2 Materials and Methods**

### 146 **2.1 Study area**

147 This study was conducted at the Liudaogou catchment (110°21'—110°23'E, 38°46'—  
148 38°51'N) in Shenmu County in the Shaanxi Province of China. It is 6.899 km<sup>2</sup> and 1094—1273  
149 m above sea level (a.s.l.). This area has a semiarid continental climate with well-defined rainy  
150 and dry seasons. The mean annual precipitation (MAP) between 1971 and 2013 was 414 mm,  
151 with approximately 77% of the annual precipitation amount occurring during the rainy season  
152 (Jia et al., 2013), which lasts from July to September. The mean annual temperature and  
153 potential evaporation are 9.0 °C and 1337 mm year<sup>-1</sup> (Zhao ~~and Shao, 2009~~ et al., 2010),  
154 respectively. The coldest and warmest months are January and July, with an average monthly  
155 temperature of 9.7 °C and 23.7 °C, respectively. Two soil types of Aeolian sandy soil and Ust-

156 Sandiic Entisol dominate this catchment (Jia et al., 2011). Soil particles consist of 11.2%–14.3%  
157 14.3% clay, 30.1%–44.5% silt and 45.4%–50.9% sand in terms of the soil classification  
158 system of United States Department of Agriculture (Zhu and Shao, 2008). The original plants  
159 are scarcely present, except for very few surviving shrub species, e.g., *Ulmus macrocarpa*,  
160 *Xanthoceras sorbifolia*, *Rosa xanthina*, *Spiraea salicifolia*, etc. The currently predominant  
161 shrub species were planted decades ago, e.g., *S. psammophila*, *C. Korshinskii*, *Amorpha*  
162 *fruticosa*, etc., and the predominant grass species include *Medicago sativa*, *Stipa bungeana*,  
163 *Artemisia capillaris*, *Artemisia sacrorum*, etc. (Ai et al., 2015).

164 *C. Korshinskii* and *S. psammophila* are endemic shrub species in arid and semiarid  
165 northern China and were planted for wind-proofing and dune-stabilizing ~~because of their great~~  
166 ~~drought tolerance.~~ Two representative experimental stands were established in the southwest  
167 of the Liudaogou catchment (Fig. 1). Both *C. korshinskii* and *S. psammophila* were multi-  
168 stemmed shrubs that had an inverted-cone canopy and no trunk, with the branches running  
169 obliquely from the base. *C. korshinskii* usually grew to 2 m and had pinnate compound leaves  
170 with 12–16 foliates in an opposite or sub-opposite arrangement (Wang et al., 2013). The leaf  
171 of *C. korshinskii* was concave and lanceolate-shaped, with an acute leaf apex and an obtuse  
172 base. Both sides of the leaves were densely sericeous with appressed hairs (Liu et al., 2010).  
173 In comparison, *S. psammophila* usually grew to 3–4 m and had an odd number of strip-shaped  
174 leaves of 2–4 mm in width and 40–80 mm in length. The young leaves were pubescent and  
175 gradually became subglabrous (Chao and Gong, 1999). These two shrub species were planted  
176 approximately twenty years ago, and the two stands share a similar slope of 13–18 °, a size of  
177 3294–4056 m<sup>2</sup>, and an elevation of 1179–1207 m a.s.l. However, the *C. korshinskii*  
178 experimental stand had a 224 °aspect with a loess ground surface, whereas the *S. psammophila*  
179 experimental stand had a 113 °aspect with a sand ground surface.

180  
181 Fig. 1. Location of the experimental stands and facilities for stemflow measurements of *C.*

182 *korshinskii* and *S. psammophila* at the Liudaogou catchment in the Loess Plateau of China.  
183

## 184 2.2 Field experiments

185 Field experiments were conducted during the rainy seasons of 2014 (July 1 to October 3)  
186 and 2015 (June 1 to September 30) to measure the [rainfall meteorological](#) characteristics, plant  
187 traits and stemflow. To avoid the effects of gully micro-geomorphology on [meteorological](#)  
188 recording ~~the rainfall characteristics~~, we installed an Onset® (Onset Computer Corp., Bourne,  
189 MA, USA) RG3-M tipping bucket rain gauge (0.2 mm per tip) at each experimental stand.  
190 Three 20-cm-diameter rain gauges were placed around to adjust the inherent underestimating  
191 of automatic precipitation recording (Groisman and Legates, 1994). ~~Then,~~ [Then, the rainfall](#)  
192 [characteristics, e.g.,](#) rainfall duration (RD, h), rainfall interval (RI, h), the average rainfall  
193 intensity (I, mm h<sup>-1</sup>), the maximum rainfall intensity in 5 min (I<sub>5</sub>, mm h<sup>-1</sup>), 10 min (I<sub>10</sub>, mm h<sup>-1</sup>)  
194 and 30 min (I<sub>30</sub>, mm h<sup>-1</sup>) could be calculated accordingly. In this study, the individual rainfall  
195 events were greater than 0.2 mm and separated by a period of at least four hours without rain  
196 (Giacomin and Trucchi, 1992). [Besides, a meteorological stations was also installed at each](#)  
197 [experimental stand to record other meteorological characteristics \(Fig. 1\), e.g., wind speed \(WS,](#)  
198 [m s<sup>-1</sup>\) and direction \(WD, °\) \(Model 03002, R. M. Young Company, Traverse City, Michigan,](#)  
199 [USA\), the air temperature \(T, °C\) and humidity \(H, %\) \(Model HMP 155, Vaisala, Helsinki,](#)  
200 [Finland\), and the solar radiation \(SR, kw m<sup>-2</sup>\) \(Model CNR 4, Kipp & Zonen B.V., Delft, the](#)  
201 [Netherland\).](#)

202 *C. korshinskii* and *S. psammophila*, as modular organisms and multi-stemmed shrub  
203 species, have branches of that ~~exist as independent individuals. Therefore, we focused on the~~  
204 ~~inter- and intra-specific branch stemflow~~ [seek their own survival goals and compete with each](#)  
205 [other for lights and water \(Firn, 2004; Allaby, 2010\). They are ideal experiment objects to](#)  
206 [conduct stemflow study at the branch scale. Therefore, we focused on branch stemflow and](#)  
207 [ignored the canopy variance](#) by experimenting on sample shrubs that had a similar canopy

208 structure. Four mature shrubs were selected for *C. korshinskii* (designated as C1, C2, C3 and  
209 C4) and *S. psammophila* (designated as S1, S2, S3 and S4) for the stemflow measurements.  
210 They had isolated canopies, similar intra-specific canopy heights and ~~canopy~~ areas, e.g.,  $2.1 \pm$   
211  $0.2$  m and  $5.141 \pm 0.263$  m<sup>2</sup> for C1–C4, and  $3.5 \pm 0.2$  m and  $21.354 \pm 5.212$  m<sup>2</sup> for S1–S4.  
212 We measured the morphological characteristics of all the 180 branches of C1–C4 and all the  
213 261 branches of S1–S4, including the branch basal diameter (BD, mm), branch length (BL,  
214 cm) and branch inclination angle (BA, °). The leaf area index (LAI) and the foliage orientation  
215 (MTA, the mean tilt angle of leaves) were measured using LiCor® (LiCor Biosciences Inc.,  
216 Lincoln, NE, USA) 2200C plant canopy analyser approximately twice a month.–

217 A total of 53 branches of *C. korshinskii* (17, 21, 7, 8 for the basal diameter categories of  
218 5–10 mm, 10–15 mm, 15–18 mm and >18 mm, respectively) and 98 branches of *S.*  
219 *psammophila* (20, 30, 20 and 28 branches at the BD categories 5–10 mm, 10–15 mm, 15–18  
220 mm and >18 mm, respectively) were selected for stemflow measurements following the criteria:  
221 1) no intercrossing stems; 2) no turning point in height from branch tip to the base; (Dong, et  
222 al., 1987); 3) representativeness in amount and branch size. Stemflow was collected using  
223 aluminum foil collars, which was fitted around the entire branch circumference and close to  
224 the branch base and sealed by neutral silicone caulking (Fig. 4;1). Nearly all sample branches  
225 were selected on the skirts of the crown, where was more convenient for installation and made  
226 the sample branches limited shading by other branches lying above as well. Associated with  
227 the limited external diameter of foil collars, that minimized the accessing of throughfall (both  
228 free and released). A 0.5-cm-diameter PVC hose led the stemflow to lidded containers. The  
229 stemflow volume yield was measured within two hours after the rainfall ended during the  
230 daytime; if the rainfall ended at night, we took the measurement early the next morning. After  
231 completing measurements, we return stemflow back to the branch base to mitigate the  
232 unnecessary drought stress for the sample branches. By doing so, we tried the best to measure

233 [the authentic stemflow yield at branch scale with least unnecessary disturbance, including the](#)  
234 [effects of free and released throughfall on stemflow measurements in this manuscript.](#)

235 [Besides, the controlled experiment with foliated and manually defoliated shrubs was](#)  
236 [conducted during the rainy season of 2015 for \*C. korshinskii\* \(five rain events from September](#)  
237 [18 to September 30\) and for \*S. psammophila\* \(ten rain events from August 2 to September 30\)](#)  
238 [\(Fig. 2\). Considering the workload to remove all the leaves of 85 branches and 94 branches at](#)  
239 [C. korshinskii \(designated as C5\) and S. psammophila \(designated as S5\) nearly twice a month,](#)  
240 [only one shrub individual was selected with similar intra-specific canopy height and area \(2.1](#)  
241 [m and 5.8 m<sup>2</sup> for C5, 3.3 m and 19.9 m<sup>2</sup> for S5\) as other sampled shrubs. A total of 10 branches](#)  
242 [of C5 \(3, 3 and 4 branches at the BD categories 5–10 mm, 10–15 mm and >15 mm\), and 17](#)  
243 [branches of S5 \(4, 5 and 7 branches at the BD categories 5–10 mm, 10–15 mm and >15 mm\)](#)  
244 [were selected for stemflow measurements. Given a limited amount of sample branches and](#)  
245 [rainfall events, stemflow measurements in this experiment were just used for a comparison](#)  
246 [with that of the foliated shrubs, but not for a quantitative analysis with meteorological](#)  
247 [characteristics and plant traits. If no specific stating, it was important to notice that the stemflow](#)  
248 [yield and efficiency in this study referred to those of the foliated shrubs.](#)

249  
250 [Fig. 2. The controlled experiment for stemflow yield between the foliated and manually](#)  
251 [defoliated shrubs.](#)

252  
253 Another three shrubs of each species were destructively measured for biomass and leaf  
254 traits. They had similar canopy heights and areas as those of the shrubs for which the stemflow  
255 was measured and were designated as ~~C5–C7~~C6–C8 (2.0–2.1 m and 5.~~84–8~~6.778 m<sup>2</sup>) and ~~S5–~~  
256 ~~S7~~S6–S8 (3.0–3.4 m and 15.~~43–4~~19.202 m<sup>2</sup>), thus allowing the development of allometric  
257 models for the estimation of the corresponding biomass and leaf traits of C1–~~C4~~C5 and S1–  
258 ~~S4~~S5 (Levia and Herwitz, 2005; Siles et al., 2010a, ~~2010bb~~); Stephenson et al., 2014). A total  
259 of 66 branches for ~~C5–C7~~C6–C8 and 61 branches for ~~S5–S7~~S6–S8 were measured ~~when the~~

260 ~~shrubs showed maximum vegetative growth once~~ during mid-August for the biomass of leaves  
 261 and stems (BML and BMS, g), the leaf area of the branches (LAB, cm<sup>2</sup>), and the leaf numbers  
 262 of the branches (LNB), ~~when the shrubs showed maximum vegetative growth~~. The BML and  
 263 BMS were weighted after oven-drying of 48 hours. The detailed measurements have been  
 264 reported in Yuan et al., (2016). The validity of the allometric models was verified by measuring  
 265 another 13 branches of ~~C5-C7~~C6-C8 and 14 branches of ~~S5-S7~~S6-S8.

266

### 267 2.3 Calculations

268 Biomass and leaf traits were estimated by allometric models as an exponential function of  
 269 BD (Siles et al., 2010a, b; Jonard et al., 2006):

$$270 \quad \text{PT}_e = a * \text{BD}^b \quad \text{PT}_e = a * \text{BD}^b \quad (1)$$

271 where  $a$  and  $b$  are constants, and  $\text{PT}_e$  refers to the estimated plant traits BML, BMS, LAB and  
 272 LNB. The other plant traits could be calculated accordingly, including individual leaf area of  
 273 branch ( $\text{ILAB} = 100 * \text{LAB} / \text{LNB}$ , mm<sup>2</sup>), ~~the percentage of stem biomass to that of branch~~  
 274 ~~( $\text{PBMS} = \text{BMS} / (\text{BML} + \text{BMS}) * 100\%$ , %), specific leaf weight ( $\text{SLW} = \text{BML} / \text{LAB}$ , g cm<sup>-2</sup>),~~  
 275 ~~Huber value ( $\text{HV} = \text{BBA} / \text{LAB} = 3.14 * \text{BD}^2 / (400 * \text{LAB})$ , unitless, where BBA is the branch~~  
 276 ~~basal area (cm<sup>2</sup>)) and the percentage of stem biomass to that of branch ( $\text{PBMS} =$~~   
 277  ~~$\text{BMS} / (\text{BML} + \text{BMS}) * 100\%$ , %). Besides, the total stem surface area of individual branch (SA)~~  
 278 ~~was computed representing by that of the main stem, which was idealized as the cone ( $\text{SA} =$~~   
 279  ~~$\pi * \text{BD} * \text{BL} / 20$ , cm<sup>2</sup>). So that, specific surface area representing with LAB ( $\text{SSAL} =$~~   
 280  ~~$\text{LAB} / (\text{BML} + \text{BMS})$ , cm<sup>2</sup> g<sup>-1</sup>) and in SA ( $\text{SSAS} = \text{SA} / (\text{BML} + \text{BMS})$ , cm<sup>2</sup> g<sup>-1</sup>) could be~~  
 281 ~~calculated. It was important to notice that this method underestimated the real stem surface~~  
 282 ~~area by ignoring the collateral stems and assuming main stem as the standard cone, so the SA~~  
 283 ~~and SSAS would not feed into the quantitative analysis, but apply to reflect a general~~  
 284 ~~correlation with  $SF_b$  in this study.~~



285 In this study, stemflow ~~production yield~~ was defined as the branch ~~volume production~~  
 286 (hereafter “stemflow production”,  $SF_b$ , mL), the equivalent water depth on the basis of shrub  
 287 canopy area (hereafter “stemflow depth”,  $SF_d$ , mm), and the stemflow percentage of the  
 288 incident precipitation amount (hereafter “stemflow percentage”, SF%, %):

$$289 \quad \cancel{SF_d = 10 * \sum_{i=1}^n SF_{b_i} / CA} \quad SF_d = 10 * \sum_{i=1}^n SF_{b_i} / CA \quad (2)$$

$$290 \quad SF\% = (SF_d / P) * 100\% \quad (3)$$

291 where  $SF_{b_i}$  is the volume of stemflow ~~production yield~~ of branch  $i$  (mL), CA is the canopy area  
 292 ( $\text{cm}^2$ ),  $n$  is the number of branches, and  $P$  is the incident precipitation amount (mm).

293 Stemflow productivity (SFP,  $\text{mL g}^{-1}$ ) was expressed as the  $SF_b$  (mL) of unit branch  
 294 biomass (g) and represented the stemflow ~~production~~ efficiency of different-sized branches in  
 295 ~~terms of energy conservation association with biomass allocation pattern~~:

$$296 \quad SFP = SF_b / (BML + BMS) \quad (4)$$

297 The funnelling ratio (FR) was computed as the quotient of  $SF_b$  and the product of  $P$  and  
 298 BBA (Herwitz, 1986). A FR with a value greater than 1 indicated a positive effect of the  
 299 canopy on the stemflow ~~production yield~~ (Carlyle-Moses and Price, 2006). The value of ( $P *$   
 300 BBA) equals to the precipitation amount that would have been caught by the rain gauge  
 301 occupying the same basal area ~~at the~~ in a clearing:

$$302 \quad FR = 10 * SF_b / (P * BBA) \quad (5)$$

303

## 304 2.4 Data analysis

305 A Pearson correlation analysis was performed to test the relationship between  $SF_b$  and each  
 306 of the ~~rainfall meteorological~~ characteristics and plant traits. Significantly correlated variables  
 307 were further tested with a partial correlation analysis for their separate effects on  $SF_b$ . Then,  
 308 the qualified variables were fed into a stepwise regression with forward selection to identify  
 309 the most influential bio-/abiotic factors (Carlyle-Moses and Schooling, 2015; Yuan et al., 2016).

310 Similarly to a principal component analysis and ridge regression, stepwise regression has  
311 commonly been used because it gets a limited effect of multicollinearity (Návar and Bryan,  
312 1990; Honda et al., 2015; Carlyle-Moses and Schooling, 2015). Moreover, we excluded  
313 variables that had a variance inflation factor (VIF) greater than 10 to minimize the effects of  
314 multicollinearity (O'Brien, 2007). ~~The same analysis method was), and kept the regression~~  
315 ~~model having the least AIC values and largest  $R^2$ . The separate contribution of individual~~  
316 ~~variables to stemflow yield and efficiency was computed by the method of variance partitioning.~~  
317 ~~The same analysis methods were~~ also applied to identify the most influential bio-/abiotic  
318 factors affecting SFP and FR. The level of significance was set at 95% confidence interval ( $p$   
319 = 0.05). The SPSS 20.0 (IBM Corporation, Armonk, NY, USA), Origin 8.5 (OriginLab  
320 Corporation, Northampton, MA, USA), and Excel 2013 (Microsoft Corporation, Redmond,  
321 WA, USA) were used for data analysis.

322

### 323 **3 Results**

#### 324 **3.1 Meteorological characteristics**

325 Stemflow was measured at 36 rainfall events in this study, 18 events (209.8 mm) in 2014  
326 and 18 events (205.3 mm) in 2015, which accounted for 32.7% and 46.2% of total rainfall  
327 events, and 73.1% and 74.9% of total precipitation amount during the experimental period of  
328 2014 and 2015, respectively (Fig. 3). There were 4, 7, 10, 5, 4 and 6 rainfall events at  
329 precipitation categories of  $\leq 2$  mm, 2–5 mm, 5–10 mm, 10–15 mm, 15–20 mm, and  $>20$  mm,  
330 respectively. The average rainfall intensity of incident rainfall events was  $6.3 \pm 1.5$  mm  $h^{-1}$ ,  
331 and the average value of  $I_5$ ,  $I_{10}$  and  $I_{30}$  were  $20.3 \pm 3.9$  mm  $h^{-1}$ ,  $15.0 \pm 2.9$  mm  $h^{-1}$  and  $9.2 \pm 1.6$   
332 mm  $h^{-1}$ , respectively. RD and RI were averaged  $5.5 \pm 1.1$  h and  $63.1 \pm 8.2$  h. The average T, H,  
333 SR, WS and WD were  $16.5 \pm 0.5$  °C,  $85.9\% \pm 2.2\%$ ,  $48.5 \pm 11.2$  kw  $m^{-2}$ ,  $2.2 \pm 0.2$  m  $s^{-1}$  and  
334  $167.1 \pm 13.9$ , respectively.

335

336 **Fig. 3.1 Species-specific variation of plant traits**

337 ~~According to the *Flora of China* and the field observation, both *C. korshinskii* and *S.*~~  
338 ~~*psammophila* had an inverted cone canopy and no trunk, with the branches running obliquely~~  
339 ~~from the base. *S. psammophila* usually grew to 3–4 m and had an odd number of strip-shaped~~  
340 ~~leaves of 2–4 mm in width and 40–80 mm in length. The young leaves were pubescent and~~  
341 ~~gradually became subglabrous (Chao and Gong, 1999) (Fig. 2). In comparison, *C. korshinskii*~~  
342 ~~usually grew to 2 m and had pinnate compound leaves with 12–16 foliates in an opposite or~~  
343 ~~sub-opposite arrangement (Wang et al., 2013). The leaf~~  
344 ~~3. Meteorological characteristics of~~  
345 ~~rainfall events for stemflow measurements during the 2014 and 2015 rainy seasons.~~

345

346 **3.2 Species-specific variation of plant traits**

347 ~~was concave and lanceolate-shaped, with an acute leaf apex and an obtuse base. Both~~  
348 ~~sides of the leaves were densely sericeous with appressed hairs (Liu et al., 2010) (Fig. 2).~~

349

350 ~~Fig. 2. Comparison of leaf morphologies of *C. korshinskii* and *S. psammophila*.~~

351

352 Allometric models were developed to estimate the biomass and leaf traits of the branches  
353 of *C. korshinskii* and *S. psammophila* measured for stemflow. The quality of the estimates was  
354 verified by linear regression. As shown in Fig. 34, the regression of LAB, LNB, BML and BMS  
355 of *C. korshinskii* had an approximately 1:1 slope (0.99 for the biomass indicators and 1.04 for  
356 the leaf traits) and an  $R^2$  value of 0.93–0.95. According to Yuan et al., (2016), the regression  
357 of *S. psammophila* had a slope of 1.13 and an  $R^2$  of 0.92. Therefore, those allometric models  
358 were appropriate.

359

360 Fig. 34. Verification of the allometric models for estimating the biomass and leaf traits of *C.*  
361 *korshinskii*. BML and BMS refer to the biomass of the leaves and stems, respectively, and LAB  
362 and LNB refer to the leaf area and the number of branches, respectively.

363

364 *C. korshinskii* had a similar average branch size and angle, but a shorter branch length  
365 than did *S. psammophila*, e.g.,  $12.485 \pm 4.162$  mm vs.  $13.737 \pm 4.364$  mm,  $60 \pm 18^\circ$  vs.  $60 \pm$   
366  $20^\circ$ , and  $161.5 \pm 35.0$  cm vs.  $267.3 \pm 49.7$  cm, respectively. Regarding branch biomass  
367 accumulation, *C. korshinskii* had a smaller BML (an average of  $19.939 \pm 10.818$  g) and a larger

368 BMS (an average  $141.071 \pm 110.788$  g) than did *S. psammophila* (an average of  $27.859 \pm$   
 369  $20.717$  g and  $130.657 \pm 101.354$  g, respectively). Both the BML and BMS increased with  
 370 increasing branch size for these two shrub species. When expressed as a proportion, *C.*  
 371 *korshinskii* had a larger PBMS than ~~that of~~ *S. psammophila* in all the BD categories. The  
 372 PBMS-specific difference increased with an increasing branch size, ranging from 1.242% for  
 373 the 5–10-mm branches to 7.222% for the >18-mm branches.

374 Although an increase in LAB and LNB and a decrease in ILAB, SSAL and SSAS were  
 375 observed for both shrub species with ~~an increase in~~ increasing branch size, *C. korshinskii* had a  
 376 larger LAB (an average of  $2509.051 \pm 1355.303$  cm<sup>2</sup>) ~~and~~ LNB (an average of  $12479 \pm 8409$ )  
 377 and SSAL ( $18.2 \pm 0.5$  cm<sup>2</sup> g<sup>-1</sup>), but a smaller ILAB (an average of  $21.94 \pm 2.999 \pm 3.0$  mm<sup>2</sup>)  
 378 and SSAS ( $2.5$  cm<sup>2</sup> g<sup>-1</sup>) than did *S. psammophila* for each BD level (~~Table 1~~) averaged  $1797.9$   
 379  $\pm 1118.0$  g,  $2404 \pm 1922$ ,  $12.7 \pm 0.4$  cm<sup>2</sup> g<sup>-1</sup>,  $93.1 \pm 27.8$  mm<sup>2</sup> and  $5.1 \pm 0.3$  cm<sup>2</sup> g<sup>-1</sup>) (Table 1).

380 The inter-specific differences in the leaf traits decreased with increasing branch size. The  
 381 largest difference occurred for the 5–10-mm branches, e.g., LNB and LAB were 12.212-fold  
 382 and 2.414-fold larger for *C. korshinskii*, and ILAB was 5.323-fold larger for *S. psammophila*.  
 383 ~~*C. korshinskii* had a larger SLW (an average of  $126.04 \pm 0.29$  g cm<sup>-2</sup>) and HV ( $0.0507 \pm 0.0064$ )~~  
 384 ~~than did *S. psammophila* ( $73.87 \pm 14.52$  g cm<sup>-2</sup> and  $0.0009 \pm 0.0001$ , respectively). As the~~  
 385 ~~branch size increased, the SLW of *S. psammophila* decreased from  $95.62$  g cm<sup>-2</sup> for the 5–10-~~  
 386 ~~mm branches to  $58.07$  g cm<sup>-2</sup> for the >18 mm branches, but the HV of *C. korshinskii* increased~~  
 387 ~~from  $0.0438$  to  $0.0615$ .~~

388  
 389 Table 1. Comparison of branch morphology, biomass and leaf traits of *C. korshinskii* and *S.*  
 390 *psammophila*.

391

### 392 **3.23 Stemflow production yield of the foliated and defoliated *C. korshinskii* and *S.*** 393 ***psammophila***

394 In this study, stemflow production yield was expressed as  $SF_b$  on the branch scale and  $SF_d$

395 and SF% on the shrub scale. ~~The~~For the foliated shrubs,  $SF_b$  was ~~an average of~~averaged 290.6  
396 mL and 150.3 mL for individual branches of *C. korshinskii* and *S. psammophila*, respectively,  
397 ~~per incident rainfall events during the 2014 and 2015 rainy seasons~~. The  $SF_b$  was positively  
398 correlated with the branch size and precipitation of these two shrub species. As the branch size  
399 increased,  $SF_b$  increased from ~~the average of~~ 119.0 mL for the 5–10- mm branches to 679.9  
400 mL for the ~~>20-18~~ mm branches for *C. korshinskii* and from 43.0 mL to 281.8 mL for the  
401 corresponding BD categories of *S. psammophila*. However, with increasing precipitation, a  
402 larger intra-specific difference in  $SF_b$  was observed, which increased from ~~the average of~~ 28.4  
403 mL during rains  $\leq 2$  mm to 771.4 mL during rains  $>20$  mm for *C. korshinskii* and from 9.0 mL  
404 to 444.3 mL for the corresponding precipitation categories of *S. psammophila*. The intra-  
405 specific differences in  $SF_b$  were significantly affected by the rainfall characteristics and the  
406 plant traits. Up to 2375.9 mL ~~of stemflow~~ was ~~measured~~averaged for the  $>18$ - mm branches of  
407 *C. korshinskii* during rains  $>20$  mm ~~at the 2014 and 2015 rainy seasons~~, but only ~~the average~~  
408  ~~$SF_b$  of~~ 6.8 mL ~~of stemflow~~ occurred for the 5–10- mm branches during rains  $\leq 2$  mm. For  
409 comparison, a maximum  $SF_b$  of 2097.6 mL and a minimum of 1.8 mL were ~~measured~~averaged  
410 for *S. psammophila*.

411 *C. korshinskii* produced a larger  $SF_b$  than did *S. psammophila* for all BD and precipitation  
412 categories, and the inter-specific differences in  $SF_b$  also varied substantially with the rainfall  
413 characteristics and the plant traits. A maximum difference of 4.3-fold larger for the  $SF_b$  of *C.*  
414 *korshinskii* was observed for the  $>18$ - mm branches during rains  $\leq 2$  mm ~~at the 2014 and 2015~~  
415 ~~rainy seasons~~. As the precipitation increased, the  $SF_b$ -specific difference decreased from 3.2-  
416 fold larger for *C. korshinskii* during rains  $\leq 2$  mm to 1.7-fold larger during rains  $>20$  mm. The  
417 largest  $SF_b$ -specific difference occurred for the 5–10- mm branches for almost all precipitation  
418 categories, but no clear trend of change was observed with increasing branch size (Table 2).

419  $SF_d$  and SF% averaged 1.000 mm and 8.0%-% ~~per incident rainfall events during the 2014~~

420 [and 2015 rainy seasons](#), respectively, for individual *C. korshinskii* shrubs and 0.8 mm and 5.5%,  
421 respectively, for individual *S. psammophila* shrubs. These parameters increased with increasing  
422 precipitation, ranging from 0.09 mm and 5.8% during rains  $\leq 2$  mm to [2.646](#) mm and 8.9%  
423 during rains  $>20$  mm for *C. korshinskii* and from [less than](#) 0.01 mm and 0.7% to [2.232](#) mm and  
424 7.9% for the corresponding precipitation categories of *S. psammophila*, respectively.  
425 Additionally, the individual *C. korshinskii* shrubs had a larger stemflow [yield](#) than did *S.*  
426 *psammophila* for all precipitation categories. The ~~maximum~~ differences in  $SF_d$  and SF%  
427 ~~were maximized as a~~ 8.5- and 8.3-fold larger for *C. korshinskii* during rains  $\leq 2$  mm and  
428 decreased with increasing precipitation to 1.2- and 1.1-fold larger during rains  $>20$  mm. \_

429  
430 Table 2. Comparison of stemflow ~~production yield~~ [yield](#) ( $SF_b$ ,  $SF_d$  and SF%) between [the foliated](#) *C.*  
431 *korshinskii* and *S. psammophila*.  
432

433 [While comparing the intra-specific difference of  \$SF\_b\$  between different leaf states,  \$SF\_b\$  of](#)  
434 [the defoliated \*S. psammophila\* was 1.3-fold larger than did the foliated \*S. psammophila\* on](#)  
435 [average, ranging from the 1.1-, 1.0- and 1.4-fold larger for the 5–10 mm, 10–15 mm and >15](#)  
436 [mm branches, respectively. A larger difference was noted during smaller rains \(Table 3\). On](#)  
437 [the contrary,  \$SF\_b\$  of the defoliated \*C. korshinskii\* was averaged 2.5-fold smaller than did the](#)  
438 [foliated \*C. korshinskii\* at all rainfall events. Except for a 1.2-fold larger at the 5–10 mm](#)  
439 [branches, the 3.3-fold smaller of  \$SF\_b\$  was measured at the 10–15 mm and >15 mm branches of](#)  
440 [the defoliated \*C. korshinskii\* than did the foliated \*C. korshinskii\* \(Table 3\). While comparing](#)  
441 [the  \$SF\_b\$ -specific difference at the same leaf states, a smaller  \$SF\_b\$  of the foliated \*S. psammophila\*](#)  
442 [was noted than did the foliated \*C. korshinskii\*. However,  \$SF\_b\$  of the defoliated \*S. psammophila\*](#)  
443 [was 2.0-fold larger than did the defoliated \*C. korshinskii\* on average at nearly all BD categories](#)  
444 [except for the 5–10 mm branches \(Table 3\).](#)

445  
446 [Table 3. Comparison of stemflow yield \( \$SF\_b\$ \) of the foliated and manually defoliated \*C.\*](#)  
447 [korshinskii and \*S. psammophila\*.](#)

448  
449 3.4 Stemflow efficiency of *C. korshinskii* and *S. psammophila*~~3.3 Stemflow production~~  
450 efficiency of *C. korshinskii* and *S. psammophila*

451 **Combined**

452 With the combined results ~~for~~of SFP and FR, ~~the stemflow production~~ efficiency were  
453 assessed for *C. korshinskii* and *S. psammophila*. SFP averaged 1.95 mL g<sup>-1</sup> and 1.19 mL g<sup>-1</sup> for  
454 individual *C. korshinskii* and *S. psammophila* branches, respectively per incident rainfall events  
455 during the 2014 and 2015 rainy seasons (Table 34). As precipitation increased, SFP increased  
456 from 0.19 mL g<sup>-1</sup> during rains ≤2 mm to 5.08 mL g<sup>-1</sup> during rains >20 mm for *C. korshinskii*  
457 and from 0.07 mL g<sup>-1</sup> to 3.43 mL g<sup>-1</sup> for the corresponding precipitation categories for *S.*  
458 *psammophila*. With an increase in branch size, SFP decreased from 2.19 mL g<sup>-1</sup> for the 5–10–  
459 mm branches to 1.62 mL g<sup>-1</sup> for the >18–mm branches of *C. korshinskii* and from 1.64 mL g<sup>-</sup>  
460 <sup>1</sup> to 0.80 mL g<sup>-1</sup> for the corresponding BD categories of *S. psammophila*. Maximum SFP values  
461 of 5.60 mL g<sup>-1</sup> and 4.59 mL g<sup>-1</sup> were recorded for *C. korshinskii* and *S. psammophila*,  
462 respectively. Additionally, *C. korshinskii* had a larger SFP than ~~that of~~did *S. psammophila* for  
463 all precipitation and BD categories. This inter-specific difference in SFP decreased with  
464 increasing precipitation from 2.5-fold larger for *C. korshinskii* during rains ≤2 mm to 1.5-fold  
465 larger during rains >20 mm, and it increased with increasing branch size: from 1.3-fold larger  
466 for *C. korshinskii* for the 5–10–mm branches to 2.0-fold larger for the >18-mm branches.

467  
468 Table 34. Comparison of stemflow productivity (SFP) between the foliated *C. korshinskii* and  
469 *S. psammophila*.

470  
471 FR averaged 172.3 and 69.3 for the individual branches of *C. korshinskii* and *S.*  
472 *psammophila* per rainfall events during the 2014 and 2015 rainy seasons, respectively (Table  
473 45). As the precipitation increased, an increasing trend was observed, ranging from the average  
474 FR of 129.2 during rains ≤2 mm to 190.3 during rains >20 mm for *C. korshinskii* and from the

475 average FR of 36.7 to 96.1 during the corresponding precipitation categories for *S.*  
476 *psammophila*. FR increased with increasing BA from the average of 149.9 for the  $\leq 30^\circ$ -  
477 branches to 198.2 for the  $>80^\circ$  branches of *C. korshinskii* and from the average of 55.0 to 85.6  
478 for the corresponding BA categories of *S. psammophila*. Maximum FR values of 276.0 and  
479 115.7 were recorded for *C. korshinskii* and *S. psammophila*, respectively. Additionally, *C.*  
480 *korshinskii* had a larger FR than *S. psammophila* for all precipitation and BA categories. The  
481 inter-specific difference in FR decreased with increasing precipitation from the 3.5-fold larger  
482 for *C. korshinskii* during rains  $\leq 2$  mm to 2.0-fold larger during rains  $>20$  mm, and it decreased  
483 with an increase in the branch inclination angle: from 2.7-fold larger for *C. korshinskii* for the  
484  $\leq 30^\circ$  branches to 2.3-fold larger for the  $>80^\circ$  branches.

485

486 Table 45. Comparison of the funnelling ratio (FR) ~~for~~ between the foliated *C. korshinskii* and *S.*  
487 *psammophila*.

488

### 489 **3.45 Bio-/abiotic influential factors of stemflow production yield and production** 490 **efficiency**

491 For both *C. korshinskii* and *S. psammophila*, BA was the only plant trait that had no  
492 significant correlation with  $SF_b$  ( $r < -0.13$ ,  $p > 0.05$ ) as indicated by Pearson correlation analysis.

493 The separate effects of the remaining plant traits were verified by using a partial correlation

494 analysis, but BL, ILAB and PBMS failed this test. The remaining rest of plant traits, including

495 BD, LAB, LNB, BML and BMS, were regressed with  $SF_b$  by using the forward selection

496 method. Biomass was finally identified as the most important biotic indicator that affected

497 stemflow, which behaved differently in *C. korshinskii* for BMS and in *S. psammophila* for

498 BML. ~~The same analysis methods indicated that the precipitation amount was the most~~

499 ~~important rainfall characteristic that affected stemflow in these two shrub species~~ The same

500 methods were applied to analyse the influence of meteorological characteristics on  $SF_b$  of these

501 two shrub species. Tested by the Pearson correlation and partial correlation analyses,  $SF_b$



502 [related significantly with the precipitation amount,  \$I\_{10}\$ , RD and H for \*C. korshinskii\*, and with](#)  
503 [P,  \$I\_5\$ ,  \$I\_{10}\$ ,  \$I\_{30}\$  for \*S. psammophila\*. The step-wise regression finally identified the precipitation](#)  
504 [amount as the most influential meteorological characteristics for the two shrub species.](#)  
505 [Although  \$I\_{10}\$  was another influential factor for \*C. korshinskii\*, it only made a 15.6% contribution](#)  
506 [to the  \$SF\_b\$  on average.](#)

507  $SF_b$  and  $SF_d$  had a good linear relationship with the precipitation amount ( $R^2 \geq 0.93$ ) for  
508 both shrub species (Fig. 45). The >0.9-mm and >2.1-mm rains were required to start  $SF_b$  for  
509 *C. korshinskii* and *S. psammophila*, respectively, results consistent with the 0.8-mm and 2.0-  
510 mm precipitation threshold calculated with  $SF_d$ . Moreover, the precipitation threshold  
511 increased with increasing branch size. The precipitation threshold values were 0.697 mm, 0.727  
512 mm, 1.354 mm and 0.848 mm for the 5–10-mm, 10–15-mm, 15–18-mm and >18-mm  
513 branches of *C. korshinskii*, respectively, and 1.1 mm, 1.6 mm, 2.0 mm and 2.4 mm for the  
514 branches of *S. psammophila*, respectively.

515 The SF% of the two shrub species also increased with precipitation, but was inversely  
516 proportional and gradually approached asymptotic values of 9.1% and 7.7% for *C. korshinskii*  
517 and *S. psammophila*, respectively. As shown in Fig. 45, fast growth was evident during rains  
518  $\leq 10$  mm, but SF% slightly increased afterwards for both shrub species.

519  
520 Fig. 45. Relationships of branch stemflow ~~production volume~~ ( $SF_b$ ), shrub stemflow depth ( $SF_d$ )  
521 and stemflow percentage (SF%) with precipitation amount (P) for *C. korshinskii* and *S.*  
522 *psammophila*.

523  
524 Precipitation amount was the most important factor affecting SFP and FR for *C. korshinskii*  
525 and *S. psammophila*, but the most important biotic factor was different. BA was the most  
526 influential plant trait that affected FR, ~~and of these two shrub species at all precipitation levels.~~  
527 ILAB was the most important plant trait affecting SFP during rains  $\leq 10$  mm, ~~of these species.~~  
528 However, during ~~heavy~~ heavier rain >15 mm, BD and PBMS were the most significant biotic

529 factors for *C. korshinskii* and *S. psammophila*, respectively. For these two shrubs species, it  
530 was leaf trait (ILAB) and branch traits (biomass allocation pattern and branch size) that played  
531 bigger roles on SFP during smaller rains  $\leq 10$  mm and heavier rains  $> 15$  mm, respectively. So,  
532 it seemed that the rainfall interception process of leaves controlled SFP during the smaller rains,  
533 which functioned as the water resource for stemflow production. But while water supply was  
534 adequate during heavier rains, the stemflow delivering process of branches might be the  
535 bottleneck.

536

## 537 **4 Discussion**

### 538 **4.1 Effective utilization Differences of precipitation via stemflow production yield and** 539 **efficiency between two shrub species**

540 Stemflow yield in *C. korshinskii* and *S. psammophila* increased with increasing  
541 precipitation and branch size at both the branch ( $SF_b$ ) and shrub scales ( $SF_d$  and  $SF\%$ ). However,  
542 *C. korshinskii* had larger  $SF_b$ ,  $SF_d$  and  $SF\%$  values than did *S. psammophila* for all precipitation  
543 categories- (Table 2). Although the greatest stemflow production yield was observed during  
544 rains  $> 20$  mm for the two shrub species, the inter-specific differences of  $SF_b$ ,  $SF_d$  and  $SF\%$   
545 were highest at 3.2-, 8.5- and 8.3-fold larger for *C. korshinskii* during rains  $\leq 2$  mm, which  
546 indicated that *C. korshinskii* utilized precipitation far more effectively during rains  $\leq 2$  mm at  
547 the branch and shrub scale. These data indicate that stemflow was highly important for the  
548 survival of the xerophytic shrubs in extreme drought, respectively. Additionally, *C. korshinskii*  
549 had a 2.8-fold larger  $SF_b$  than ~~that of~~ *S. psammophila* for the 5–10-mm branches. Therefore,  
550 compared with *S. psammophila*, more effectively might *C. korshinskii* ~~utilize~~ employ  
551 precipitation via greater stemflow production yield, particularly the 5–10-mm young shoots  
552 during rains  $\leq 2$  mm.

553 The FR values indicated the stemflow efficiency with which individual branches could

554 intercept and ~~channel~~ deliver raindrops (Siegert and Levia, 2014), ~~thus leading to greater~~  
555 ~~stemflow production.~~ The average FR of individual branches of *S. psammophila* was 69.3 per  
556 individual rainfall during the 2014 and 2015 rainy seasons, which agreed well with the 69.4 of  
557 *S. psammophila* in the Mu Us sandland ~~in~~ of China (Yang et al., 2008). The average FR ~~for~~ of  
558 individual branches of *C. korshinskii* was 173.3 in this study, in contrast to the values of 156.1  
559 (Jian et al., 2014) and 153.5 (Li et al., 2008) for *C. korshinskii* ~~in the~~ at western Loess Plateau  
560 of China. Furthermore, these two shrub species had a larger FR than those of many other  
561 endemic xerophytic shrubs ~~from~~ at water-stressed ecosystems, e.g., *Tamarix ramosissima* (24.8)  
562 (Li et al., 2008), *Artemisia sphaerocephala* (41.5) (Yang et al., 2008), *Reaumuria soongorica*  
563 (53.2) (Li et al., 2008), *Hippophae rhamnoides* (62.2) (Jian et al., 2014). ~~Therefore, both~~ Both  
564 of *C. korshinskii* and *S. psammophila* utilized/employed precipitation in a relatively an efficient  
565 manner ~~by producing to produce~~ stemflow, and *C. korshinskii* produced stemflow even more  
566 efficiently. ~~The FR-specific difference achieved a maximum of 3.5-fold larger~~ for *C.*  
567 ~~*korshinskii*~~ all precipitation categories particularly during rains  $\leq 2$  mm ~~and, the inter-specific~~  
568 difference of which decreased with increasing precipitation ~~to 2.0-fold larger during rains  $> 20$~~   
569 ~~mm.~~ (Table 5).

570 ~~SFP characterized~~ The higher stemflow ~~production in terms~~ efficiency of energy-  
571 ~~conservation.~~ *C. korshinskii* ~~had a larger SFP than *S. psammophila*~~ for all the precipitation and  
572 BD categories, ~~and during rains  $\leq 2$  mm, the SFP-specific difference~~ was maximized to 2.5-fold  
573 larger for *C.* ~~also supported by SFP (Table 4), which characterized stemflow efficiency of~~  
574 different-sized *korshinskii*. ~~Additionally, the 5–10 mm branches had the largest average SFP of~~  
575 2.2 mL g<sup>-1</sup> and 1.6 mL g<sup>-1</sup> in return, which, in association with biomass allocating patterns.  
576 Besides, for both of *C. korshinskii* and *S. psammophila*, the highest SFP was noted at the 5–10  
577 mm branches, 2.19 mL g<sup>-1</sup> vs. 1.64 mL g<sup>-1</sup> on average, and the maximum of 5.60 mL g<sup>-1</sup> vs.  
578 4.59 mL g<sup>-1</sup> during rains  $> 20$  mm, was maximized to 5.6 mL g<sup>-1</sup> and 4.6 mL g<sup>-1</sup> for *C.* (Table

579 4).

580 In conclusion ~~*C. korshinskii* and *S. psammophila*, respectively (Table 3). Investing biomass into~~  
581 ~~young shoots provides considerable water benefits for xerophytic shrubs. Therefore, compared~~  
582 ~~with *S. psammophila*, more efficiently might *C. korshinskii* utilize precipitation by~~  
583 ~~producing~~employing different-sized rains to produce stemflow in a greater stemflow amount  
584 and more efficient manner. That meant a lot for xerophytic shrubs particularly for 5–10 mm  
585 young shoots during the rainy season. Because, during rains  $\leq 2$  mm this period, they foliate,  
586 bloom, reproduce and compete with each other for lights and water. The great water demand  
587 made them sensitive to the precipitation variation. It was common for dryland shrubs to  
588 experience several wetting-drying cycles (Cui and Caldwell, 1997) when rains are sporadic.  
589 The hierarchy of rainfall events has a corresponding hierarchy of ecological responses at the  
590 arid environment (Schwinning and Sala, 2004), including the rapid root nutrient uptaking  
591 (Jackson and Caldwell, 1991), root elongating (Brady et al., 1995), Mycorrhizal hyphae  
592 infection (Jasper et al., 1993), etc. That benefited the formation and maintenance of “fertile  
593 islands” (Whitford et al., 1997), “resource islands” (Reynolds et al., 1999) or “hydrologic  
594 islands” (Rango et al., 2006). Given that the stemflow was well documented as an important  
595 source of rhizosphere soil moisture at dryland ecosystems (Dunkerley, 2000; Yang, 2010;  
596 Navar, 2011; Li, et al., 2013), *C. korshinskii* produced stemflow with a greater amount in an  
597 more efficient manner might be of great importance in employing precipitation to acquire water  
598 (Murakami, 2009) at dryland ecosystems.

599 ~~Stemflow may preferentially incorporate precipitation into the rhizosphere, retaining it as~~  
600 ~~relatively stable soil moisture (Martinez Meza and Whitford, 1996) and increasing drought~~  
601 ~~tolerance, particularly during long periods without rain. It was particularly significant that~~  
602 ~~young shoots were favoured in the presence of a greater water supply. Greater stemflow~~  
603 ~~production provided *C. korshinskii* with greater drought tolerance and a competitive edge in~~

604 ~~water-stressed ecosystems.~~

#### 606 ~~4.2 Utilization of more rains via a low~~

#### 607 4.2 Effects of precipitation threshold to startproduce stemflow

608 Precipitation below the threshold wet the canopy and ~~then~~finally evaporated, so it  
609 ~~theoretically~~ did not generate stemflow. The  $\leq 2.5$ -mm rains were entirely intercepted and  
610 evaporated to the atmosphere for the xerophytic Ashe juniper communities at the central Texas  
611 of USA (Owens et al., 2006), as well as most of the  $\leq 5$ -mm rains, particularly at the beginning  
612 raining stage for xerophytic shrubs (*S. psammophila*, *Hedysarum scoparium*, *A.*  
613 *sphaerocephala* and *Artemisia ordosica*) at the Mu Us sandland of China (Yang, 2010). The  
614 precipitation threshold ~~varied with factors such as the eco-zone, the PFT, the canopy structure,~~  
615 ~~and the branch architecture. A greater precipitation threshold partly explained why the SF% of~~  
616 ~~trees was smaller than that of shrubs (Llorens and Domingo, 2007). Particularly, the~~  
617 ~~precipitation threshold~~ of xerophytic shrub species was as small as 0.3 mm for *T. vulgaris* at  
618 ~~the~~ northern Lomo Herrero of Spain (Belmonte and Romero, 1998), but up to 2.7 mm for *A.*  
619 *farnesiana* at Linares of Mexico (Návar and Bryan, 1990). In this study, at least a 0.9-mm  
620 rainfall was necessary to initiate stemflow in *C. korshinskii*, which was in the range of 0.4–  
621 1.4 mm at the precipitation threshold for *C. korshinskii* (Li et al., 2009; Wang et al., 2014). This  
622 result was consistent with the 0.8 mm for *R. officinalis* at ~~the~~ northern Lomo Herrero of Spain  
623 (Belmont and Romero, 1998) and 0.6 mm for *M. squamosa* at Qinghai-Tibet plateau of China  
624 (Zhang et al., 2015). Comparatively, *S. psammophila* needed a 2.1-mm precipitation threshold  
625 to initiate stemflow, which was consistent with the 2.2 mm threshold of *S. psammophila* in the  
626 Mu Us desertsandland (Li et al., 2009) and the 1.9 mm threshold for *R. soongorica* at ~~the west~~  
627 ~~ofwestern~~ Loess Plateau (Li et al., 2008) and the 1.8 mm threshold for *A. ordosica* at ~~the~~  
628 Tengger desert of China (Wang et al., ~~2014~~2013). Generally, for many xerophytic shrub species,

629 the precipitation threshold ~~usually generally~~ ranges ~~between in~~ 0.4–2.2 mm, ~~which is in~~  
630 ~~accordance with the findings for stemflow production ( $SF_b$ ,  $SF_d$  and  $SF\%$ ) and the production~~  
631 ~~efficiency ( $SFP$  and  $FR$ ), thus indicating that rains  $\leq 2$  mm were particularly significant for the~~  
632 ~~endemic plants in water-stressed ecosystems.~~

633 Scant rainfall was the most prevalent type in arid and semiarid regions. Rains  $\leq 5$  mm  
634 accounted for 74.8% of the annual rainfall events and 27.7% of the annual precipitation amount  
635 at the Anjiapo catchment ~~in the at~~ western Loess Plateau of China (with a MAP of 420 mm)  
636 (Jian et al., 2014). While at Haizetan ~~in the south of at~~ southern Mu Us sandland of China (with  
637 a MAP of 394.7 mm), rains  $\leq 5$  mm accounted for 49.0% of all the rainfall events and 13.8%  
638 of the total precipitation amount of rainy season (lasting from May to September) (Yang, 2010).  
639 Additionally, rains  $\leq 2.545$  mm accounted for 60% of the total rainfall events and 5.4% of the  
640 total precipitation amount at ~~the~~ eastern Edwards Plateau, the central Texas of USA (with a  
641 MAP of 600–900 mm) (Owens et al., 2006). In this study, rains  $\leq 2$  mm accounted for 45.7%  
642 of all the rainfall events and 7.2% of the precipitation amount during the 2014 and 2015 rainy  
643 seasons. In general, *C. korshinskii* and *S. psammophila* produced stemflow during 71 (75.5%  
644 of the total rainfall events) and 51 rainfall events (54.3% of the total rainfall events),  
645 respectively. Because the precipitation threshold for *S. psammophila* was 2.1 mm, 20 rainfall  
646 ~~events of 1–2 mm, which encompassed 21.3% of all rainfall events, did not produce stemflow,~~  
647 ~~but stemflow production under these water stress conditions was an extra benefit for *C.*~~  
648 ~~*korshinskii*. Although the total amount was limited, it was of significant importance for the~~  
649 ~~survival of the xerophytic shrubs, particularly during long intervals with no~~  
650 ~~rainfall~~ *psammophila* was 2.1 mm, 20 rainfall events of 1–2 mm, which encompassed 21.3% of  
651 ~~all rainfall events during the rainy season, did not produce stemflow, but stemflow yield during~~  
652 ~~rains 1–2 mm was an extra benefit for *C. korshinskii*. Although the total amount was limited,~~  
653 ~~the soil moisture replenishment and the resulting ecological responses were not negligible for~~

654 dryland shrubs and the peripheral arid environment (Li et al., 2009). A 2 mm summer rain  
655 might stimulate the activity of soil microbes, resulting in an increase of soil nitrate in the semi-  
656 arid Great Basin at western USA (Cui and Caldwell, 1997), and a brief decomposition pulse  
657 (Austin et al., 2004). The summer rains  $\geq 3$  mm are usually necessary to elevate rates of carbon  
658 fixation in some higher plants at Southern Utah of USA (Schwinning et al., 2003), or for  
659 biological crusts to have a net carbon gain at Eastern Utah of USA (Belnap et al., 2004). That  
660 benefited the formation and maintenance of the “resource island” at the arid and semi-arid  
661 regions (Reynolds et al., 1999). Therefore, a greater stemflow yield and higher stemflow  
662 efficiency at rain pulse and light rains, and a smaller precipitation threshold might entitle *C.*  
663 *korshinskii* with more available water at the root zone, because stemflow functioned as an  
664 important source of available moisture at dryland ecosystems (Dunkerley, 2000; Yang, 2010;  
665 Navar, 2011; Li, et al., 2013). That agreed with the findings of Dong and Zhang (2001) that *S.*  
666 *psammophila* belonged to the water-spending paradigm from the aspect of leaf water relations  
667 and anatomic features, and the finding of Ai et al. (2015) that *C. korshinskii* belonged to the  
668 water-saving paradigm and had larger drought tolerance ability than *S. psammophila* from the  
669 aspect of root anatomical structure and hydraulic traits.

670 ~~In addition to the meteorological characteristics, the canopy structure and branch~~  
671 ~~architecture partly explained the inter-specific differences in the precipitation threshold~~  
672 ~~(Crockford and Richardson, 2000; Levia and Frost, 2003). A large, tall canopy created a large~~  
673 ~~rainfall interception area, also known as “canopy exposure” (Iida et al. 2011), particularly~~  
674 ~~during windy conditions (Van Stan et al, 2011). However, this advantage in stemflow~~  
675 ~~production might be offset by more consumption for wetting canopy and evaporation before~~  
676 ~~stemflow is generated in arid and semiarid regions, in which considerable evapotranspiration~~  
677 ~~potentially occurs. This phenomenon might be responsible for the smaller precipitation~~  
678 ~~threshold for stemflow production in *C. korshinskii*, which had a canopy height of  $2.1 \pm 0.2$  m~~

679 and a canopy area of  $5.14 \pm 0.26 \text{ m}^2$ , than *S. psammophila*, which had a canopy height of  $3.5$   
680  $\pm 0.2 \text{ m}$  and a canopy area of  $21.35 \pm 5.21 \text{ m}^2$ . Additionally, the canopy structure and branch  
681 architecture also affected the water holding capacity (Herwitz, 1985), the interception loss  
682 (Dunkerley, 2000), and consequently the precipitation threshold for stemflow generation  
683 (Staelens et al., 2008). Nevertheless, the most influential plant traits had not determined yet,  
684 and further stemflow studies was required at the finer leaf scale and temporal scale in the future  
685 (Levia and Germer, 2015).

686

#### 687 **4.3 Secure stemflow production advantage via beneficial leaf traits**

688 Further

#### 689 **4.3 Effects of leaf traits on stemflow yield**

690 Recent studies at the leaf scale indicated that leaf traits had a significant influence on  
691 stemflow (Návar and Bryan, 1990; Carlyle-Mose, 2004; Garcia-Estringana et al., 2010). At the  
692 individual shrub scale, the canopy gap, as represented by the LAI and the leaf mass, provided  
693 direct access for raindrops to the branch surface (Crockford and Richardson, 2000). The  
694 positive effects of LAI (Liang et al., 2009) and leaf biomass (Yuan et al., 2016) have already  
695 been confirmed for *Stewartia monadelphica* and *S. psammophila*, respectively. In a study of  
696 European beech saplings, Levia et al. (2015) assumed that a threshold number of leaves might  
697 exist for stemflow production. The positive effects could become negative if too many leaves  
698 enclose the branches, which would benefit throughfall instead. In general, The factors, such as  
699 a relatively large number of leaves (Levia et al., 2015; Li and Xiao, et al., 2016), a large leaf  
700 area (Li et al., 2015), a high LAI (Liang et al., 2009), a big leaf biomass (Yuan et al., 2016), a  
701 scale-like leaf arrangement (Owens et al., 2006), a small individual leaf area (Sellin et al.,  
702 2012), a concave leaf shape (Xu et al., 2005), a densely veined leaf structure, (Xu et al., 2005),  
703 an upward leaf orientation (Crockford and Richardson, 2000), leaf pubescence (Garcia-



704 Estringana et al., 2010), and the leaf epidermis microrelief (e.g., the non-hydrophobic leaf  
705 surface and the grooves within it) (Roth-Nebelsick et al., 2012)), together result in the retention  
706 of a large amount of precipitation in the canopy, supplying water for stemflow ~~productionyield~~,  
707 and providing a beneficial morphology that enables the leaves to function as a highly efficient  
708 natural water collecting and channelling system.

709 According to the [documenting at Flora of China and the](#) field observations in this study,  
710 [\(Chao and Gong, et al., 1999; Liu et al., 2010\)](#), *C. korshinskii* had ~~betterbeneficial~~ leaf  
711 morphology for stemflow ~~productionyield~~ than did *S. psammophila*, owing to a lanceolate and  
712 concaved leaf shape, a pinnate compound leaf arrangement and a densely sericeous pressed  
713 pubescence (Fig. [26](#)). Additionally, experimental measurements indicated that *C. korshinskii*  
714 had a larger MTA, LAB, LNB and ~~SLWLAI~~ (an average of 54.4 °, 2509.051 cm<sup>2</sup>, 12479 and  
715 ~~126.04 g cm<sup>-2</sup> 4~~, respectively) and a smaller ILAB (an average of 21.949 mm<sup>2</sup>) than did *S.*  
716 *psammophila* (an average of 48.5 °, 1797.939 cm<sup>2</sup>, 2404, ~~73.87 g cm<sup>-2</sup> 1.7~~ and 87.525 mm<sup>2</sup>,  
717 respectively). ~~The larger SLW indicated that more biomass was deposited per unit leaf area.~~  
718 The concave leaf shape, upward leaf orientation (MTA) and densely veined leaf structure  
719 (ILAB) (Xu et al., 2005) provided stronger leaf structural support in *C. korshinskii* for the  
720 interception and transportation of precipitation, particularly during highly intense rains.  
721 Therefore, in addition to the leaf morphology, *C. korshinskii* was also equipped with more  
722 beneficial leaf structural ~~characteristicsfeatures~~ for stemflow ~~productionyield~~.

723  
724 [Fig. 6. Comparison of leaf morphologies of \*C. korshinskii\* and \*S. psammophila\*.](#)  
725

726 ~~However, given that BML had strong effects on stemflow in *S. psammophila* (Yuan et al.,~~  
727 ~~2016), why were stem traits identified as the single most influential traits for stemflow~~  
728 ~~production in *C. korshinskii*, as indicated by the BMS in this study? The answer may partly lie~~  
729 ~~in the values of HV and PBMS. HV was computed as the cross-sectional area of the xylem~~

730 divided by the total leaf area supported by the stems (Sellin et al., 2012). A higher HV indicates  
731 a potentially better water supply to leaves in terms of hydraulic conductance. However, it could  
732 also be interpreted as indicating that more stem tissues are required to support the unit leaf area  
733 for the normal function of the individual branch. The average HV of *C. korshinskii* was 0.0507  
734 and increased from 0.0438 for the 5–10 mm branches to 0.0615 for the >18 mm branches and  
735 was an order of magnitude higher than in *S. psammophila*, which averaged 0.0009 and  
736 remained nearly the same for different BD categories. The optimal partitioning theory indicates  
737 that plants preferentially allocate biomass into the organs that harvest the most limiting  
738 resource (Thornley, 1972; Bloom et al., 1985) and finally reach the “functional equilibrium”  
739 of biomass allocation (Brouwer, 1963; Iwasa and Roughgarden, 1984). Therefore, a greater  
740 stem biomass might be required by *C. korshinskii* to support leaf development than in *S.*  
741 *psammophila*, thus allowing more carbohydrate produced and raindrops intercepted at the  
742 canopy. This possibility is consistent with the biomass allocation patterns and leaf areas of the  
743 shrub species in this study. *C. korshinskii* allocated more biomass into the stems with an  
744 average of PBMS of 85.6% and had a larger leaf area with an average of LAB of 2509.1 cm<sup>2</sup>  
745 than *S. psammophila*, which had an average PBMS and LAB of 81.9% and 1797.9 cm<sup>2</sup>,  
746 respectively. The larger values of PBMS and LAB in *C. korshinskii* were observed for all BD  
747 categories (Table 1). Additionally, the larger PBMS helped to prevent the intercepted rain drops  
748 from falling off under windy conditions, which also benefited stemflow production in *C.*  
749 *korshinskii*.

750 A controlled experiment was conducted for the foliated and manually defoliated *C.*  
751 *korshinskii* and *S. psammophila* simultaneously at the 2015 rainy season. Compared with the  
752 previous studies comparing stemflow yield between the leafed period (summer and growing  
753 season) and the leafless period (winter and dormant season) (Dolman, 1987; Masukata et al.,  
754 1990; Neal et al., 1993; Martinez-Meza and Whitford, 1996; Deguchi et al., 2006; Liang et al.,

2009; Muzylo et al., 2012), we improved this method and guaranteed the identical meteorological conditions and stand conditions, which was believed to provide more convincing evidence for leaf's effect on stemflow yield.

However, contradictory results was reached in this study.  $SF_b$  of the foliated *C. korshinskii* was 2.5-fold larger than did the defoliated *C. korshinskii* on average (Table 3), which seemed to demonstrate an overall positive effects of leaves affecting stemflow yield. But, it contradicted with the average 1.3-fold larger  $SF_b$  of the defoliated *S. psammophila* than did the foliated *S. psammophila*. Despite of the identical stand and meteorological conditions, the changing interception area for raindrops was not taken into account as did the previous studies, which was mainly represented by leaf area and stem surface area at the foliated and defoliated state, respectively. For comparing the inter-specific  $SF_b$ , the normalized area indexes of SSAL and SSAS was analysed in this study. At the foliated state, a 1.4-fold larger SSAL of the *C. korshinskii* was corresponded to a 1.6-fold larger  $SF_b$  than that of *S. psammophila*, respectively. But at the defoliated state, a 2.0-fold larger SSAS of *S. psammophila* corresponded to a 1.8-fold larger  $SF_b$  than that of *C. korshinskii*, respectively (Table 1 and Table 3). Indeed, it greatly underestimated the real stem surface area of individual branches by ignoring the collateral stems and computing SA with the surface area of the main stem, which was assumed as a standard cone. However, the positive relations of  $SF_b$  with SSAL and SSAS at different leaf states might shed light on the long-standing discussion about leaf's effects on stemflow. Although an identical meteorological and stand conditions and similar plant traits were guaranteed, the experiment by comparing stemflow yield between the foliated and defoliated periods might provide no feasible evidence for leaf's effects (positive, negative or neglectable) affecting stemflow yield, if the newly exposed branch surface at the defoliated period and the resulting rainfall intercepting effect were not considered.

## 780 5 Conclusions

781 Compared with *S. psammophila*, *C. korshinskii* produced a larger amount of stemflow  
782 more efficiently during different-sized rains; an average 1.9, 1.3, 1.4, 1.6 and 2.5-fold  
783 increase larger in *C. korshinskii* was observed for the branch stemflow production volume ( $SF_b$ ),  
784 the shrub stemflow depth ( $SF_d$ ), the shrub stemflow percentage (SF%), the stemflow  
785 productivity (SFP) and the stemflow funnelling ratio (FR), respectively. The largest inter-  
786 specific differences in stemflow production yield ( $SF_b$ ,  $SF_d$  and SF%) and the  
787 production efficiency (SFP and FR) was were maximized for the 5–10 mm branches and during  
788 rains  $\leq 2$  mm, which were the most frequent rainfall events. Although the total amount of  
789 rainfall was limited, it was of great importance. The smaller threshold precipitation (0.9 mm  
790 for *C. korshinskii* to survive and thrive, particularly during vs. 2.1 mm for *S. psammophila*,  
791 and the beneficial leaf traits might be partly responsible for the extreme drought period.  
792 Additionally, the inter-specific differences in  $SF_b$ ,  $SF_d$ , SF% and SFP were maximized for the  
793 5–10 mm branches; this result was particularly significant because it encouraged young shoots  
794 by supplying more water superior stemflow yield and efficiency in *C. korshinskii*.

795 Beneficial leaf traits, including a lanceolate and concaved leaf shape, a pinnate compound  
796 leaf arrangement, a densely sericeous pressed pubescence, an upward leaf orientation (MTA),  
797 a large leaf area (LAB), a relatively large number of leaves (LNB), a large leaf area index (LAI),  
798 a small individual leaf area (ILAB), and a large specific leaf weight (SLW), might be  
799 responsible for the superior stemflow production in *C. korshinskii*. Along with the canopy  
800 structure, these leaf traits may account for the lower precipitation threshold to initiate stemflow  
801 in *C. korshinskii* (0.9 mm) than in *S. psammophila* (2.1 mm). A lower precipitation threshold  
802 enabled *C. korshinskii* to harvest more water from rainfall via stemflow.

803 In conclusion, a higher and more efficient stemflow, a lower precipitation threshold and  
804 beneficial leaf traits provided *C. korshinskii* with greater drought tolerance and a competitive

805 ~~edge in a water-stressed ecosystem.~~

806 Precipitation amount had the largest influence on both stemflow yield and efficiency for  
807 the two shrub species. BA was the most influential plant trait on FR. For  $SF_b$ , stem biomass  
808 and leaf biomass were the most influential plant traits in *C. korshinskii* and *S. psammophila*,  
809 respectively. But for SFP, leaf traits (the individual leaf area) and branch traits (branch size and  
810 biomass allocation pattern) had a larger influence in these two shrub species during smaller  
811 rains  $\leq 10$  mm and heavier rains  $> 15$  mm, respectively.

812 By comparing  $SF_b$  between the foliated and manually defoliated shrubs simultaneously at  
813 the 2015 rainy season, a contradiction was noted: the larger stemflow yield of *C. korshinskii* at  
814 the foliated state, but the larger stemflow yield of *S. psammophila* at the defoliated state. That  
815 corresponded to the inter-specific difference of the specific surface area representing by leaves  
816 (SSAL) and stems (SSAS) at different leaf states, respectively. It shed lights on the feasibility  
817 of experiments by comparing stemflow yield between the foliated and defoliated periods,  
818 which might provide no convincing evidence for leaf's effects (positive, negative or  
819 neglectable) affecting stemflow yield, if the newly exposed branch surface at the defoliated  
820 period and the resulting rainfall intercepting effects were not considered.

821

822 *Acknowledgments.* This research was funded in part by the National Natural Science  
823 Foundation of China (No. 41390462), the National Key Research and Development Program  
824 (No. 2016YFC0501602) and the Youth Innovation Promotion Association CAS (No. 2016040).  
825 We are grateful to Mengyu Wang, Dongyang Zhao, Meixia Mi and Hongmin Hao for field  
826 assistant. Special thanks were given to the Shenmu Erosion and Environment Research Station  
827 for experiment support to this research. We thank Prof. David Dunkerley and another  
828 anonymous reviewer for their comments which greatly improve the quality of this manuscript.

829

830 **References**

831 Ai, S. S., Li, Y. Y., Chen, J. C., and Chen, W. Y.: Root anatomical structure and hydraulic traits  
832 of three typical shrubs on the sandy lands of northern Shaanxi Province, China, Chinese J.  
833 Appl. Ecol., 26, 3277–3284, 2015 (in Chinese with English abstract).

834 [Allaby, M.: A Dictionary of Ecology. 4 ed. Oxford University Press, 2010.](#)

835 André F., Jonard, M., and Ponette, Q.: Influence of species and rain event characteristics on  
836 stemflow volume in a temperate mixed oak-beech stand, Hydrol. Process., 22, 4455–4466,  
837 2008.

838 [Andersson, T.: Influence of stemflow and throughfall from common oak \(\*Quercus robur\*\) on  
839 soil chemistry and vegetation patterns, Can. J. Forest Res., 21, 917–924, 1991.](#)

840 [Austin, A. T., Yahdjian, L., Stark, J. M., Belnap, J., Porporato, A., Norton, U., Ravetta, D. A.  
841 and Schaeffer, S. M.: Water pulses and biogeochemical cycles in arid and semiarid  
842 ecosystems, Oecologia, 141, 221–235, 2004.](#)

843 Belmonte Serrato, F., and Romero Diaz, A.: A simple technique for measuring rainfall  
844 interception by small shrub: “interception flow collection box”, Hydrol. Process., 12, 471–  
845 481, 1998.

846 [Bloom, A. J., Chapin, F. S., and Mooney, H. A.: Resource limitation in plants: An economic  
847 analogy, Annu. Rev. Ecol. Syst., 16, 363–392, 1985.](#)

848 [Brouwer, R.: Some aspects of the equilibrium between overground and underground plant parts,  
849 Meded. Inst. Biol. Scheikd. Onderzoek Landbouwgewassen, 31–39, 1963.](#)

850 [Belnap, J., Philips, S. L. and Miller, M. E.: Response of desert biological soil crusts to  
851 alterations in precipitation frequency, Oecologia, 141, 306–316, 2004.](#)

852 [Brady, D. J., Wenzel, C. L., Fillery, I. R. P. and Gregory, P. J.: Root growth and nitrate uptake  
853 by wheat \(\*Triticum aestivum\* L.\) following wetting of dry surface soil, J. Exp. Bot., 46, 557–  
854 564, 1995.](#)

855 Carlyle-Moses, D. E.: Throughfall, stemflow, and canopy interception loss fluxes in a semi-  
856 arid Sierra Madre Oriental matorral community, *J. Arid Environ.*, 58, 181–202, 2004.

857 Carlyle-Moses, D. E., and Price, A. G.: Growing-season stemflow production within a  
858 deciduous forest of southern Ontario, *Hydrol. Process.*, 20, 3651–3663, 2006.

859 Carlyle-Moses, D. E., and Schooling, J.: Tree traits and meteorological factors influencing the  
860 initiation and rate of stemflow from isolated deciduous trees, *Hydrol. Process.*, 29, 4083–  
861 4099, 2015.

862 Clements, J. R.: Stemflow in a Multi-storied Aspen Community, *Can. J. Forest. Res.*, 160–165,  
863 1972.

864 Chao P. N., and Gong G.T.: *Salix (Salicaceae)*, in: *Flora of China*, edited by Wu Z. Y., Raven  
865 P. H. and Hong D. Y., Science Press, Beijing and Missouri Botanical Garden Press, St. Louis,  
866 4, 162–274, 1999.

867 Crockford, R. H., and Richardson, D. P.: Partitioning of rainfall into throughfall, stemflow and  
868 interception: effect of forest type, ground cover and climate, *Hydrol. Process.*, 14, 2903–  
869 2920, 2000.

870 [Cui, M. Y. and Caldwell, M. M.: A large ephemeral release of nitrogen upon wetting of dry soil](#)  
871 [and corresponding root responses in the field, \*Plant Soil\*, 291–299, 1997.](#)

872 [Deguchi, A., Hattori, S. and Park, H. T.: The influence of seasonal changes in canopy structure](#)  
873 [on interception loss: Application of the revised Gash model, \*J. Hydrol.\*, 318, 80–102, 2006.](#)

874 [Devitt, D. H., and Smith, S. D.: Root channel macropores enhance downward movement of](#)  
875 [water in a Mojave Desert ecosystem, \*J. Arid Environ.\*, 50, 1, 99–108, 2002.](#)

876 Dolman, A. J.: Summer and winter rainfall interception in an oak forest. Predictions with an  
877 analytical and a numerical simulation model, *J. Hydrol.*, 90, 1–9, 1987.

878 [Dong, S. R., Guo, J. T. and Man, R. Z.: The throughfall, stemflow and interception loss of the](#)  
879 [Pinus tabuliformis plantations at northern China, \*J. Beijing Forestry Univ.\*, 9, 58–68, 1987](#)

880 [\(in Chinese\).](#)

881 [Dong, X. J. and Zhang, X. S.: Some observations of the adaptations of sandy shrubs to the arid](#)

882 [environment in the Mu Us Sandland: leaf water relations and anatomic features, J. Arid](#)

883 [Environ., 48, 41–48, 2001.](#)

884 Dunkerley, D.: Measuring interception loss and canopy storage in dryland vegetation: a brief

885 review and evaluation of available research strategies, *Hydrol. Process.*, 14, 669–678, 2000.

886 Dunkerley, D.: Stemflow production and intrastorm rainfall intensity variation: an

887 experimental analysis using laboratory rainfall simulation, *Earth Surf. Proc. Land*, 39, 1741–

888 1752, 2014a.

889 Dunkerley, D.: Stemflow on the woody parts of plants: dependence on rainfall intensity and

890 event profile from laboratory simulations, *Hydrol. Process.*, 28, 5469–5482, 2014b.

891 [Firn, R.: Plant Intelligence: an Alternative Point of View. \*Annals of Botany\*, 93, 4, 345–351,](#)

892 [2004.](#)

893 Garcia-Estringana, P., Alonso-Blazquez, N., and Alegre, J.: Water storage capacity, stemflow

894 and water funneling in Mediterranean shrubs, *J. Hydrol.*, 389, 363–372, 2010.

895 Giacomini, A., and Trucchi, P.: Rainfall interception in a beech coppice (Acquerino, Italy), *J.*

896 *Hydrol.*, 137, 141–147, 1992.

897 Groisman, P. Y., and Legates, D. R.: The accuracy of United States precipitation data, *B. Am.*

898 *Meteorol. Soc.*, 75, 215–227, 1994.

899 ~~Herwitz, S. R.: [Interception storage capacities of tropical rainforest canopy trees, \*J. Hydrol.\*,](#)~~

900 ~~[77, 237–252, 1985.](#)~~

901 ~~[Herwitz, S. R.:](#)~~ Infiltration-excess caused by Stemflow in a cyclone-prone tropical rainforest,

902 *Earth Surf. Proc. Land*, 11, 401–412, 1986.

903 Herwitz, S. R.: Rainfall totals in relation to solute inputs along an exceptionally wet altitudinal

904 transect, *Catena*, 14, 25–30, 1987.



- 905 Honda, E. A., Mendonça, A. H., and Durigan, G.: Factors affecting the stemflow of trees in the  
906 Brazilian cerrado, *Ecohydrology*, 8, 1351–1362, 2015.
- 907 ~~Hida, S. I., Shimizu, T., Kabeya, N., Nobuhiro, T., Tamai, K., Shimizu, A., Ito, E.,~~  
908 ~~Ohnuki,~~ Jackson, R. B. and Caldwell, M. M.: Kinetic responses of *Pseudoroegneria* roots to  
909 localized soil enrichment. *Plant Soil*, 138, 231–238, 1991.
- 910 Jasper, D. A., Abbott, L. K. and Robson, A. D.: The survival of infective hyphae of vesicular–  
911 arbuscular mycorrhizal fungi in dry soil: an interaction with sporulation, *New Phytol.*, 124,  
912 473–479, 1993.
- 913 ~~Y., Abe, T., Tsuboyama, Y., Chann, S., and Keth, N.:~~ Calibration of tipping bucket flow meters  
914 and rain gauges to measure gross rainfall, throughfall, and stemflow applied to data from a  
915 Japanese temperate coniferous forest and a Cambodian tropical deciduous forest, *Hydrol.*  
916 *Process.*, 26, 2445–2454, 2012.
- 917 ~~Iwasa, Y., and Roughgarden, J.:~~ Shoot/root balance of plants: Optimal growth of a system with  
918 many vegetative organs, *Theor. Popul. Biol.*, 25, 78–105, 1984.
- 919 Jia, X. X., Shao, M. A., Wei, X. R., Horton, R., and Li, X. Z.: Estimating total net primary  
920 productivity of managed grasslands by a state-space modeling approach in a small  
921 catchment on the Loess Plateau, China, *Geoderma*, 160, 281–291, 2011.
- 922 Jia, X. X., Shao, M. A., Wei, X. R., and Wang, Y. Q.: Hillslope scale temporal stability of soil  
923 water storage in diverse soil layers, *J. Hydrol.*, 498, 254–264, 2013.
- 924 Jian, S. Q., Zhao, C. Y., Fang, S. M., and Kai, Y. U.: Characteristics of *Caragana korshinskii*  
925 and *Hippophae rhamnoides* stemflow and their significance in soil moisture enhancement  
926 in Loess Plateau, China, *J. Arid Land.*, 6, 105–116, 2014.
- 927 Johnson, M. S., and Lehmann, J.: Double-funneling of trees: Stemflow and root-induced  
928 preferential flow, *Ecoscience*, 13, 324–333, 2006.
- 929 Jonard, M., Andre, F., and Ponette, Q.: Modeling leaf dispersal in mixed hardwood forests

930 using a ballistic approach, *Ecology*, 87, 2306–2318, 2006.

931 Levia, D. F., and Frost, E. E.: A review and evaluation of stemflow literature in the hydrologic  
932 and biogeochemical cycles of forested and agricultural ecosystems, *J. Hydrol.*, 274, 1–29,  
933 2003.

934 Levia, D. F., and Herwitz, S. R.: Interspecific variation of bark water storage capacity of three  
935 deciduous tree species in relation to stemflow yield and solute flux to forest soils, *Catena*,  
936 64, 117–137, 2005.

937 ~~Levia, D. F., and Germer, S.: A review of stemflow generation dynamics and stemflow~~  
938 ~~environment interactions in forests and shrublands, *Rev. Geophys.*, 53, 673–714, 2015.~~

939 ~~Levia, D. F.,~~ Michalzik, B., Nähe, K., Bischoff, S., Richter, S., and Legates, D. R.: Differential  
940 stemflow yield from European beech saplings: the role of individual canopy structure  
941 metrics, *Hydrol. Process.*, 29, 43–51, 2015.

942 ~~Levia, D. F., and Underwood, S. J.: Snowmelt induced stemflow in northern hardwood forests:~~  
943 ~~a theoretical explanation on the causation of a neglected hydrological process, *Adv. Water*~~  
944 ~~*Resour.*, 27, 121–128, 2004.~~

945 Li, L., Li, X. Y., Zhang, S. Y., Jiang, Z. Y., Zheng, X. R., Hu, X., and Huang, Y. M.: Stemflow  
946 and its controlling factors in the subshrub *Artemisia ordosica* during two contrasting growth  
947 stages in the Mu Us sandy land of northern China, *Hydrol. Res.*, 47, 409–418, 2015.

948 ~~Li, X. Y., Yang, Z. P., Li, Y. T., and Lin, H.: Connecting ecohydrology and hydrogeology in~~  
949 ~~desert shrubs: stemflow as a source of preferential flow in soils, *Hydrol. Earth Syst. Sci.*, 13,~~  
950 ~~1133–1144, 2009.~~

951 ~~Li, X.,~~ Xiao, Q., Niu, J., Dymond, S., van Doorn, N. S., Yu, X., Xie, B., Lv, X., Zhang, K., and  
952 Li, J.: Process-based rainfall interception by small trees in Northern China: The effect of  
953 rainfall traits and crown structure characteristics, *Agr. Forest Meteorol.*, 218–219, 65–73,  
954 2016.

955 Li, X. Y.: [Hydrology and Biogeochemistry of Semiarid and Arid Regions](#), in: [Forest Hydrology](#)  
956 [and Biogeochemistry](#), edited by: [Levia, D. F., Carlyle-Moses, D. and Tanaka, T.](#), Springer,  
957 [Netherlands, 13, 285–299, 2011.](#)

958 [Li, X. Y., Hu, X., Zhang, Z. H., Peng, H. Y., Zhang, S. Y., Li, G. Y., Li, L. and Ma, Y. J.: Shrub](#)  
959 [hydropedology: preferential water availability to deep soil layer](#), [Vadose Zone J.](#), **12**, 2013.

960 [Li, X. Y.](#), Liu, L. Y., Gao, S. Y., Ma, Y. J., and Yang, Z. P.: Stemflow in three shrubs and its  
961 effect on soil water enhancement in semiarid loess region of China, [Agr. Forest Meteorol.](#),  
962 **148**, 1501–1507, 2008.

963 [Li, X. Y., Yang, Z. P., Li, Y. T., and Lin, H.: Connecting ecohydrology and hydropedology in](#)  
964 [desert shrubs: stemflow as a source of preferential flow in soils](#), [Hydrol. Earth Syst. Sci.](#), **13**,  
965 [1133–1144, 2009.](#)

966 Liang, W., L., Kosugi, K. I., and Mizuyama, T.: Characteristics of stemflow for tall *Stewartia*  
967 (*Stewartia monadelphica*) growing on a hillslope, [J. Hydrol.](#), **378**, 168–178, 2009.

968 Liu Y. X., Chang Z. Y. and Gennady. P. Y.: *Caragana (Fabaceae)*, in: [Flora of China](#), edited  
969 by: [Wu Z. Y., Raven P. H. and Hong D. Y.](#), Science Press, Beijing and Missouri Botanical  
970 Garden Press, St. Louis, **10**, 528–545, 2010.

971 Llorens, P., and Domingo, F.: Rainfall partitioning by vegetation under Mediterranean  
972 conditions. A review of studies in Europe, [J. Hydrol.](#), **335**, 37–54, 2007.

973 Ma, C. C., Gao, Y. B., Guo, H. Y., Wang, J. L., Wu, J. B., and Xu, J. S.: Physiological  
974 adaptations of four dominant *Caragana* species in the desert region of the Inner Mongolia  
975 Plateau, [J. Arid Environ.](#), **72**, 247–254, 2008.

976 Ma, C. C., Gao, Y. B., Wang, J. L., and Guo, H. Y.: Ecological adaptation of *Caragana opulens*  
977 on the Inner Mongolia Plateau: photosynthesis and water metabolism, [Chinese J. Plant Ecol.](#),  
978 **28**, 305–312 , 2004 (in Chinese with English abstract).

979 Martinez-Meza, E., and Whitford, W. G.: Stemflow, throughfall and channelization of

980 stemflow by roots in three Chihuahuan desert shrubs, *J. Arid Environ.*, 32, 271–287, 1996.

981 Mauchamp, A., and Janeau, J. L.: Water funnelling by the crown of *Flourensia cernua*, a  
982 Chihuahuan Desert shrub, *J. Arid Environ.*, 25, 299–306, 1993.

983 [Masukata, H., Ando, M. and Ogawa, H.: Throughfall, stemflow and interception of rainwater](#)  
984 [in an evergreen broadleaved forest, \*Ecol. Res.\*, 5, 303–316, 1990.](#)

985 McClain, M. E., Boyer, E. W., Dent, C. L., Gergel, S. E., Grimm, N. B., Groffman, P. M., Hart,  
986 S. C., Harvey, J. W., Johnston, C. A., and Mayorga, E.: Biogeochemical Hot Spots and Hot  
987 Moments at the Interface of Terrestrial and Aquatic Ecosystems, *Ecosystems*, 6, 301–312,  
988 2003.

989 Murakami, S.: Abrupt changes in annual stemflow with growth in a young stand of Japanese  
990 cypress, *Hydrol. Res. Lett.*, 3, 32–35, 2009.

991 Muzyło, A., Llorens, P., and Domingo, F.: Rainfall partitioning in a deciduous forest plot in  
992 leafed and leafless periods, *Ecohydrology*, 5, 759–767, 2012.

993 [Návar, J.: Stemflow variation in Mexico's northeastern forest communities: Its contribution to](#)  
994 [soil moisture content and aquifer recharge, \*J. Hydrol.\*, 408, 35–42, 2011.](#)

995 [Návar, J.](#), and Bryan, R.: Interception loss and rainfall redistribution by three semi-arid growing  
996 shrubs in northeastern Mexico, *J. Hydrol.*, 115, 51–63, 1990.

997 Neal, C., Robson, A. J., Bhardwaj, C. L., Conway, T., Jeffery, H. A., Neal, M., Ryland, G. P.,  
998 Smith, C. J., and Walls, J.: Relationships between precipitation, stemflow and throughfall  
999 for a lowland beech plantation, Black Wood, Hampshire, southern England: findings on  
1000 interception at a forest edge and the effects of storm damage, *J. Hydrol.*, 146, 221–233, 1993.

1001 O'Brien, R. M.: A Caution Regarding Rules of Thumb for Variance Inflation Factors, *Qual.*  
1002 *Quant.*, 41, 673–690, 2007.

1003 Owens, M. K., Lyons, R. K., and Alejandro, C. L.: Rainfall partitioning within semiarid juniper  
1004 communities: effects of event size and canopy cover, *Hydrol. Process.*, 20, 3179–3189, 2006.

1005 Pressland, A.: Rainfall partitioning by an arid woodland (*Acacia aneura* F. Muell.) in south-  
1006 western Queensland, Aust. J. Bot., 21, 235–245, 1973.

1007 Pypker, T. G., Levia, D. F., Staelens, J., and Van Stan II, J. T.: Canopy structure in relation to  
1008 hydrological and biogeochemical fluxes, in: Forest Hydrology and Biogeochemistry, edited  
1009 by: Springer, 371–388, 2011.

1010 Rango, A., Tartowski, S. L., Laliberte, A., Wainwright, J., and Parsons, A.: Islands of  
1011 hydrologically enhanced biotic productivity in natural and managed arid ecosystems, J. Arid  
1012 Environ., 65, 235–252, 2006.

1013 Reynolds, J. F., Virginia, R. A., Kemp, P. R., de Soyza, A. G., and Tremmel, D. C.: Impact of  
1014 drought on desert shrubs: effects of seasonality and degree of resource island development,  
1015 Ecol. Monogr., 69, 69–106, 1999.

1016 Roth-Nebelsick, A., Ebner, M., Miranda, T., Gottschalk, V., Voigt, D., Gorb, S., Stegmaier, T.,  
1017 Sarsour, J., Linke, M., and Konrad, W.: Leaf surface structures enable the endemic Namib  
1018 desert grass *Stipagrostis sabulicola* to irrigate itself with fog water, J. R. Soc. Interface., 9,  
1019 1965–1974, 2012.

1020 [Schwinning, S. and Sala, O. E.: Hierarchy of responses to resource pulses in and semi-arid](#)  
1021 [ecosystems, Oecologia, 141, 211–220, 2004.](#)

1022 [Schwinning, S., Starr, B. and Ehleringer, J. R.: Dominant cold desert plants do not partition](#)  
1023 [warm season precipitation by event size, Oecologia, 136, 250–260, 2003.](#)

1024 Sellin, A., Öunapuu, E., Kaurilind, E., and Alber, M.: Size-dependent variability of leaf and  
1025 shoot hydraulic conductance in silver birch, Trees, 26, 821–831, 2012.

1026 Siegert, C. M., and Levia, D. F.: Seasonal and meteorological effects on differential stemflow  
1027 funneling ratios for two deciduous tree species, J. Hydrol., 519, Part A, 446–454, 2014.

1028 Siles, P., Harmand, J.-M., and Vaast, P.: Effects of *Inga densiflora* on the microclimate of coffee  
1029 (*Coffea arabica* L.) and overall biomass under optimal growing conditions in Costa Rica,

- 1030 Agroforest Syst., 78, 269–286, 2010a.
- 1031 Siles, P., Vaast, P., Dreyer, E., and Harmand, J.-M.: Rainfall partitioning into throughfall,  
1032 stemflow and interception loss in a coffee (*Coffea arabica* L.) monoculture compared to an  
1033 agroforestry system with *Inga densiflora*, J. Hydrol., 395, 39–48, 2010b.
- 1034 ~~Staelens, J., Houle, D., De Schrijver, A., Neiryneck, J., and Verheyen, K.: Calculating dry~~  
1035 ~~deposition and canopy exchange with the canopy budget model: Review of assumptions and~~  
1036 ~~application to two deciduous forests, Water Air Soil Poll., 191, 149–169, 2008.~~
- 1037 ~~Sponseller, R. A.: Precipitation pulses and soil CO<sub>2</sub> flux in a Sonoran Desert ecosystem, Global~~  
1038 ~~Change Biol., 13, 426–436, 2007.~~
- 1039 Stephenson, N. L., Das, A. J., Condit, R., Russo, S. E., Baker, P. J., Beckman, N. G., Coomes,  
1040 D. A., Lines, E. R., Morris, W. K., Ruger, N., Alvarez, E., Blundo, C., Bunyavejchewin, S.,  
1041 Chuyong, G., Davies, S. J., Duque, A., Ewango, C. N., Flores, O., Franklin, J. F., Grau, H.  
1042 R., Hao, Z., Harmon, M. E., Hubbell, S. P., Kenfack, D., Lin, Y., Makana, J. R., Malizia, A.,  
1043 Malizia, L. R., Pabst, R. J., Pongpattananurak, N., Su, S. H., Sun, I. F., Tan, S., Thomas, D.,  
1044 van Mantgem, P. J., Wang, X., Wiser, S. K., and Zavala, M. A.: Rate of tree carbon  
1045 accumulation increases continuously with tree size, Nature, 507, 90–93, 2014.
- 1046 ~~Thornley, J. H. M.: A Balanced Quantitative Model for Root: Shoot Ratios in Vegetative Plants,~~  
1047 ~~Ann. Bot London., 36, 431–441, 1972.~~
- 1048 ~~Van Stan II, J. T., Siegert, C. M., Levia Jr, D. F., and Scheick, C. E.: Effects of wind-driven~~  
1049 ~~rainfall on stemflow generation between codominant tree species with differing crown~~  
1050 ~~characteristics, Agr. Forest Meteorol., 151, 1277–1286, 2011.~~
- 1051 Van Stan II, J., Van Stan, J. H., and Levia Jr., D. F.: Meteorological influences on stemflow  
1052 generation across diameter size classes of two morphologically distinct deciduous species,  
1053 Int. J. Biometeorol., 58, 2059–2069, 2014.
- 1054 Wang, X. P., Zhang, Y. F., Wang, Z. N., Pan, Y. X., Hu, R., Li, X. J., and Zhang, H.: Influence

1055 of shrub canopy morphology and rainfall characteristics on stemflow within a revegetated  
1056 sand dune in the Tengger Desert, NW China, *Hydrol. Process.*, 27, 1501–1509, 2013.

1057 Wang, X. P., Wang, Z. N., Berndtsson, R., Zhang, Y. F., and Pan, Y. X.: Desert shrub stemflow  
1058 and its significance in soil moisture replenishment, *Hydrol. Earth Syst. Sci.*, 15, 561–567,  
1059 2011.

1060 Whitford, W. G., Anderson, J., and Rice, P. M.: Stemflow contribution to the ‘fertile island’  
1061 effect in creosotebush, *Larrea tridentata*, *J. Arid Environ.*, 35, 451–457, 1997.

1062 Xu, X., Wang, Q., and Hirata, E.: Precipitation partitioning and related nutrient fluxes in a  
1063 subtropical forest in Okinawa, Japan, *Ann. Forest Sci.*, 62, 245–252, 2005.

1064 Yang, Z., Li, X., Liu, L., Wu, J., Hasi, E., and Sun, Y.: Characteristics of stemflow for sand-  
1065 fixed shrubs in Mu Us sandy land, Northwest China, *Chin. Sci. Bull.*, 53, 2207–2214, 2008.

1066 Yang, Z. P.: Rainfall partitioning process and its effects on soil hydrological processes for sand-  
1067 fixed shrubs in Mu Us sandland, northwest China, D. Sc., Beijing Normal University, 2010.

1068 Yuan, C., Gao, G. Y., and Fu, B. J.: Stemflow of a xerophytic shrub (*Salix psammophila*) in  
1069 northern China: Implication for beneficial branch architecture to produce stemflow, *J.*  
1070 *Hydrol.*, 539, 577–588, 2016.

1071 Zhang, S. Y., Li, X. Y., Li, L., Huang, Y. M., Zhao, G. Q., and Chen, H. Y.: The measurement  
1072 and modelling of stemflow in an alpine *Myricaria squamosa* community, *Hydrol. Process.*,  
1073 29, 889–899, 2015.

1074 [Zhang, Z. S., Zhao, Y., Li, X. R., Huang, L., and Tan, H. J.: Gross rainfall amount and maximum](#)  
1075 [rainfall intensity in 60-minute influence on interception loss of shrubs: a 10-year observation](#)  
1076 [in the Tengger Desert. \*Sci. Rep.\*, 6, 26030, 2016.](#)

1077 Zhao, P. P., Shao, M. A., and Wang, T. J.: Spatial distributions of soil surface-layer saturated  
1078 hydraulic conductivity and controlling factors on dam farmlands, *Water Resour. Manag.*, 24,  
1079 2247–2266, 2010.

1080 Zhu, Y. [J.](#), and Shao, M. [A.](#): Variability and pattern of surface moisture on a small-scale  
1081 hillslope in Liudaogou catchment on the northern Loess Plateau of China, *Geoderma*, 147,  
1082 185–191, 2008.



1083 **Table captions**

1084

1085 **Table 1.** Comparison of leaf traits, branch morphology and biomass indicators of *C. korshinskii*  
1086 and *S. psammophila*.

1087

1088 **Table 2.** Comparison of stemflow ~~production yield~~ ( $SF_b$ ,  $SF_d$  and  $SF\%$ ) between the foliated *C.*  
1089 *korshinskii* and *S. psammophila*.

1090

1091 **Table 3.** Comparison of stemflow ~~productivity (SFP) between C.~~ yield ( $SF_b$ ) of the foliated and  
1092 manually defoliated *C. korshinskii* and *S. psammophila*.

1093

1094 **Table 4.** Comparison of stemflow productivity (SFP) between the ~~funneling~~ foliated *C.*  
1095 *korshinskii* and *S. psammophila*.

1096

1097 **Table 5.** Comparison of the funnelling ratio (FR) ~~for~~ between the foliated *C. korshinskii* and *S.*  
1098 *psammophila*.

**Table 1.** Comparison of leaf traits, branch morphology and biomass indicators of *C. korshinskii* and *S. psammophila*.

| Plant traits       |                                                     | <i>C. korshinskii</i> (categorized by BD, mm) |                             |                             |                           |                                    | <i>S. psammophila</i> (categorized by BD, mm) |                           |                           |                                  |                                     |
|--------------------|-----------------------------------------------------|-----------------------------------------------|-----------------------------|-----------------------------|---------------------------|------------------------------------|-----------------------------------------------|---------------------------|---------------------------|----------------------------------|-------------------------------------|
|                    |                                                     | 5–10                                          | 10–15                       | 15–18                       | >18                       | Avg. (BD)                          | 5–10                                          | 10–15                     | 15–18                     | >18                              | Avg. (BD)                           |
| Leaf traits        | LAB<br>_(cm <sup>2</sup> )                          | 1202.7                                        | 2394.5                      | 3791.2                      | 5195.2                    | 2509.1<br>±1355.3                  | 499.2                                         | 1317.7                    | 2515.2                    | 3533.6                           | 1797.9<br>±1118.0                   |
|                    | LNB                                                 | 4787                                          | 11326                       | 20071                       | 29802                     | 12479<br>±8409                     | 392                                           | 1456                      | 3478                      | 5551                             | 2404<br>±1922                       |
|                    | ILAB<br>_(mm <sup>2</sup> )                         | 25.4                                          | 21.3                        | 18.9                        | 17.5                      | 21.9<br>±3.0                       | 135.1                                         | 93.1                      | 72.6                      | 64.3                             | 93.1<br>±27.8                       |
|                    | SLW<br>(SSAL<br>(cm <sup>2</sup> g <sup>-1</sup> )) | <u>126.42</u><br><u>2.8</u>                   | <u>126.01</u><br><u>7.3</u> | <u>125.71</u><br><u>4.3</u> | <u>125.12</u><br><u>6</u> | <u>126.18.2±0</u><br><u>±0.3.5</u> | <u>95.618</u><br><u>4</u>                     | <u>74.513</u><br><u>6</u> | <u>63.010</u><br><u>8</u> | <u>58.18.6</u><br><u>58.18.6</u> | <u>73.9</u><br><u>±14.512.7±0.4</u> |
|                    | HVSSAS (cm <sup>2</sup> g <sup>-1</sup> )           | <u>0.0438</u>                                 | <u>0.0513</u>               | <u>0.0572</u>               | <u>0.0615</u>             | <u>2.5±0.0507</u>                  | <u>0.0010</u>                                 | <u>0.0009</u>             | <u>0.0009</u>             | <u>0.0009</u>                    | <u>5.1±0.0009</u>                   |
|                    | BD<br>_(mm)                                         | <u>3.4</u>                                    | <u>2.3</u>                  | <u>1.9</u>                  | <u>1.6</u>                | <u>±0.00641</u>                    | <u>10.4</u>                                   | <u>5.4</u>                | <u>3.3</u>                | <u>1.9</u>                       | <u>±0.00013</u>                     |
| Branch morphology  | BD<br>_(mm)                                         | 8.17                                          | 12.49                       | 16.61                       | 20.16                     | 12.48<br>±4.16                     | 7.91                                          | 12.48                     | 16.92                     | 19.76                            | 13.73<br>±4.36                      |
|                    | BL<br>_(cm)                                         | 137.9                                         | 160.3                       | 195.9                       | 200.7                     | 161.5<br>±35.0                     | 212.5                                         | 260.2                     | 290.4                     | 320.1                            | 267.3<br>±49.7                      |
|                    | BA<br>_(°)                                          | 63                                            | 56                          | 63                          | 64                        | 60<br>±18                          | 64                                            | 63                        | 51                        | 60                               | 60<br>±20                           |
|                    | SA (cm <sup>2</sup> )                               | <u>176.8</u>                                  | <u>314.1</u>                | <u>508.6</u>                | <u>630.7</u>              | <u>326.1±20.6</u>                  | <u>268.0</u>                                  | <u>514.1</u>              | <u>827.7</u>              | <u>1312.3</u>                    | <u>711.0±38.9</u>                   |
| Biomass indicators | BML<br>_(g)                                         | 13.9                                          | 19.0                        | 30.2                        | 41.4                      | 19.9<br>±10.8                      | 5.4                                           | 18.0                      | 40.0                      | 61.3                             | 27.9<br>±20.7                       |
|                    | BMS<br>_(g)                                         | 62.9                                          | 121.4                       | 236.4                       | 375.8                     | 141.1<br>±110.8                    | 23.0                                          | 81.4                      | 188.5                     | 295.5                            | 130.7<br>±101.4                     |
|                    | PBMS<br>_(%)                                        | 82.0                                          | 86.3                        | 88.7                        | 90.0                      | 85.6<br>±3.1                       | 80.8                                          | 81.8                      | 82.5                      | 82.8                             | 81.9<br>±0.8                        |

1100  
1101  
1102  
1103

Note: LAB and LNB are leaf area and number of branch, respectively. ILAB is individual leaf area of branch. ~~SLW is~~ SSAL and SSAS are the specific ~~leaf weight,~~ and HV was the Huber value, ~~surface area representing with LAB and SA, respectively.~~ BD, BL and BA are average branch basal diameter, length and angle, respectively. SA is the surface area of stems. BML and BMS are biomass of leaves and stems, respectively. PBMS is the percentage of leafstem biomass to that of branch. The average values mentioned above are expressed as the means  $\pm$  SE.

**Table 2.** Comparison of stemflow productionyield ( $SF_b$ ,  $SF_d$  and  $SF\%$ ) between the foliated *C. korshinskii* and *S. psammophila*.

| Intra- and inter-specific differences                                                             | Stemflow indicators | BD categories (mm) | Precipitation categories (mm) |       |       |       |        |        | Avg.(P) |
|---------------------------------------------------------------------------------------------------|---------------------|--------------------|-------------------------------|-------|-------|-------|--------|--------|---------|
|                                                                                                   |                     |                    | ≤2                            | 2–5   | 5–10  | 10–15 | 15–20  | >20    |         |
| Intra-specific differences in <i>C. korshinskii</i> (CK)                                          | $SF_b$ (mL)         | 5–10               | 10.7                          | 29.8  | 73.5  | 109.9 | 227.6  | 306.1  | 119.0   |
|                                                                                                   |                     | 10–15              | 26.0                          | 64.0  | 166.1 | 236.0 | 478.6  | 689.7  | 262.4   |
|                                                                                                   |                     | 15–18              | 44.3                          | 103.3 | 279.9 | 416.6 | 826.0  | 1272.3 | 464.5   |
|                                                                                                   |                     | >18                | 69.5                          | 145.4 | 424.4 | 631.4 | 1226.9 | 1811.7 | 679.9   |
|                                                                                                   |                     | Avg.(BD)           | 28.4                          | 67.3  | 180.6 | 264.6 | 529.2  | 771.4  | 290.6   |
|                                                                                                   | $SF_d$ (mm)         | N/A                | 0.091                         | 0.242 | 0.636 | 0.919 | 1.859  | 2.646  | 1.000   |
| $SF\%$ (%)                                                                                        | N/A                 | 5.8                | 6.6                           | 8.8   | 7.5   | 10.1  | 8.9    | 8.0    |         |
| Intra-specific differences in <i>S. psammophila</i> (SP)                                          | $SF_b$ (mL)         | 5–10               | 2.8                           | 8.9   | 28.8  | 47.2  | 66.5   | 120.0  | 43.0    |
|                                                                                                   |                     | 10–15              | 7.6                           | 23.2  | 76.6  | 134.6 | 188.3  | 353.5  | 121.8   |
|                                                                                                   |                     | 15–18              | 12.0                          | 35.9  | 121.6 | 223.4 | 319.4  | 592.6  | 201.5   |
|                                                                                                   |                     | >18                | 16.2                          | 52.3  | 165.5 | 289.2 | 439.6  | 860.4  | 281.8   |
|                                                                                                   |                     | Avg.(BD)           | 9.0                           | 28.0  | 91.6  | 162.2 | 234.8  | 444.3  | 150.3   |
|                                                                                                   | $SF_d$ (mm)         | N/A                | ≤0.041                        | 0.411 | 0.485 | 0.899 | 1.273  | 2.232  | 0.788   |
| $SF\%$ (%)                                                                                        | N/A                 | 0.7                | 3.0                           | 6.1   | 6.8   | 7.2   | 7.9    | 5.5    |         |
| Inter-specific differences (the ratio of the stemflow <u>productionyield</u> of CK to that of SP) | $SF_b$              | 5–10               | 3.8                           | 3.3   | 2.6   | 2.3   | 3.4    | 2.6    | 2.8     |
|                                                                                                   |                     | 10–15              | 3.4                           | 2.8   | 2.2   | 1.8   | 2.5    | 2.0    | 2.2     |
|                                                                                                   |                     | 15–18              | 3.7                           | 2.9   | 2.3   | 1.9   | 2.6    | 2.2    | 2.3     |
|                                                                                                   |                     | >18                | 4.3                           | 2.8   | 2.6   | 2.2   | 2.8    | 2.1    | 2.4     |
|                                                                                                   |                     | Avg.(BD)           | 3.2                           | 2.4   | 2.0   | 1.6   | 2.3    | 1.7    | 1.9     |
|                                                                                                   | $SF_d$              | N/A                | 8.5                           | 2.2   | 1.3   | 1.0   | 1.5    | 1.2    | 1.3     |
| $SF\%$                                                                                            | N/A                 | 8.3                | 2.2                           | 1.4   | 1.1   | 1.4   | 1.1    | 1.4    |         |

Note: BD is the branch basal diameter; P is the precipitation amount; CK and SP are the abbreviations of *C. korshinskii* and *S. psammophila*,

1106

respectively.

1107

**Table 3.** Comparison of stemflow yield ( $SF_b$ ) of the foliated and manually defoliated *C. korshinskii* and *S. psammophila*.

| Leaf states           | BD categories (mm) | <i>C. korshinskii</i>              |       |       |       |        |          | <i>S. psammophila</i>              |       |       |       |       |       | $SF_b(CK)/SF_b(SP)$       |     |     |     |      |     |
|-----------------------|--------------------|------------------------------------|-------|-------|-------|--------|----------|------------------------------------|-------|-------|-------|-------|-------|---------------------------|-----|-----|-----|------|-----|
|                       |                    | Incident precipitation amount (mm) |       |       |       |        |          | Incident precipitation amount (mm) |       |       |       |       |       | Precipitation amount (mm) |     |     |     |      |     |
|                       |                    | 1.7                                | 6.7   | 6.8   | 7.6   | 22.6   | Avg. (P) | 1.7                                | 6.7   | 6.8   | 7.6   | 22.6  | (P)   | 1.7                       | 6.7 | 6.8 | 7.6 | 22.6 | (P) |
| Foliated              | 5–10               | 12.9                               | 85.1  | 93.0  | 77.7  | 254.8  | 104.7    | 3.6                                | 32.1  | 55.1  | 40.6  | 140.7 | 46.9  | 3.6                       | 2.7 | 1.7 | 1.9 | 1.8  | 2.2 |
|                       | 10–15              | 28.6                               | 197.0 | 274.6 | 190.1 | 694.3  | 276.9    | 10.1                               | 67.7  | 141.5 | 119.6 | 351.4 | 130.8 | 2.8                       | 2.9 | 1.9 | 1.6 | 2.0  | 2.1 |
|                       | ≥15                | 51.0                               | 382.3 | 616.0 | 370.7 | 1225.7 | 529.1    | 16.6                               | 112.5 | 279.9 | 272.9 | 721.3 | 279.6 | 3.1                       | 3.4 | 2.2 | 1.4 | 1.7  | 1.9 |
|                       | Avg.(BD)           | 30.2                               | 221.5 | 317.5 | 211.4 | 708.8  | 297.9    | 11.9                               | 82.4  | 191.6 | 178.6 | 489.6 | 186.6 | 2.5                       | 2.7 | 1.7 | 1.2 | 1.4  | 1.6 |
| Defoliated            | 5–10               | 17.3                               | 87.3  | 116.7 | 85.7  | 264.7  | 114.3    | 4.8                                | 22.3  | 46.7  | 43.5  | 152.7 | 52.4  | 3.6                       | 3.9 | 2.5 | 2.0 | 1.7  | 2.2 |
|                       | 10–15              | 11.0                               | 50.0  | 65.3  | 50.0  | 151.0  | 65.5     | 12.0                               | 72.4  | 159.2 | 118.2 | 396.8 | 129.0 | 0.9                       | 0.7 | 0.4 | 0.4 | 0.4  | 0.5 |
|                       | ≥15                | 14.7                               | 105.5 | 183.3 | 102.7 | 504.0  | 182.0    | 28.2                               | 177.8 | 460.1 | 326.0 | 947.3 | 358.7 | 0.5                       | 0.6 | 0.4 | 0.3 | 0.5  | 0.5 |
|                       | Avg.(BD)           | 13.2                               | 83.4  | 121.8 | 79.4  | 306.6  | 120.9    | 17.9                               | 110.2 | 288.6 | 198.4 | 626.3 | 223.3 | 0.7                       | 0.8 | 0.4 | 0.4 | 0.5  | 0.5 |
| $SF_b(Def)/SF_b(Fol)$ | 5–10               | 1.3                                | 1.0   | 1.3   | 1.1   | 1.0    | 1.2      | 1.3                                | 0.7   | 0.8   | 1.1   | 1.1   | 1.1   | N/A                       | N/A | N/A | N/A | N/A  | N/A |
|                       | 10–15              | 0.4                                | 0.3   | 0.2   | 0.3   | 0.2    | 0.3      | 1.2                                | 1.1   | 1.1   | 1.0   | 1.1   | 1.0   | N/A                       | N/A | N/A | N/A | N/A  | N/A |
|                       | ≥15                | 0.3                                | 0.3   | 0.3   | 0.3   | 0.4    | 0.3      | 1.7                                | 1.6   | 1.6   | 1.2   | 1.3   | 1.4   | N/A                       | N/A | N/A | N/A | N/A  | N/A |
|                       | Avg.(BD)           | 0.4                                | 0.4   | 0.4   | 0.4   | 0.4    | 0.4      | 1.5                                | 1.3   | 1.5   | 1.1   | 1.3   | 1.3   | N/A                       | N/A | N/A | N/A | N/A  | N/A |

1108

1109

1110

Note: BD is the branch basal diameter; P is the precipitation amount;  $SF_b(Def)/SF_b(Fol)$  refers to the ratio between branch stemflow volume of the foliated and manually defoliated shrubs; and  $SF_b(SP)/SF_b(CK)$  refers to the ratio between branch stemflow volume of *S. psammophila* and *C. korshinskii*; N/A refers to not applicable.

**Table 4.** Comparison of stemflow productivity (SFP) between the foliated *C. korshinskii* and *S. psammophila*.

| Intra- and inter-specific differences                                              | BD categories (mm) | Precipitation categories (mm) |      |      |       |       |      | Avg.(P) |
|------------------------------------------------------------------------------------|--------------------|-------------------------------|------|------|-------|-------|------|---------|
|                                                                                    |                    | ≤2                            | 2–5  | 5–10 | 10–15 | 15–20 | >20  |         |
| Intra-specific differences in <i>C. korshinskii</i> (CK)<br>(mL g <sup>-1</sup> )  | 5–10               | 0.20                          | 0.56 | 1.37 | 2.04  | 4.18  | 5.60 | 2.19    |
|                                                                                    | 10–15              | 0.19                          | 0.47 | 1.20 | 1.72  | 3.47  | 4.96 | 1.90    |
|                                                                                    | 15–18              | 0.17                          | 0.38 | 1.05 | 1.55  | 3.08  | 4.74 | 1.73    |
|                                                                                    | >18                | 0.15                          | 0.35 | 1.00 | 1.46  | 2.95  | 4.35 | 1.62    |
|                                                                                    | Avg.(BD)           | 0.19                          | 0.47 | 1.21 | 1.78  | 3.60  | 5.08 | 1.95    |
| Intra-specific differences in <i>S. psammophila</i> (SP)<br>(mL g <sup>-1</sup> )  | 5–10               | 0.11                          | 0.34 | 1.10 | 1.83  | 2.51  | 4.59 | 1.64    |
|                                                                                    | 10–15              | 0.08                          | 0.25 | 0.82 | 1.43  | 1.98  | 3.72 | 1.29    |
|                                                                                    | 15–18              | 0.05                          | 0.16 | 0.53 | 0.97  | 1.40  | 2.61 | 0.88    |
|                                                                                    | >18                | 0.05                          | 0.15 | 0.47 | 0.82  | 1.25  | 2.44 | 0.80    |
|                                                                                    | Avg.(BD)           | 0.07                          | 0.23 | 0.76 | 1.31  | 1.84  | 3.43 | 1.19    |
| Inter-specific differences<br>(the ratio of the SFP values<br>of CK to that of SP) | 5–10               | 1.8                           | 1.7  | 1.3  | 1.1   | 1.7   | 1.2  | 1.3     |
|                                                                                    | 10–15              | 2.4                           | 1.9  | 1.5  | 1.2   | 1.8   | 1.3  | 1.5     |
|                                                                                    | 15–18              | 2.8                           | 2.4  | 2.0  | 1.6   | 2.2   | 1.8  | 2.0     |
|                                                                                    | >18                | 3.0                           | 2.3  | 2.1  | 1.8   | 2.4   | 1.8  | 2.0     |
|                                                                                    | Avg.(BD)           | 2.7                           | 2.0  | 1.6  | 1.4   | 2.0   | 1.5  | 1.6     |

Note: BD is the branch basal diameter; P is the precipitation amount; CK and SP are the abbreviations of *C. korshinskii* and *S. psammophila*, respectively.

**Table 45.** Comparison of the ~~funneling~~funnelling ratio (FR) for ~~the foliated~~ *C. korshinskii* and *S. psammophila*.

| Intra- and inter-specific differences                                       | BA categories (°) | Precipitation categories (mm) |         |           |         |         |         | Avg.(P)   |
|-----------------------------------------------------------------------------|-------------------|-------------------------------|---------|-----------|---------|---------|---------|-----------|
|                                                                             |                   | ≤2                            | 2–5     | 5–10      | 10–15   | 15–20   | >20     |           |
| Intra-specific differences in <i>C. korshinskii</i> (CK)                    | ≤30               | 100.182                       | 127.687 | 168.141   | 125.303 | 193.061 | 170.313 | 149.909   |
|                                                                             | 30–60             | 125.899                       | 133.778 | 178.5     | 157.848 | 205.192 | 182.071 | 164.657   |
|                                                                             | 60–80             | 135.515                       | 148.942 | 192.455   | 165.838 | 217.030 | 188.646 | 176.061   |
|                                                                             | >80               | 133.172                       | 167.444 | 205.535   | 182.616 | 276.020 | 226.081 | 198.162   |
|                                                                             | Avg.(BA)          | 129.172                       | 144.848 | 187.747   | 162.343 | 219.616 | 190.343 | 173.343   |
| Intra-specific differences in <i>S. psammophila</i> (SP)                    | ≤30               | 32.606                        | 37.333  | 52.020    | 59.000  | 65.758  | 85.192  | 54.9755.0 |
|                                                                             | 30–60             | 34.505                        | 43.444  | 65.677    | 70.636  | 77.747  | 92.283  | 64.788    |
|                                                                             | 60–80             | 37.838                        | 47.929  | 77.9978.0 | 78.414  | 82.313  | 97.727  | 72.394    |
|                                                                             | >80               | 44.889                        | 54.995  | 93.455    | 94.747  | 94.091  | 115.727 | 85.576    |
|                                                                             | Avg.(BA)          | 36.657                        | 46.010  | 72.576    | 75.343  | 80.455  | 96.091  | 69.253    |
| Inter-specific differences (the ratio of the FR values of CK to that of SP) | ≤30               | 3.1                           | 3.4     | 3.2       | 2.1     | 2.9     | 2.0     | 2.7       |
|                                                                             | 30–60             | 3.7                           | 3.1     | 2.7       | 2.2     | 2.6     | 2.0     | 2.5       |
|                                                                             | 60–80             | 3.6                           | 3.1     | 2.5       | 2.1     | 2.6     | 1.9     | 2.4       |
|                                                                             | >80               | 3.0                           | 3.0     | 2.2       | 1.9     | 2.9     | 2.0     | 2.3       |
| Avg.(BA)                                                                    | 3.5               | 3.2                           | 2.6     | 2.2       | 2.7     | 2.0     | 2.5     |           |

Note: BA is the branch inclined angle; P is the precipitation amount; CK and SP are the abbreviations of *C. korshinskii* and *S. psammophila*, respectively.



1117 **Figure captions**

1118

1119 **Fig. 1.** Location of the experimental stands and facilities for stemflow measurements of *C.*  
1120 *korshinskii* and *S. psammophila* at the Liudaogou catchment in the Loess Plateau of  
1121 China.

1122

1123 **Fig. 2.** The controlled experiment for stemflow yield between the foliated and manually  
1124 defoliated shrubs~~Comparison of leaf morphologies of *C. korshinskii* and *S.*~~  
1125 ~~*psammophila*.~~

1126

1127 **Fig. 3**

1128 **Fig. 3.** Meteorological characteristics of rainfall events for stemflow measurements during the  
1129 2014 and 2015 rainy seasons.

1130

1131 **Fig. 4.** Verification of the allometric models for estimating the biomass and leaf traits of *C.*  
1132 *korshinskii*. BML and BMS refer to the biomass of the leaves and stems, respectively,  
1133 and LAB and LNB refer to the leaf area and the number of branches, respectively.

1134

1135 **Fig. 45.** Relationships of branch stemflow production volume ( $SF_b$ ), shrub stemflow depth  
1136 ( $SF_d$ ) and stemflow percentage ( $SF\%$ ) with precipitation amount (P) for *C. korshinskii*  
1137 and *S. psammophila*.

1138

1139 **Fig. 6.** Comparison of leaf morphologies of *C. korshinskii* and *S. psammophila*

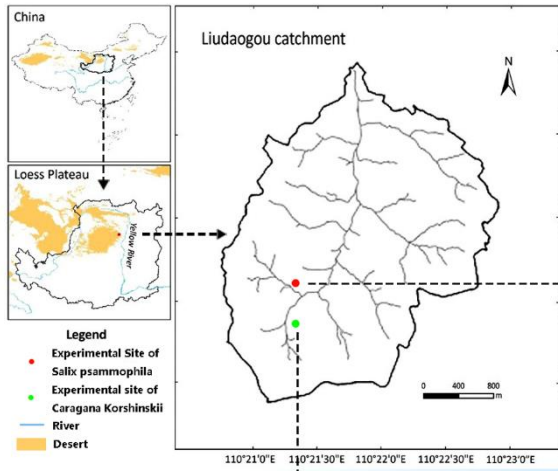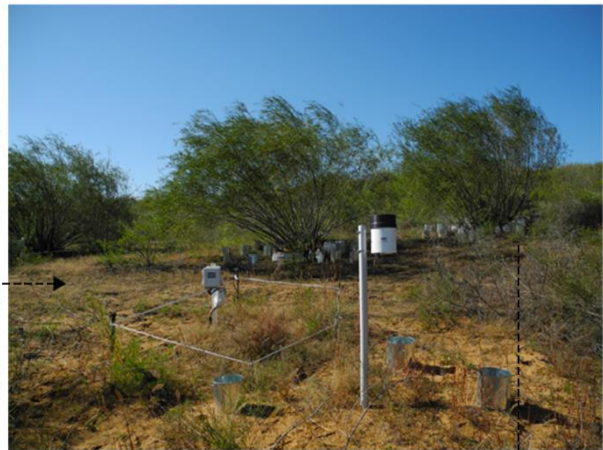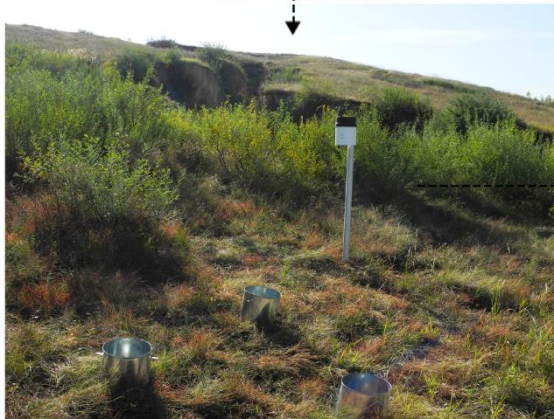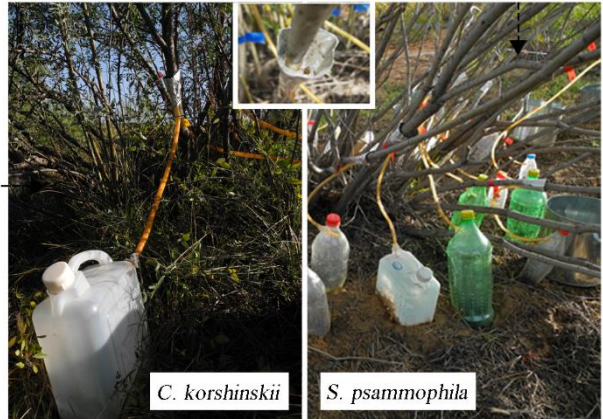

1140

1141

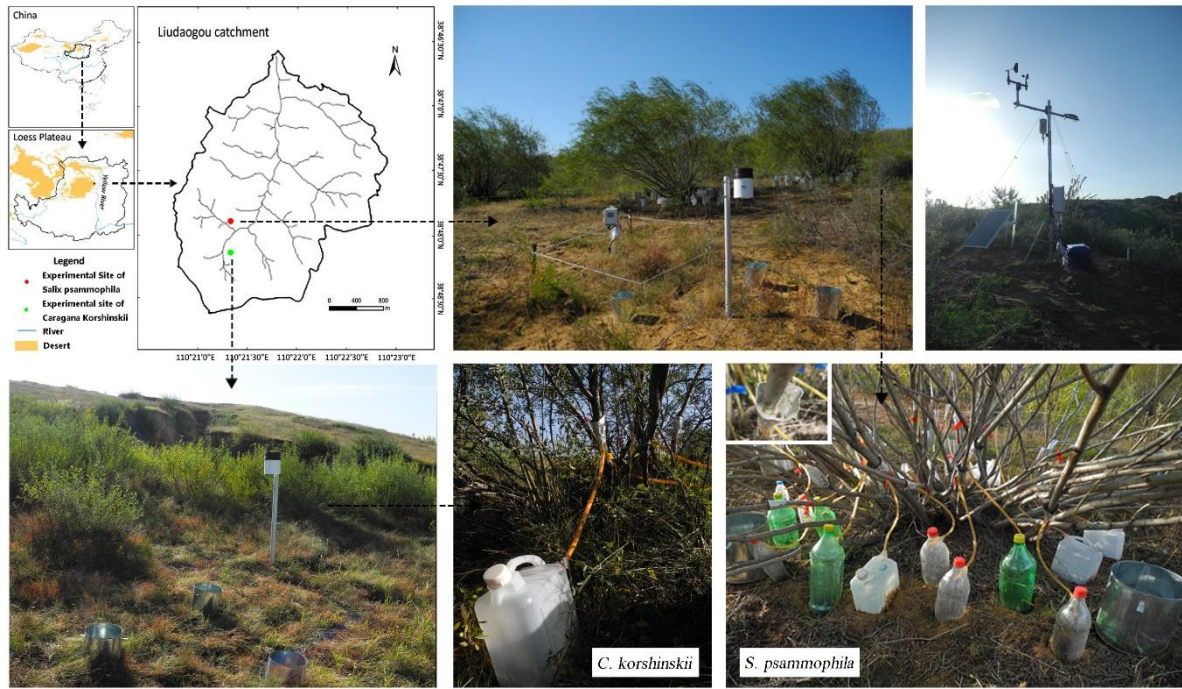

1142

1143

1144

**Fig. 1.** Location of the experimental stands and facilities for stemflow measurements of *C. korshinskii* and *S. psammophila* at the Liudaogou catchment in the Loess Plateau of China.—

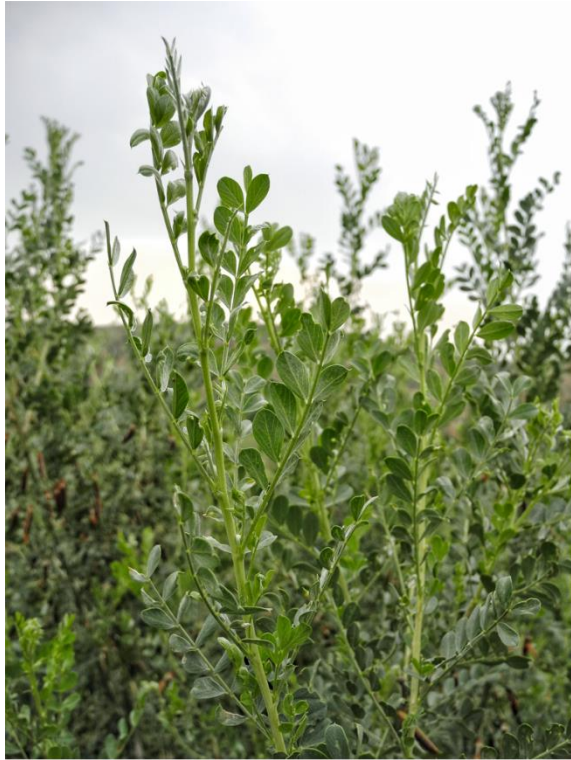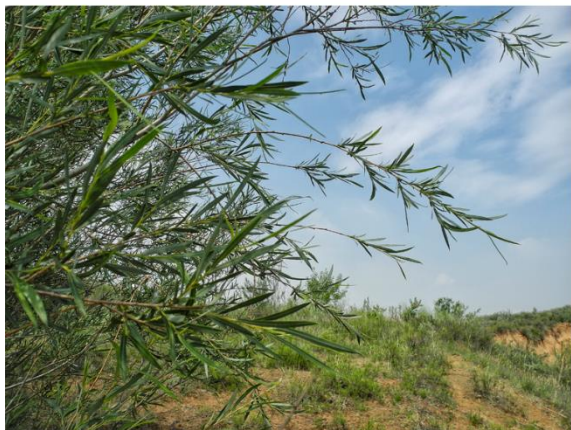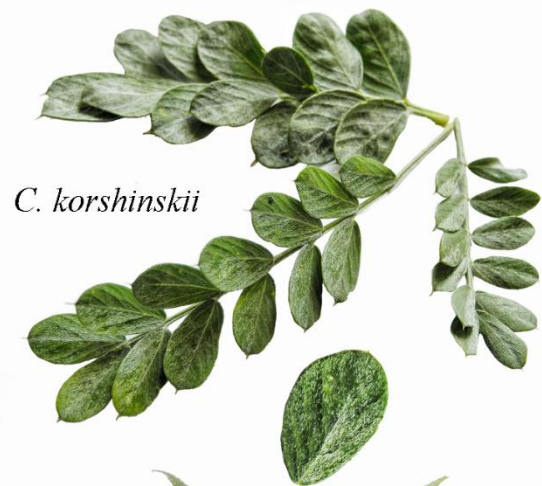

*C. korshinskii*

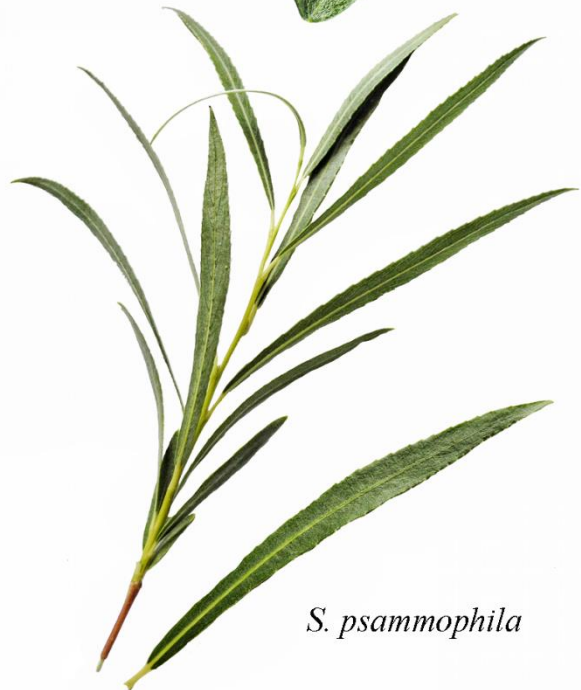

*S. psammophila*

Foliated

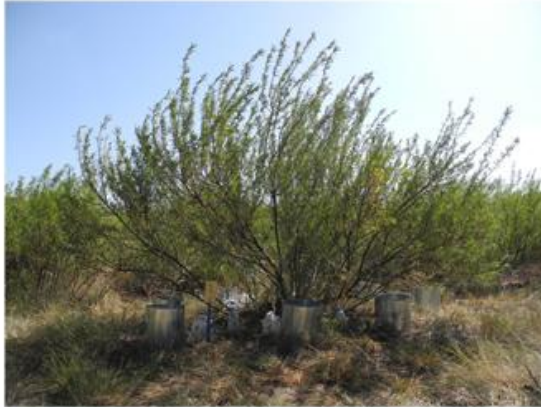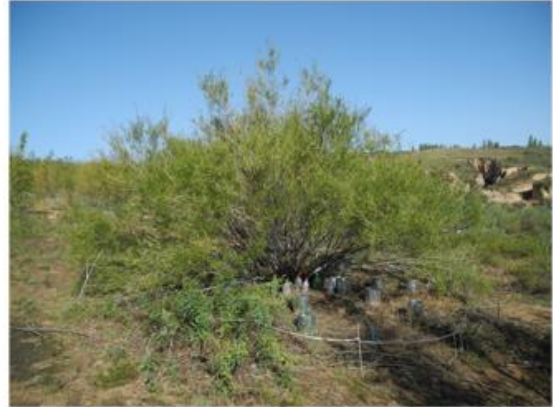

Defoliated

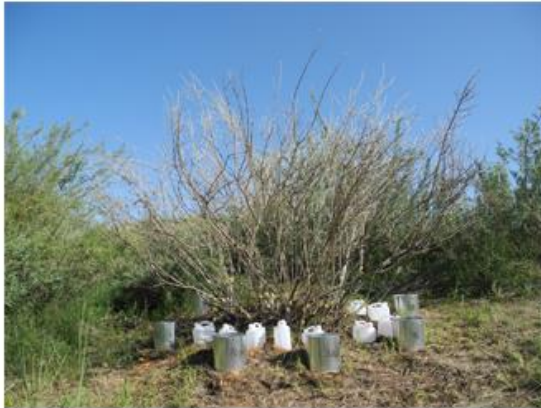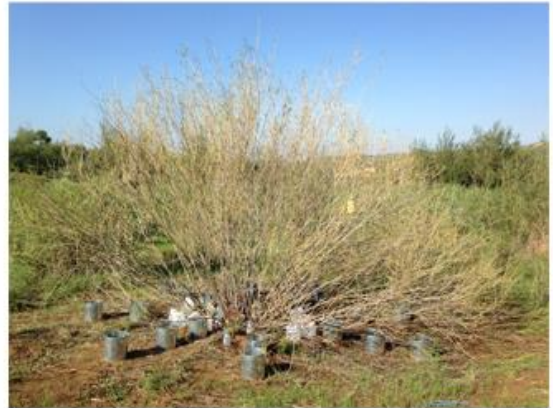

*C. korshinskii*

*S. psammophila*

1146

1147

1148

**Fig. 2.** The controlled experiment for stemflow yield between the foliated and manually defoliated shrubs.

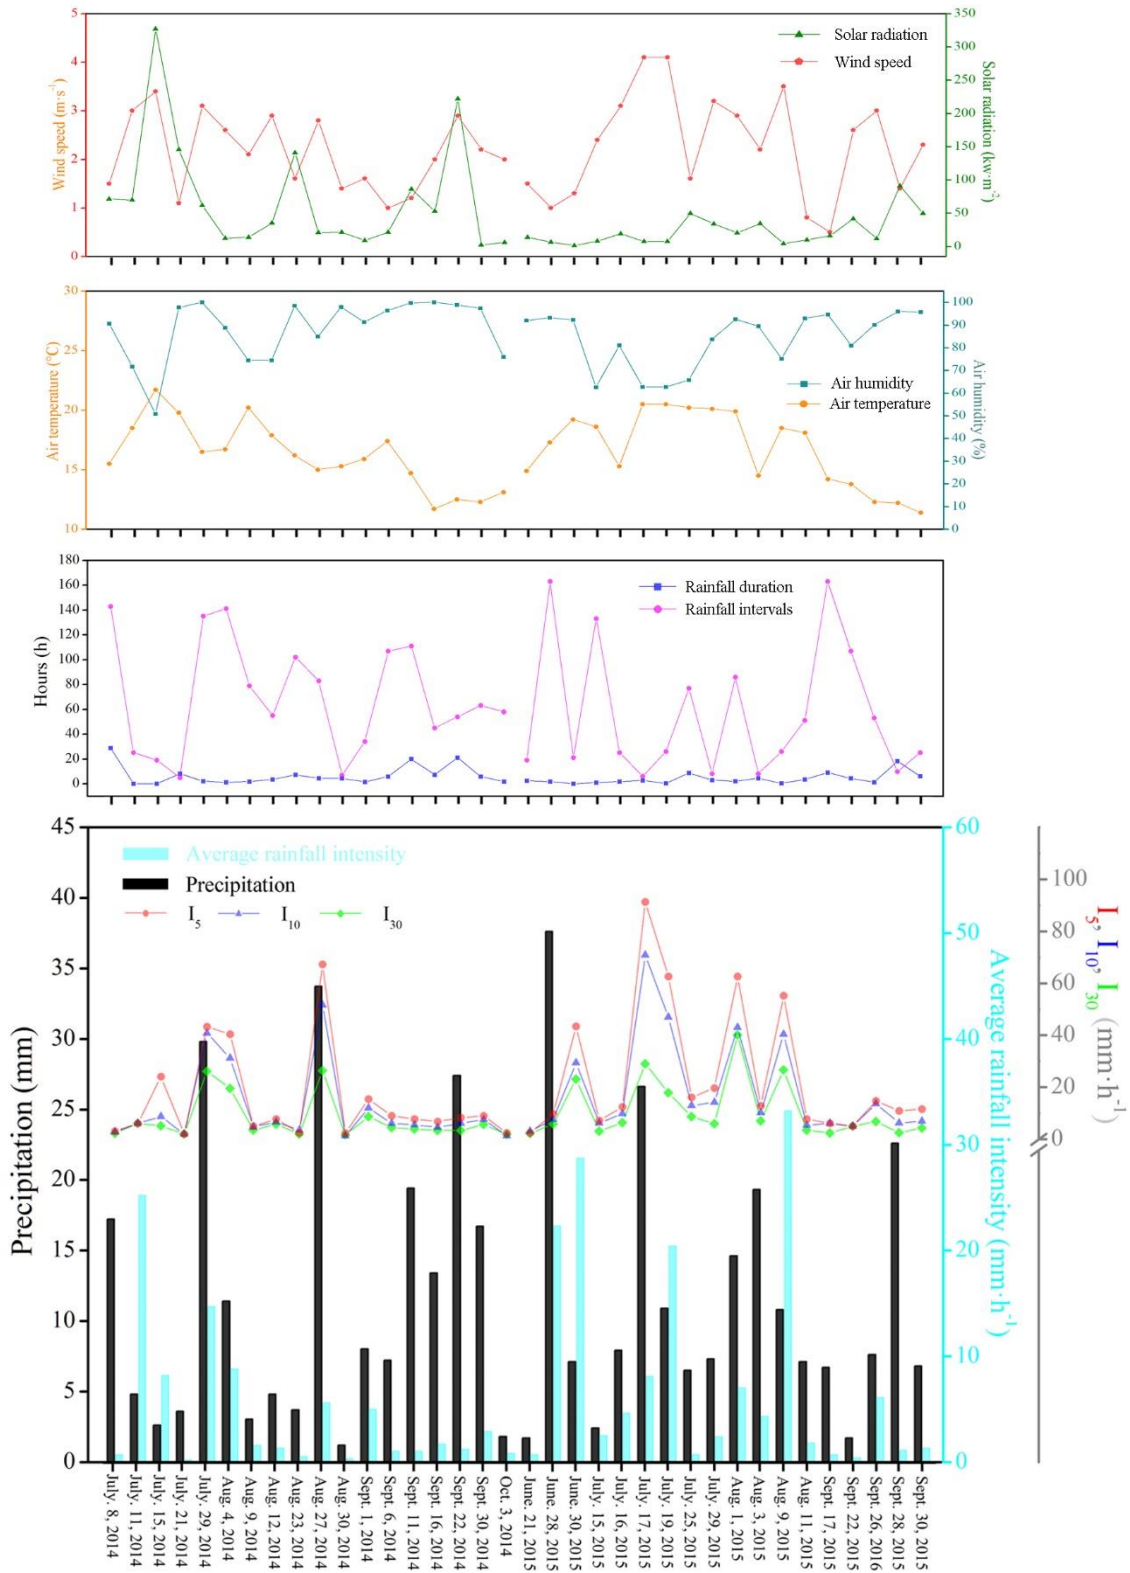

1149  
 1150  
 1151

**Fig. 3.** Meteorological characteristics of rainfall events for stemflow measurements during the 2014 and 2015 rainy seasons.

1152

1153

~~Fig. 2. Comparison of leaf morphologies of *C. korshinskii* and *S. psammophila*.~~

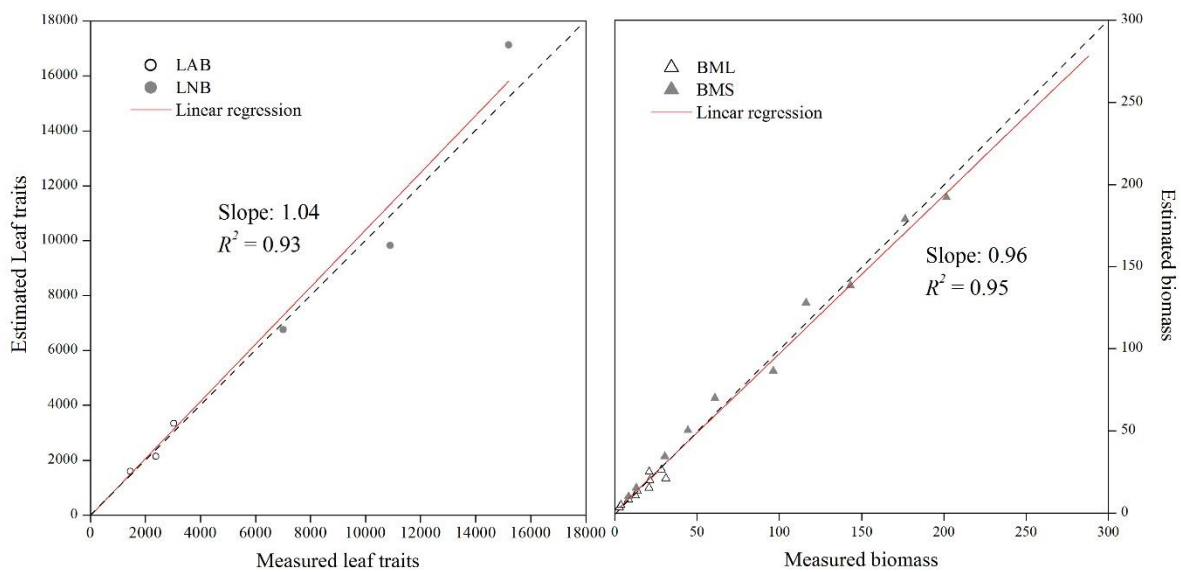

1154

1155 **Fig. 34.** Verification of the allometric models for estimating the biomass and leaf traits of *C.*  
1156 *korshinskii*. BML and BMS refer to the biomass of the leaves and stems, respectively, and  
1157 LAB and LNB refer to the leaf area and the number of branches, respectively.

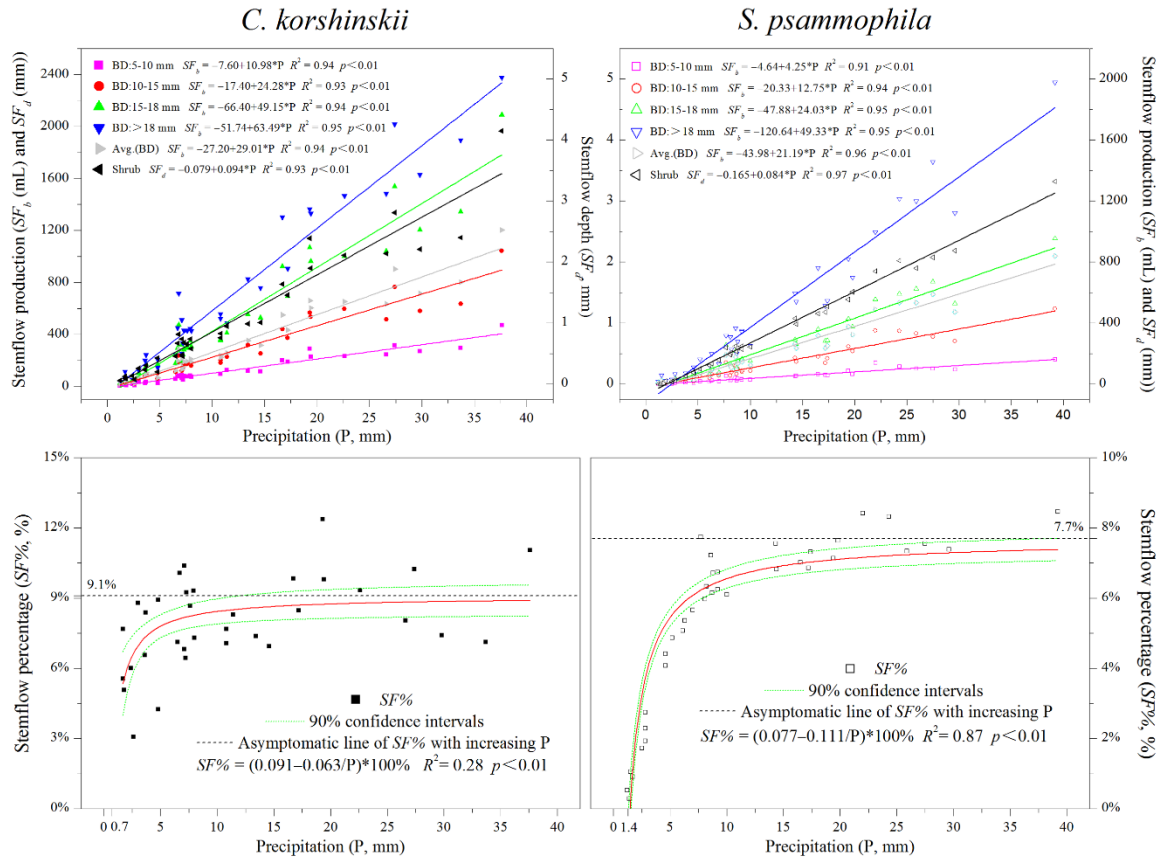

1158

1159 **Fig. 45.** Relationships of branch stemflow production volume ( $SF_b$ ), shrub stemflow depth  
 1160 ( $SF_d$ ) and stemflow percentage ( $SF\%$ ) with precipitation amount (P) for *C. korshinskii* and *S.*  
 1161 *psammophila*.



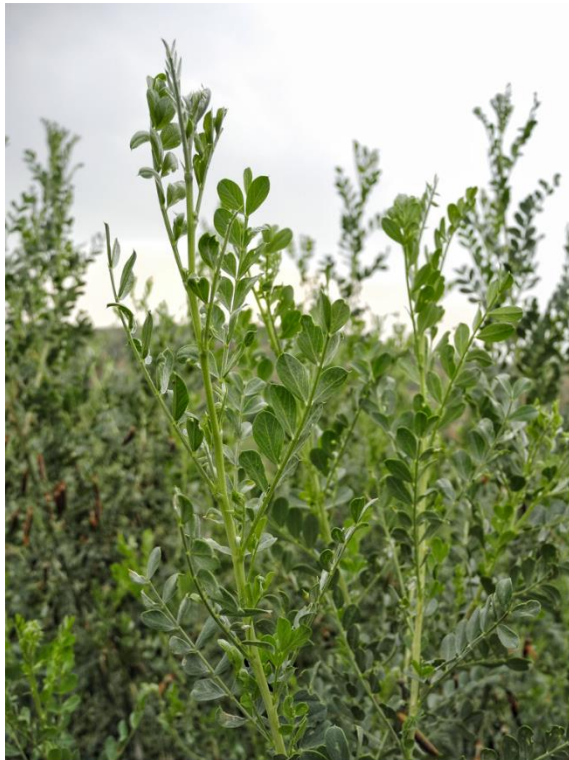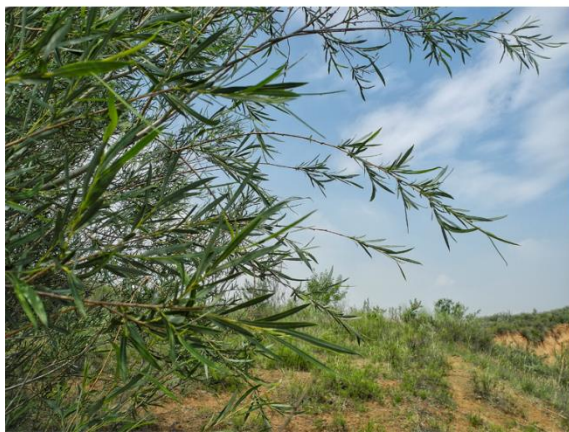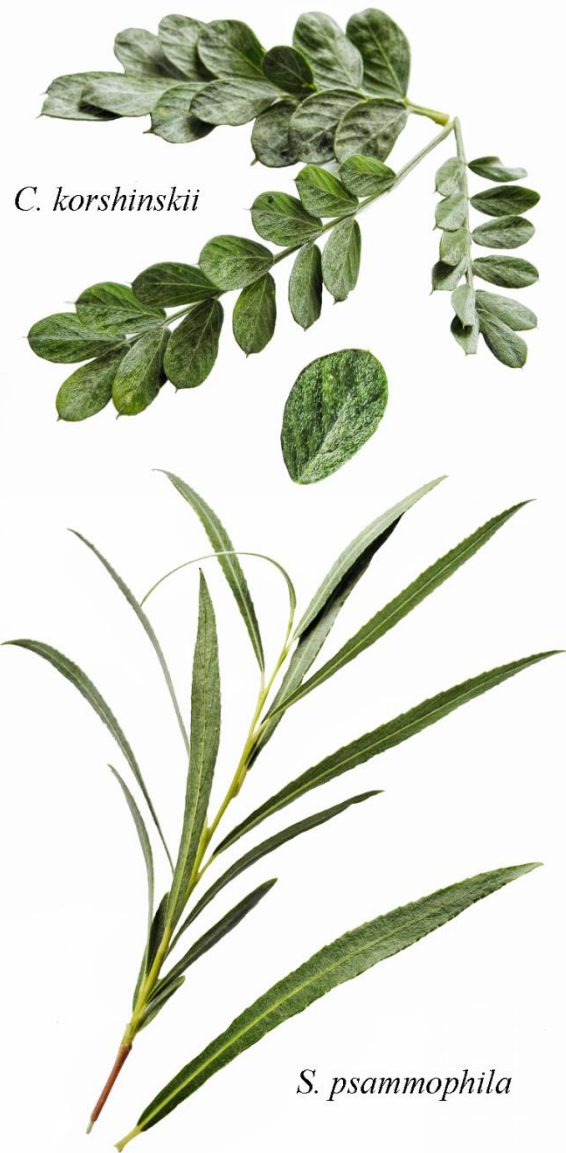

1162

1163

**Fig. 6.** Comparison of leaf morphologies of *C. korshinskii* and *S. psammophila*–

1 **Comparisons of stemflow and its bio-/abiotic influential factors**  
2 **between two xerophytic shrub species**

3  
4 **Chuan Yuan<sup>1,2</sup>, Guangyao Gao<sup>1,3</sup>, and Bojie Fu<sup>1,3</sup>**  
5

6 <sup>1</sup> State Key Laboratory of Urban and Regional Ecology, Research Center for Eco-  
7 Environmental Sciences, Chinese Academy of Sciences, Beijing 100085, China

8 <sup>2</sup> University of Chinese Academy of Sciences, Beijing 100049, China

9 <sup>3</sup> Joint Center for Global Change Studies, Beijing 100875, China

10

11 *Correspondence to:* **Guangyao Gao** ([gygao@rcees.ac.cn](mailto:gygao@rcees.ac.cn))

12 Tel.: +86 10 62841239

13 **Abstract.**

14 Stemflow transports enriched precipitation to the rhizosphere and functioned as an  
15 efficient terrestrial flux in water-stressed ecosystems. However, its ecological significance has  
16 generally been underestimated because it is relatively limited in amount, and the biotic  
17 mechanisms that affect it have not been thoroughly studied at the leaf scale. This study was  
18 conducted during the 2014 and 2015 rainy seasons at northern Loess Plateau of China. We  
19 measured the branch stemflow volume ( $SF_b$ ), shrub stemflow equivalent water depth ( $SF_d$ ),  
20 stemflow percentage of incident precipitation (SF%), stemflow productivity (SFP), funnelling  
21 ratio (FR), the meteorological characteristics and plant traits of branches and leaves of *C.*  
22 *korshinskii* and *S. psammophila*, respectively. This study evaluated stemflow efficiency for the  
23 first time with the combined results of SFP and FR, and sought to determine the inter- and intra-  
24 specific differences of stemflow yield and efficiency between the two species, as well as the  
25 specific bio-/abiotic mechanisms that affected stemflow. The results indicated that *C.*  
26 *korshinskii* had a greater stemflow yield and efficiency at all precipitation levels, and the largest  
27 inter-specific difference was generally in the 5–10 mm branches during rains of  $\leq 2$  mm.  
28 Precipitation amount was the most influential meteorological characteristic that affected  
29 stemflow yield and efficiency in these two endemic shrub species, and branch angle was the  
30 most influential plant trait on FR. For  $SF_b$ , stem biomass and leaf biomass were the most  
31 influential plant traits in *C. korshinskii* and *S. psammophila*, respectively. For SFP of these two  
32 shrubs, leaf traits (the individual leaf area) and branch traits (branch size and biomass allocation  
33 pattern) had great influence during smaller rains of  $\leq 10$  mm and heavier rains of  $> 15$  mm,  
34 respectively. The lower precipitation threshold of *C. korshinskii* to start stemflow (0.9 mm vs.  
35 2.1 mm for *S. psammophila*) entitled *C. korshinskii* to employ more rains to harvest water via  
36 stemflow. The beneficial leaf traits (e.g., leaf shape, arrangement, area, amount, etc.) might  
37 partly explain the great stemflow production of *C. korshinskii*. Comparison of  $SF_b$  between the  
38 foliated and manually defoliated shrubs during the 2015 rainy season indicated that the newly  
39 exposed branch surface at the defoliated period and the resulting rainfall intercepting effects  
40 might be an important mechanism affecting stemflow.

## 41 **1 Introduction**

42 Stemflow delivers precipitation pointedly into the root zone of a plant via preferential root  
43 paths, worm paths and soil macropores. The double-funnelling effects of stemflow and  
44 preferential flow create “hot spots” and “hot moments” by enhancing nutrients cycling rates at  
45 the surface soil matrix (McClain et al., 2003; Johnson and Lehmann, 2006; Sponseller, 2007),  
46 thus substantially contributing to the formation and maintenance of so-called “fertile islands”  
47 (Whitford et al., 1997), “resource islands” (Reynolds et al., 1999) or “hydrologic islands”  
48 (Rango et al., 2006). This effect is important for the normal function of rain-fed dryland  
49 ecosystems (Wang et al., 2011).

50 Shrubs are a representative plant functional type (PFT) in dryland ecosystems and have  
51 developed effective physiological drought tolerance by reducing water loss, e.g., through  
52 adjusting their photosynthetic and transpiration rate by regulating stomatal conductance and  
53 abscisic acid (ABA), titling their osmotic equilibrium by regulating the concentration of soluble  
54 sugars and inorganic ions, and removing free radicals (Ma et al., 2004, 2008). The stemflow, a  
55 vital eco-hydrological flux, is involved in replenishing soil water at shallow and deep layers  
56 (Pressland 1973), particularly the root zone (Whitford et al., 1997; Dunkerley 2000; Yang  
57 2010), even during light rains (Li et al., 2009). It might allow the endemic shrubs to remain  
58 physically active during drought spells (Navar and Bryan, 1990; Navar, 2011). The stemflow  
59 is an important potential source for available water at rain-fed dryland ecosystem (Li et al.,  
60 2013). Therefore, producing stemflow with a greater amount in a more efficient manner might  
61 be an effective strategy to utilize precipitation by reducing the evaporation loss (Devitt and  
62 Smith, 2002; Li et al., 2009), acquire water (Murakami, 2009) and withstand drought  
63 (Martinez-Meza and Whitford, 1996). However, because stemflow occurs in small amounts,  
64 previous studies have usually ignored stemflow (Llorens and Domingo, 2007; Zhang et al.,  
65 2016) and have underestimated its disproportionately high influence on xerophytic shrub

66 species (Andersson, 1991; Levia, et al., 2003; Li, 2011). Therefore, it is important to quantify  
67 the inter- and intra-specific stemflow yield, to assess the stemflow production efficiency and  
68 to elucidate the underlying bio-/abiotic mechanisms.

69 Stemflow yield includes the stemflow volume and depth, and it describes the total flux  
70 delivered down to the base of a branch or a trunk, but stemflow data are unavailable for  
71 comparison of inter-specific differences caused by variations in the branch architecture, the  
72 canopy structure, the shrub species and the eco-zone. Herwitz (1986) introduced the funnelling  
73 ratio (FR), which was expressed as the quotient of the volume of stemflow yield and the product  
74 of the base area and the precipitation amount. It indicates the efficiency with which individual  
75 branches or shrubs capture raindrops and deliver the water to the root zone (Siegert and Levia,  
76 2014). The FR allows a comparison of the inter- and intra-specific stemflow yield under  
77 different precipitation conditions. However, the FR does not provide a good connection  
78 between hydrological processes (e.g., rainfall redistribution) and the plant growth processes  
79 (e.g., biomass accumulation and allocation). Recently, Yuan et al. (2016) have introduced the  
80 parameter of stemflow productivity (SFP), expressed as the volume of stemflow yield per unit  
81 of branch biomass. The SFP describes the efficiency in an energy-conservation manner by  
82 comparing the stemflow yield of a unit biomass increment of different-sized branches.

83 The precipitation amount is an abiotic mechanism that has generally been recognized as  
84 the single most influential rainfall characteristic (Clements 1972; Andr e et al., 2008; Van Stan  
85 et al., 2014). However, in terms of biotic mechanisms, although the canopy structure  
86 (Mauchamp and Janeau, 1993; Crockford and Richardson, 2000; Pypker et al., 2011) and  
87 branch architecture (Herwitz, 1987; Murakami 2009; Carlyle-Moses and Schooling, 2015)  
88 have been studied for years, the most important plant traits that vary with location and shrub  
89 species have not yet been determined. The effects of the leaves have been studied more recently  
90 at a smaller scale, e.g., leaf orientation (Crockford and Richardson, 2000), shape (Xu et al.,

91 2005), arrangement pattern (Owens et al., 2006), pubescence (Garcia-Estringana et al., 2010),  
92 area (Sellin et al., 2012), epidermis microrelief (Roth-Nebelsick et al., 2012), amount (Li et al.,  
93 2016), biomass (Yuan et al., 2016), etc. Although comparisons of stemflow yield during  
94 summer (the growing or foliated season) and winter (the dormant or defoliated season)  
95 generally indicate negative effects of leaves because the more stemflow occurred at the leafless  
96 period (Dolman, 1987; Masukata et al., 1990; Neal et al., 1993; Muzyło et al., 2012), both  
97 negligible and positive effects have also been confirmed by Martinez-Meza and Whitford  
98 (1996), Deguchi et al. (2006) and Liang et al. (2009). Nevertheless, the validity of these  
99 findings has been called into question as a result of the seasonal variation of meteorological  
100 conditions and plant traits, e.g., wind speed (André et al., 2008), rainfall intensity (Dunkerley  
101 et al., 2014a, b), air temperature and consequent precipitation type (snow-to-rain vs. snow)  
102 (Levia, 2004). Besides, they ignore the effects of the exposed stems at leafless period, which  
103 comprise of a new canopy-atmosphere interface and substitute the leaves to intercept raindrops.  
104 Therefore, a controlled experiment with the foliated and manually defoliated plants under the  
105 same stand conditions is needed to resolve these uncertainties.

106 In this study, the branch stemflow volume ( $SF_b$ ), the shrub stemflow depth ( $SF_d$ ), the  
107 stemflow percentage of the incident precipitation amount (SF%), the SFP and the FR were  
108 measured in two xerophytic shrub species during the 2014 and 2015 rainy seasons. Furthermore,  
109 a controlled experiment with defoliated and manually defoliated shrubs was conducted for the  
110 two shrub species during the 2015 rainy season. The detailed objectives were to (1) quantify  
111 the inter- and intra-specific stemflow yield ( $SF_b$ ,  $SF_d$  and SF%) and efficiency (SFP and FR) at  
112 different precipitation levels; (2) identify the most influential meteorological characteristics  
113 affecting stemflow yield, and (3) investigate the biotic influential mechanism of plant traits  
114 especially at the finer leaf scale by comparing the stemflow yield in the defoliated and manually  
115 defoliated shrubs. Given that only the aboveground eco-hydrological process was involved, we

116 focused on stemflow in this study. The achievement of these research objectives would advance  
117 our understanding of the ecological importance of stemflow for dryland shrubs and the  
118 significance of leaves from an eco-hydrological perspective.

119

## 120 **2 Materials and Methods**

### 121 **2.1 Study area**

122 This study was conducted at the Liudaogou catchment (110°21'–110°23'E, 38°46'–  
123 38°51'N) in Shenmu County in the Shaanxi Province of China. It is 6.9 km<sup>2</sup> and 1094–1273 m  
124 above sea level (a.s.l.). This area has a semiarid continental climate with well-defined rainy  
125 and dry seasons. The mean annual precipitation (MAP) between 1971 and 2013 was 414 mm,  
126 with approximately 77% of the annual precipitation amount occurring during the rainy season  
127 (Jia et al., 2013), which lasts from July to September. The mean annual temperature and  
128 potential evaporation are 9.0 °C and 1337 mm year<sup>-1</sup> (Zhao et al., 2010), respectively. The  
129 coldest and warmest months are January and July, with an average monthly temperature of  
130 9.7 °C and 23.7 °C, respectively. Two soil types of Aeolian sandy soil and Ust-Sandiic Entisol  
131 dominate this catchment (Jia et al., 2011). Soil particles consist of 11.2%–14.3% clay, 30.1%–  
132 44.5% silt and 45.4%–50.9% sand in terms of the soil classification system of United States  
133 Department of Agriculture (Zhu and Shao, 2008). The original plants are scarcely present,  
134 except for very few surviving shrub species, e.g., *Ulmus macrocarpa*, *Xanthoceras sorbifolia*,  
135 *Rosa xanthina*, *Spiraea salicifolia*, etc. The currently predominant shrub species were planted  
136 decades ago, e.g., *S. psammophila*, *C. Korshinskii*, *Amorpha fruticosa*, etc., and the  
137 predominant grass species include *Medicago sativa*, *Stipa bungeana*, *Artemisia capillaris*,  
138 *Artemisia sacrorum*, etc. (Ai et al., 2015).

139 *C. Korshinskii* and *S. psammophila* are endemic shrub species in arid and semiarid  
140 northern China and were planted for wind-proofing and dune-stabilizing. Two representative

141 experimental stands were established in the southwest of the Liudaogou catchment (Fig. 1).  
142 Both *C. korshinskii* and *S. psammophila* were multi-stemmed shrubs that had an inverted-cone  
143 canopy and no trunk, with the branches running obliquely from the base. *C. korshinskii* usually  
144 grew to 2 m and had pinnate compound leaves with 12–16 foliates in an opposite or sub-  
145 opposite arrangement (Wang et al., 2013). The leaf of *C. korshinskii* was concave and  
146 lanceolate-shaped, with an acute leaf apex and an obtuse base. Both sides of the leaves were  
147 densely sericeous with appressed hairs (Liu et al., 2010). In comparison, *S. psammophila*  
148 usually grew to 3–4 m and had an odd number of strip-shaped leaves of 2–4 mm in width and  
149 40–80 mm in length. The young leaves were pubescent and gradually became subglabrous  
150 (Chao and Gong, 1999). These two shrub species were planted approximately twenty years ago,  
151 and the two stands share a similar slope of 13–18 °, a size of 3294–4056 m<sup>2</sup>, and an elevation  
152 of 1179–1207 m a.s.l. However, the *C. korshinskii* experimental stand had a 224 ° aspect with  
153 a loess ground surface, whereas the *S. psammophila* experimental stand had a 113 ° aspect with  
154 a sand ground surface.

155  
156 Fig. 1. Location of the experimental stands and facilities for stemflow measurements of *C.*  
157 *korshinskii* and *S. psammophila* at the Liudaogou catchment in the Loess Plateau of China.  
158

## 159 **2.2 Field experiments**

160 Field experiments were conducted during the rainy seasons of 2014 (July 1 to October 3)  
161 and 2015 (June 1 to September 30) to measure the meteorological characteristics, plant traits  
162 and stemflow. To avoid the effects of gully micro-geomorphology on meteorological recording,  
163 we installed an Onset® (Onset Computer Corp., Bourne, MA, USA) RG3-M tipping bucket  
164 rain gauge (0.2 mm per tip) at each experimental stand. Three 20-cm-diameter rain gauges were  
165 placed around to adjust the inherent underestimating of automatic precipitation recording  
166 (Groisman and Legates, 1994). Then, the rainfall characteristics, e.g., rainfall duration (RD, h),  
167 rainfall interval (RI, h), the average rainfall intensity (I, mm h<sup>-1</sup>), the maximum rainfall



168 intensity in 5 min ( $I_5$ , mm h<sup>-1</sup>), 10 min ( $I_{10}$ , mm h<sup>-1</sup>) and 30 min ( $I_{30}$ , mm h<sup>-1</sup>) could be  
169 calculated accordingly. In this study, the individual rainfall events were greater than 0.2 mm  
170 and separated by a period of at least four hours without rain (Giacomin and Trucchi, 1992).  
171 Besides, a meteorological stations was also installed at each experimental stand to record other  
172 meteorological characteristics (Fig. 1), e.g., wind speed (WS, m s<sup>-1</sup>) and direction (WD, °)  
173 (Model 03002, R. M. Young Company, Traverse City, Michigan, USA), the air temperature  
174 (T, °C) and humidity (H, %) (Model HMP 155, Vaisala, Helsinki, Finland), and the solar  
175 radiation (SR, kw m<sup>-2</sup>) (Model CNR 4, Kipp & Zonen B.V., Delft, the Netherland).

176 *C. korshinskii* and *S. psammophila*, as modular organisms and multi-stemmed shrub  
177 species, have branches of that seek their own survival goals and compete with each other for  
178 lights and water (Firn, 2004; Allaby, 2010). They are ideal experiment objects to conduct  
179 stemflow study at the branch scale. Therefore, we focused on branch stemflow and ignored the  
180 canopy variance by experimenting on sample shrubs that had a similar canopy structure. Four  
181 mature shrubs were selected for *C. korshinskii* (designated as C1, C2, C3 and C4) and *S.*  
182 *psammophila* (designated as S1, S2, S3 and S4) for the stemflow measurements. They had  
183 isolated canopies, similar intra-specific canopy heights and areas, e.g., 2.1 ± 0.2 m and 5.1 ±  
184 0.3 m<sup>2</sup> for C1–C4, and 3.5 ± 0.2 m and 21.4 ± 5.2 m<sup>2</sup> for S1–S4. We measured the  
185 morphological characteristics of all the 180 branches of C1–C4 and all the 261 branches of S1–  
186 S4, including the branch basal diameter (BD, mm), branch length (BL, cm) and branch  
187 inclination angle (BA, °). The leaf area index (LAI) and the foliage orientation (MTA, the mean  
188 tilt angle of leaves) were measured using LiCor® (LiCor Biosciences Inc., Lincoln, NE, USA)  
189 2200C plant canopy analyser approximately twice a month.

190 A total of 53 branches of *C. korshinskii* (17, 21, 7, 8 for the basal diameter categories of  
191 5–10 mm, 10–15 mm, 15–18 mm and >18 mm, respectively) and 98 branches of *S.*  
192 *psammophila* (20, 30, 20 and 28 branches at the BD categories 5–10 mm, 10–15 mm, 15–18

193 mm and >18 mm, respectively) were selected for stemflow measurements following the criteria:  
194 1) no intercrossing stems; 2) no turning point in height from branch tip to the base (Dong, et  
195 al., 1987); 3) representativeness in amount and branch size. Stemflow was collected using  
196 aluminum foil collars, which was fitted around the entire branch circumference and close to  
197 the branch base and sealed by neutral silicone caulking (Fig. 1). Nearly all sample branches  
198 were selected on the skirts of the crown, where was more convenient for installation and made  
199 the sample branches limited shading by other branches lying above as well. Associated with  
200 the limited external diameter of foil collars, that minimized the accessing of throughfall (both  
201 free and released). A 0.5-cm-diameter PVC hose led the stemflow to lidded containers. The  
202 stemflow yield was measured within two hours after the rainfall ended during the daytime; if  
203 the rainfall ended at night, we took the measurement early the next morning. After completing  
204 measurements, we return stemflow back to the branch base to mitigate the unnecessary drought  
205 stress for the sample branches. By doing so, we tried the best to measure the authentic stemflow  
206 yield at branch scale with least unnecessary disturbance, including the effects of free and  
207 released throughfall on stemflow measurements in this manuscript.

208 Besides, the controlled experiment with foliated and manually defoliated shrubs was  
209 conducted during the rainy season of 2015 for *C. korshinskii* (five rain events from September  
210 18 to September 30) and for *S. psammophila* (ten rain events from August 2 to September 30)  
211 (Fig. 2). Considering the workload to remove all the leaves of 85 branches and 94 branches at  
212 *C. korshinskii* (designated as C5) and *S. psammophila* (designated as S5) nearly twice a month,  
213 only one shrub individual was selected with similar intra-specific canopy height and area (2.1  
214 m and 5.8 m<sup>2</sup> for C5, 3.3 m and 19.9 m<sup>2</sup> for S5) as other sampled shrubs. A total of 10 branches  
215 of C5 (3, 3 and 4 branches at the BD categories 5–10 mm, 10–15 mm and >15 mm), and 17  
216 branches of S5 (4, 5 and 7 branches at the BD categories 5–10 mm, 10–15 mm and >15 mm)  
217 were selected for stemflow measurements. Given a limited amount of sample branches and

218 rainfall events, stemflow measurements in this experiment were just used for a comparison  
219 with that of the foliated shrubs, but not for a quantitative analysis with meteorological  
220 characteristics and plant traits. If no specific stating, it was important to notice that the stemflow  
221 yield and efficiency in this study referred to those of the foliated shrubs.

222  
223 Fig. 2. The controlled experiment for stemflow yield between the foliated and manually  
224 defoliated shrubs.

225

226 Another three shrubs of each species were destructively measured for biomass and leaf  
227 traits. They had similar canopy heights and areas as those of the shrubs for which the stemflow  
228 was measured and were designated as C6–C8 (2.0–2.1 m and 5.8–6.8 m<sup>2</sup>) and S6–S8 (3.0–3.4  
229 m and 15.4–19.2 m<sup>2</sup>), thus allowing the development of allometric models for the estimation  
230 of the corresponding biomass and leaf traits of C1–C5 and S1–S5 (Levia and Herwitz, 2005;  
231 Siles et al., 2010a, b; Stephenson et al., 2014). A total of 66 branches for C6–C8 and 61  
232 branches for S6–S8 were measured once during mid-August for the biomass of leaves and  
233 stems (BML and BMS, g), the leaf area of the branches (LAB, cm<sup>2</sup>), and the leaf numbers of  
234 the branches (LNB), when the shrubs showed maximum vegetative growth. The BML and  
235 BMS were weighted after oven-drying of 48 hours. The detailed measurements have been  
236 reported in Yuan et al., (2016). The validity of the allometric models was verified by measuring  
237 another 13 branches of C6–C8 and 14 branches of S6–S8.

238

### 239 **2.3 Calculations**

240 Biomass and leaf traits were estimated by allometric models as an exponential function of  
241 BD (Siles et al., 2010a, b; Jonard et al., 2006):

$$242 \quad PT_e = a * BD^b \quad (1)$$

243 where  $a$  and  $b$  are constants, and  $PT_e$  refers to the estimated plant traits BML, BMS, LAB and

244 LNB. The other plant traits could be calculated accordingly, including individual leaf area of  
 245 branch ( $ILAB = 100 * LAB / LNB$ ,  $mm^2$ ), and the percentage of stem biomass to that of branch  
 246 ( $PBMS = BMS / (BML + BMS) * 100\%$ , %). Besides, the total stem surface area of individual  
 247 branch (SA) was computed representing by that of the main stem, which was idealized as the  
 248 cone ( $SA = \pi * BD * BL / 20$ ,  $cm^2$ ). So that, specific surface area representing with LAB ( $SSAL$   
 249  $= LAB / (BML + BMS)$ ,  $cm^2 g^{-1}$ ) and in SA ( $SSAS = SA / (BML + BMS)$ ,  $cm^2 g^{-1}$ ) could be  
 250 calculated. It was important to notice that this method underestimated the real stem surface  
 251 area by ignoring the collateral stems and assuming main stem as the standard corn, so the SA  
 252 and SSAS would not feed into the quantitative analysis, but apply to reflect a general  
 253 correlation with  $SF_b$  in this study.

254 In this study, stemflow yield was defined as the branch hereafter “stemflow production”,  
 255  $SF_b$ , mL), the equivalent water depth on the basis of shrub canopy area (hereafter “stemflow  
 256 depth”,  $SF_d$ , mm), and the stemflow percentage of the incident precipitation amount (hereafter  
 257 “stemflow percentage”, SF%, %):

$$258 \quad SF_d = 10 * \sum_{i=1}^n SF_{bi} / CA \quad (2)$$

$$259 \quad SF\% = (SF_d / P) * 100\% \quad (3)$$

260 where  $SF_{bi}$  is the volume of stemflow yield of branch  $i$  (mL), CA is the canopy area ( $cm^2$ ),  $n$  is  
 261 the number of branches, and P is the incident precipitation amount (mm).

262 Stemflow productivity (SFP,  $mL g^{-1}$ ) was expressed as the  $SF_b$  (mL) of unit branch  
 263 biomass (g) and represented the stemflow efficiency of different-sized branches in association  
 264 with biomass allocation pattern:

$$265 \quad SFP = SF_b / (BML + BMS) \quad (4)$$

266 The funnelling ratio (FR) was computed as the quotient of  $SF_b$  and the product of P and  
 267 BBA (Herwitz, 1986). A FR with a value greater than 1 indicated a positive effect of the  
 268 canopy on the stemflow yield (Carlyle-Moses and Price, 2006). The value of (P \* BBA) equals

269 to the precipitation amount that would have been caught by the rain gauge occupying the same  
270 basal area in a clearing:

$$271 \quad \text{FR} = 10 * SF_b / (P * \text{BBA}) \quad (5)$$

272

## 273 **2.4 Data analysis**

274 A Pearson correlation analysis was performed to test the relationship between  $SF_b$  and each  
275 of the meteorological characteristics and plant traits. Significantly correlated variables were  
276 further tested with a partial correlation analysis for their separate effects on  $SF_b$ . Then, the  
277 qualified variables were fed into a stepwise regression with forward selection to identify the  
278 most influential bio-/abiotic factors (Carlyle-Moses and Schooling, 2015; Yuan et al., 2016).  
279 Similarly to a principal component analysis and ridge regression, stepwise regression has  
280 commonly been used because it gets a limited effect of multicollinearity (Návar and Bryan,  
281 1990; Honda et al., 2015; Carlyle-Moses and Schooling, 2015). Moreover, we excluded  
282 variables that had a variance inflation factor (VIF) greater than 10 to minimize the effects of  
283 multicollinearity (O'Brien, 2007), and kept the regression model having the least AIC values  
284 and largest  $R^2$ . The separate contribution of individual variables to stemflow yield and  
285 efficiency was computed by the method of variance partitioning. The same analysis methods  
286 were also applied to identify the most influential bio-/abiotic factors affecting SFP and FR. The  
287 level of significance was set at 95% confidence interval ( $p = 0.05$ ). The SPSS 20.0 (IBM  
288 Corporation, Armonk, NY, USA), Origin 8.5 (OriginLab Corporation, Northampton, MA,  
289 USA), and Excel 2013 (Microsoft Corporation, Redmond, WA, USA) were used for data  
290 analysis.

291

## 292 **3 Results**

### 293 **3.1 Meteorological characteristics**

294 Stemflow was measured at 36 rainfall events in this study, 18 events (209.8 mm) in 2014  
295 and 18 events (205.3 mm) in 2015, which accounted for 32.7% and 46.2% of total rainfall  
296 events, and 73.1% and 74.9% of total precipitation amount during the experimental period of  
297 2014 and 2015, respectively (Fig. 3). There were 4, 7, 10, 5, 4 and 6 rainfall events at  
298 precipitation categories of  $\leq 2$  mm, 2–5 mm, 5–10 mm, 10–15 mm, 15–20 mm, and  $>20$  mm,  
299 respectively. The average rainfall intensity of incident rainfall events was  $6.3 \pm 1.5$  mm h<sup>-1</sup>,  
300 and the average value of I<sub>5</sub>, I<sub>10</sub> and I<sub>30</sub> were  $20.3 \pm 3.9$  mm h<sup>-1</sup>,  $15.0 \pm 2.9$  mm h<sup>-1</sup> and  $9.2 \pm 1.6$   
301 mm h<sup>-1</sup>, respectively. RD and RI were averaged  $5.5 \pm 1.1$  h and  $63.1 \pm 8.2$  h. The average T, H,  
302 SR, WS and WD were  $16.5 \pm 0.5$  °C,  $85.9\% \pm 2.2\%$ ,  $48.5 \pm 11.2$  kw m<sup>-2</sup>,  $2.2 \pm 0.2$  m s<sup>-1</sup> and  
303  $167.1 \pm 13.9$ , respectively.

304  
305 Fig. 3. Meteorological characteristics of rainfall events for stemflow measurements during the  
306 2014 and 2015 rainy seasons.

307

### 308 **3.2 Species-specific variation of plant traits**

309 Allometric models were developed to estimate the biomass and leaf traits of the branches  
310 of *C. korshinskii* and *S. psammophila* measured for stemflow. The quality of the estimates was  
311 verified by linear regression. As shown in Fig. 4, the regression of LAB, LNB, BML and BMS  
312 of *C. korshinskii* had an approximately 1:1 slope (0.99 for the biomass indicators and 1.04 for  
313 the leaf traits) and an  $R^2$  value of 0.93–0.95. According to Yuan et al., (2016), the regression of  
314 *S. psammophila* had a slope of 1.13 and an  $R^2$  of 0.92. Therefore, those allometric models were  
315 appropriate.

316  
317 Fig. 4. Verification of the allometric models for estimating the biomass and leaf traits of *C.*  
318 *korshinskii*. BML and BMS refer to the biomass of the leaves and stems, respectively, and LAB  
319 and LNB refer to the leaf area and the number of branches, respectively.

320

321 *C. korshinskii* had a similar average branch size and angle, but a shorter branch length  
322 than did *S. psammophila*, e.g.,  $12.5 \pm 4.2$  mm vs.  $13.7 \pm 4.4$  mm,  $60 \pm 18$  ° vs.  $60 \pm 20$  °, and

323 161.5 ± 35.0 cm vs. 267.3 ± 49.7 cm, respectively. Regarding branch biomass accumulation,  
324 *C. korshinskii* had a smaller BML (an average of 19.9 ± 10.8 g) and a larger BMS (an average  
325 141.1 ± 110.8 g) than did *S. psammophila* (an average of 27.9 ± 20.7 g and 130.7 ± 101.4 g,  
326 respectively). Both the BML and BMS increased with increasing branch size for these two  
327 shrub species. When expressed as a proportion, *C. korshinskii* had a larger PBMS than did *S.*  
328 *psammophila* in all the BD categories. The PBMS-specific difference increased with an  
329 increasing branch size, ranging from 1.2% for the 5–10 mm branches to 7.2% for the >18 mm  
330 branches.

331 Although an increase in LAB and LNB and a decrease in ILAB, SSAL and SSAS were  
332 observed for both shrub species with increasing branch size, *C. korshinskii* had a larger LAB  
333 (an average of 2509.1 ± 1355.3 cm<sup>2</sup>), LNB (an average of 12479 ± 8409) and SSAL (18.2 ±  
334 0.5 cm<sup>2</sup> g<sup>-1</sup>), but a smaller ILAB (an average of 21.9 ± 3.0 mm<sup>2</sup>) and SSAS (2.5 cm<sup>2</sup> g<sup>-1</sup>) than  
335 did *S. psammophila* for each BD level (averaged 1797.9 ± 1118.0 g, 2404 ± 1922, 12.7 ± 0.4  
336 cm<sup>2</sup> g<sup>-1</sup>, 93.1 ± 27.8 mm<sup>2</sup> and 5.1 ± 0.3 cm<sup>2</sup> g<sup>-1</sup>) (Table 1). The inter-specific differences in the  
337 leaf traits decreased with increasing branch size. The largest difference occurred for the 5–10  
338 mm branches, e.g., LNB and LAB were 12.2-fold and 2.4-fold larger for *C. korshinskii*, and  
339 ILAB was 5.3-fold larger for *S. psammophila*.

340  
341 Table 1. Comparison of branch morphology, biomass and leaf traits of *C. korshinskii* and *S.*  
342 *psammophila*.

### 344 **3.3 Stemflow yield of the foliated and defoliated *C. korshinskii* and *S. psammophila***

345 In this study, stemflow yield was expressed as  $SF_b$  on the branch scale and  $SF_d$  and SF%  
346 on the shrub scale. For the foliated shrubs,  $SF_b$  was averaged 290.6 mL and 150.3 mL for  
347 individual branches of *C. korshinskii* and *S. psammophila*, respectively, per incident rainfall  
348 events during the 2014 and 2015 rainy seasons. The  $SF_b$  was positively correlated with the  
349 branch size and precipitation of these two shrub species. As the branch size increased,  $SF_b$

350 increased from the average of 119.0 mL for the 5–10 mm branches to 679.9 mL for the >18  
351 mm branches for *C. korshinskii* and from 43.0 mL to 281.8 mL for the corresponding BD  
352 categories of *S. psammophila*. However, with increasing precipitation, a larger intra-specific  
353 difference in  $SF_b$  was observed, which increased from the average of 28.4 mL during rains  $\leq 2$   
354 mm to 771.4 mL during rains >20 mm for *C. korshinskii* and from 9.0 mL to 444.3 mL for the  
355 corresponding precipitation categories of *S. psammophila*. The intra-specific differences in  $SF_b$   
356 were significantly affected by the rainfall characteristics and the plant traits. Up to 2375.9 mL  
357 was averaged for the >18 mm branches of *C. korshinskii* during rains >20 mm at the 2014 and  
358 2015 rainy seasons, but only the average  $SF_b$  of 6.8 mL occurred for the 5–10 mm branches  
359 during rains  $\leq 2$  mm. For comparison, a maximum  $SF_b$  of 2097.6 mL and a minimum of 1.8 mL  
360 were averaged for *S. psammophila*.

361 *C. korshinskii* produced a larger  $SF_b$  than did *S. psammophila* for all BD and precipitation  
362 categories, and the inter-specific differences in  $SF_b$  also varied substantially with the rainfall  
363 characteristics and the plant traits. A maximum difference of 4.3-fold larger for the  $SF_b$  of *C.*  
364 *korshinskii* was observed for the >18 mm branches during rains  $\leq 2$  mm at the 2014 and 2015  
365 rainy seasons. As the precipitation increased, the  $SF_b$ -specific difference decreased from 3.2-  
366 fold larger for *C. korshinskii* during rains  $\leq 2$  mm to 1.7-fold larger during rains >20 mm. The  
367 largest  $SF_b$ -specific difference occurred for the 5–10 mm branches for almost all precipitation  
368 categories, but no clear trend of change was observed with increasing branch size (Table 2).

369  $SF_d$  and SF% averaged 1.0 mm and 8.0% per incident rainfall events during the 2014 and  
370 2015 rainy seasons, respectively, for individual *C. korshinskii* shrubs and 0.8 mm and 5.5%,  
371 respectively, for individual *S. psammophila* shrubs. These parameters increased with increasing  
372 precipitation, ranging from 0.09 mm and 5.8% during rains  $\leq 2$  mm to 2.6 mm and 8.9% during  
373 rains >20 mm for *C. korshinskii* and from less than 0.01 mm and 0.7% to 2.2 mm and 7.9% for  
374 the corresponding precipitation categories of *S. psammophila*, respectively. Additionally, the



375 individual *C. korshinskii* shrubs had a larger stemflow yield than did *S. psammophila* for all  
376 precipitation categories. The differences in  $SF_d$  and SF% maximized as a 8.5- and 8.3-fold  
377 larger for *C. korshinskii* during rains  $\leq 2$  mm and decreased with increasing precipitation to 1.2-  
378 and 1.1-fold larger during rains  $> 20$  mm.

379  
380 Table 2. Comparison of stemflow yield ( $SF_b$ ,  $SF_d$  and SF%) between the foliated *C. korshinskii*  
381 and *S. psammophila*.  
382

383 While comparing the intra-specific difference of  $SF_b$  between different leaf states,  $SF_b$  of  
384 the defoliated *S. psammophila* was 1.3-fold larger than did the foliated *S. psammophila* on  
385 average, ranging from the 1.1-, 1.0- and 1.4-fold larger for the 5–10 mm, 10–15 mm and  $> 15$   
386 mm branches, respectively. A larger difference was noted during smaller rains (Table 3). On  
387 the contrary,  $SF_b$  of the defoliated *C. korshinskii* was averaged 2.5-fold smaller than did the  
388 foliated *C. korshinskii* at all rainfall events. Except for a 1.2-fold larger at the 5–10 mm  
389 branches, the 3.3-fold smaller of  $SF_b$  was measured at the 10–15 mm and  $> 15$  mm branches of  
390 the defoliated *C. korshinskii* than did the foliated *C. korshinskii* (Table 3). While comparing  
391 the  $SF_b$ -specific difference at the same leaf states, a smaller  $SF_b$  of the foliated *S. psammophila*  
392 was noted than did the foliated *C. korshinskii*. However,  $SF_b$  of the defoliated *S. psammophila*  
393 was 2.0-fold larger than did the defoliated *C. korshinskii* on average at nearly all BD categories  
394 except for the 5–10 mm branches (Table 3).

395  
396 Table 3. Comparison of stemflow yield ( $SF_b$ ) of the foliated and manually defoliated *C.*  
397 *korshinskii* and *S. psammophila*.  
398

### 399 **3.4 Stemflow efficiency of *C. korshinskii* and *S. psammophila***

400 With the combined results of SFP and FR, stemflow efficiency were assessed for *C.*  
401 *korshinskii* and *S. psammophila*. SFP averaged  $1.95 \text{ mL g}^{-1}$  and  $1.19 \text{ mL g}^{-1}$  for individual *C.*  
402 *korshinskii* and *S. psammophila* branches, respectively per incident rainfall events during the

403 2014 and 2015 rainy seasons (Table 4). As precipitation increased, SFP increased from 0.19  
404 mL g<sup>-1</sup> during rains ≤2 mm to 5.08 mL g<sup>-1</sup> during rains >20 mm for *C. korshinskii* and from  
405 0.07 mL g<sup>-1</sup> to 3.43 mL g<sup>-1</sup> for the corresponding precipitation categories for *S. psammophila*.  
406 With an increase in branch size, SFP decreased from 2.19 mL g<sup>-1</sup> for the 5–10 mm branches to  
407 1.62 mL g<sup>-1</sup> for the >18 mm branches of *C. korshinskii* and from 1.64 mL g<sup>-1</sup> to 0.80 mL g<sup>-1</sup>  
408 for the corresponding BD categories of *S. psammophila*. Maximum SFP values of 5.60 mL g<sup>-1</sup>  
409 <sup>1</sup> and 4.59 mL g<sup>-1</sup> were recorded for *C. korshinskii* and *S. psammophila*, respectively.  
410 Additionally, *C. korshinskii* had a larger SFP than did *S. psammophila* for all precipitation and  
411 BD categories. This inter-specific difference in SFP decreased with increasing precipitation  
412 from 2.5-fold larger for *C. korshinskii* during rains ≤2 mm to 1.5-fold larger during rains >20  
413 mm, and it increased with increasing branch size: from 1.3-fold larger for *C. korshinskii* for the  
414 5–10 mm branches to 2.0-fold larger for the >18-mm branches.

415  
416 Table 4. Comparison of stemflow productivity (SFP) between the foliated *C. korshinskii* and  
417 *S. psammophila*.

418

419 FR averaged 172.3 and 69.3 for the individual branches of *C. korshinskii* and *S.*  
420 *psammophila* per rainfall events during the 2014 and 2015 rainy seasons, respectively (Table  
421 5). As the precipitation increased, an increasing trend was observed, ranging from the average  
422 FR of 129.2 during rains ≤2 mm to 190.3 during rains >20 mm for *C. korshinskii* and from the  
423 average FR of 36.7 to 96.1 during the corresponding precipitation categories for *S.*  
424 *psammophila*. FR increased with increasing BA from the average of 149.9 for the ≤30°  
425 branches to 198.2 for the >80 °branches of *C. korshinskii* and from the average of 55.0 to 85.6  
426 for the corresponding BA categories of *S. psammophila*. Maximum FR values of 276.0 and  
427 115.7 were recorded for *C. korshinskii* and *S. psammophila*, respectively. Additionally, *C.*  
428 *korshinskii* had a larger FR than *S. psammophila* for all precipitation and BA categories. The  
429 inter-specific difference in FR decreased with increasing precipitation from the 3.5-fold larger

430 for *C. korshinskii* during rains  $\leq 2$  mm to 2.0-fold larger during rains  $>20$  mm, and it decreased  
431 with an increase in the branch inclination angle: from 2.7-fold larger for *C. korshinskii* for the  
432  $\leq 30^\circ$  branches to 2.3-fold larger for the  $>80^\circ$  branches.

433  
434 Table 5. Comparison of the funnelling ratio (FR) between the foliated *C. korshinskii* and *S.*  
435 *psammophila*.

436

### 437 **3.5 Bio-/abiotic influential factors of stemflow yield and efficiency**

438 For both *C. korshinskii* and *S. psammophila*, BA was the only plant trait that had no  
439 significant correlation with  $SF_b$  ( $r < 0.13$ ,  $p > 0.05$ ) as indicated by Pearson correlation analysis.  
440 The separate effects of the remaining plant traits were verified by using a partial correlation  
441 analysis, but BL, ILAB and PBMS failed this test. The rest of plant traits, including BD, LAB,  
442 LNB, BML and BMS, were regressed with  $SF_b$  by using the forward selection method. Biomass  
443 was finally identified as the most important biotic indicator that affected stemflow, which  
444 behaved differently in *C. korshinskii* for BMS and in *S. psammophila* for BML. The same  
445 methods were applied to analyse the influence of meteorological characteristics on  $SF_b$  of these  
446 two shrub species. Tested by the Pearson correlation and partial correlation analyses,  $SF_b$   
447 related significantly with the precipitation amount,  $I_{10}$ , RD and H for *C. korshinskii*, and with  
448 P,  $I_5$ ,  $I_{10}$ ,  $I_{30}$  for *S. psammophila*. The step-wise regression finally identified the precipitation  
449 amount as the most influential meteorological characteristics for the two shrub species.  
450 Although  $I_{10}$  was another influential factor for *C. korshinskii*, it only made a 15.6% contribution  
451 to the  $SF_b$  on average.

452  $SF_b$  and  $SF_d$  had a good linear relationship with the precipitation amount ( $R^2 \geq 0.93$ ) for  
453 both shrub species (Fig. 5). The  $>0.9$  mm and  $>2.1$  mm rains were required to start  $SF_b$  for *C.*  
454 *korshinskii* and *S. psammophila*, respectively, results consistent with the 0.8 mm and 2.0 mm  
455 precipitation threshold calculated with  $SF_d$ . Moreover, the precipitation threshold increased  
456 with increasing branch size. The precipitation threshold values were 0.7 mm, 0.7 mm, 1.4 mm

457 and 0.8 mm for the 5–10 mm, 10–15 mm, 15–18 mm and >18 mm branches of *C. korshinskii*,  
458 respectively, and 1.1 mm, 1.6 mm, 2.0 mm and 2.4 mm for the branches of *S. psammophila*,  
459 respectively.

460 The SF% of the two shrub species also increased with precipitation, but was inversely  
461 proportional and gradually approached asymptotic values of 9.1% and 7.7% for *C. korshinskii*  
462 and *S. psammophila*, respectively. As shown in Fig. 5, fast growth was evident during rains  
463  $\leq 10$  mm, but SF% slightly increased afterwards for both shrub species.

464 Fig. 5. Relationships of branch stemflow volume ( $SF_b$ ), shrub stemflow depth ( $SF_d$ ) and  
465 stemflow percentage (SF%) with precipitation amount (P) for *C. korshinskii* and *S.*  
466 *psammophila*.  
467  
468

469 Precipitation amount was the most important factor affecting SFP and FR for *C. korshinskii*  
470 and *S. psammophila*, but the most important biotic factor was different. BA was the most  
471 influential plant trait that affected FR of these two shrub species at all precipitation levels.  
472 ILAB was the most important plant trait affecting SFP during rains  $\leq 10$  mm of these species.  
473 However, during heavier rain  $> 15$  mm, BD and PBMS were the most significant biotic factors  
474 for *C. korshinskii* and *S. psammophila*, respectively. For these two shrubs species, it was leaf  
475 trait (ILAB) and branch traits (biomass allocation pattern and branch size) that played bigger  
476 roles on SFP during smaller rains  $\leq 10$  mm and heavier rains  $> 15$  mm, respectively. So, it  
477 seemed that the rainfall interception process of leaves controlled SFP during the smaller rains,  
478 which functioned as the water resource for stemflow production. But while water supply was  
479 adequate during heavier rains, the stemflow delivering process of branches might be the  
480 bottleneck.

481

## 482 **4 Discussion**

### 483 **4.1 Differences of stemflow yield and efficiency between two shrub species**

484 Stemflow yield in *C. korshinskii* and *S. psammophila* increased with increasing  
485 precipitation and branch size at both the branch ( $SF_b$ ) and shrub scales ( $SF_d$  and SF%). However,  
486 *C. korshinskii* had larger  $SF_b$ ,  $SF_d$  and SF% values than did *S. psammophila* for all precipitation  
487 categories (Table 2). Although the greatest stemflow yield was observed during rains >20 mm  
488 for the two shrub species, the inter-specific differences of  $SF_b$ ,  $SF_d$  and SF% were highest at  
489 3.2-, 8.5- and 8.3-fold larger for *C. korshinskii* during rains  $\leq 2$  mm, respectively. Additionally,  
490 *C. korshinskii* had a 2.8-fold larger  $SF_b$  than did *S. psammophila* for the 5–10 mm branches.  
491 Therefore, compared with *S. psammophila*, more effectively might *C. korshinskii* employ  
492 precipitation via greater stemflow yield, particularly the 5–10 mm young shoots during rains  
493  $\leq 2$  mm.

494 The FR values indicated the stemflow efficiency with which individual branches could  
495 intercept and deliver raindrops (Siegert and Levia, 2014). The average FR of individual  
496 branches of *S. psammophila* was 69.3 per individual rainfall during the 2014 and 2015 rainy  
497 seasons, which agreed well with the 69.4 of *S. psammophila* in the Mu Us sandland of China  
498 (Yang et al., 2008). The average FR of individual branches of *C. korshinskii* was 173.3 in this  
499 study, in contrast to the values of 156.1 (Jian et al., 2014) and 153.5 (Li et al., 2008) for *C.*  
500 *korshinskii* at western Loess Plateau of China. Furthermore, these two shrub species had a  
501 larger FR than those of many other endemic xerophytic shrubs at water-stressed ecosystems,  
502 e.g., *Tamarix ramosissima* (24.8) (Li et al., 2008), *Artemisia sphaerocephala* (41.5) (Yang et  
503 al., 2008), *Reaumuria soongorica* (53.2) (Li et al., 2008), *Hippophae rhamnoides* (62.2) (Jian  
504 et al., 2014). Both of *C. korshinskii* and *S. psammophila* employed precipitation in an efficient  
505 manner to produce stemflow, and *C. korshinskii* produced stemflow even more efficiently for  
506 all precipitation categories particularly during rains  $\leq 2$  mm, the inter-specific difference of  
507 which decreased with increasing precipitation (Table 5).

508 The higher stemflow efficiency of *C. korshinskii* for all the precipitation and BD categories

509 was also supported by SFP (Table 4), which characterized stemflow efficiency of different-  
510 sized branches in association with biomass allocating patterns. Besides, for both of *C.*  
511 *korshinskii* and *S. psammophila*, the highest SFP was noted at the 5–10 mm branches, 2.19  
512 mL g<sup>-1</sup> vs. 1.64 mL g<sup>-1</sup> on average, and the maximum of 5.60 mL g<sup>-1</sup> vs. 4.59 mL g<sup>-1</sup> during  
513 rains >20 mm (Table 4).

514 In conclusion, compared with *S. psammophila*, *C. korshinskii* employed different-sized  
515 rains to produce stemflow in a greater amount and more efficient manner. That meant a lot for  
516 xerophytic shrubs particularly during the rainy season. Because, during this period, they foliate,  
517 bloom, reproduce and compete with each other for lights and water. The great water demand  
518 made them sensitive to the precipitation variation. It was common for dryland shrubs to  
519 experience several wetting-drying cycles (Cui and Caldwell, 1997) when rains are sporadic.  
520 The hierarchy of rainfall events has a corresponding hierarchy of ecological responses at the  
521 arid environment (Schwinning and Sala, 2004), including the rapid root nutrient uptaking  
522 (Jackson and Caldwell, 1991), root elongating (Brady et al., 1995), Mycorrhizal hyphae  
523 infection (Jasper et al., 1993), etc. That benefited the formation and maintenance of “fertile  
524 islands” (Whitford et al., 1997), “resource islands” (Reynolds et al., 1999) or “hydrologic  
525 islands” (Rango et al., 2006). Given that the stemflow was well documented as an important  
526 source of rhizosphere soil moisture at dryland ecosystems (Dunkerley, 2000; Yang, 2010;  
527 Navar, 2011; Li, et al., 2013), *C. korshinskii* produced stemflow with a greater amount in an  
528 more efficient manner might be of great importance in employing precipitation to acquire water  
529 (Murakami, 2009) at dryland ecosystems.

530

#### 531 **4.2 Effects of precipitation threshold to produce stemflow**

532 Precipitation below the threshold wet the canopy and finally evaporated, so it theoretically  
533 did not generate stemflow. The  $\leq 2.5$  mm rains were entirely intercepted and evaporated to the

534 atmosphere for the xerophytic Ashe juniper communities at the central Texas of USA (Owens  
535 et al., 2006), as well as most of the  $\leq 5$  mm rains, particularly at the beginning raining stage for  
536 xerophytic shrubs (*S. psammophila*, *Hedysarum scoparium*, *A. sphaerocephala* and *Artemisia*  
537 *ordosica*) at the Mu Us sandland of China (Yang, 2010). The precipitation threshold of  
538 xerophytic shrub species was as small as 0.3 mm for *T. vulgaris* at northern Lomo Herrero of  
539 Spain (Belmonte and Romero, 1998), but up to 2.7 mm for *A. farnesiana* at Linares of Mexico  
540 (Návar and Bryan, 1990). In this study, at least a 0.9 mm rainfall was necessary to initiate  
541 stemflow in *C. korshinskii*, which was in the range of 0.4–1.4 mm at the precipitation threshold  
542 for *C. korshinskii* (Li et al., 2009; Wang et al., 2014). This result was consistent with the 0.8  
543 mm for *R. officinalis* at northern Lomo Herrero of Spain (Belmont and Romero, 1998) and 0.6  
544 mm for *M. squamosa* at Qinghai-Tibet plateau of China (Zhang et al., 2015). Comparatively,  
545 *S. psammophila* needed a 2.1 mm precipitation threshold to initiate stemflow, which was  
546 consistent with the 2.2 mm threshold of *S. psammophila* in the Mu Us sandland (Li et al., 2009)  
547 and the 1.9 mm threshold for *R. soongorica* at western Loess Plateau (Li et al., 2008) and the  
548 1.8 mm threshold for *A. ordosica* at Tengger desert of China (Wang et al., 2013). Generally, for  
549 many xerophytic shrub species, the precipitation threshold generally ranges in 0.4–2.2 mm.

550 Scant rainfall was the most prevalent type in arid and semiarid regions. Rains  $\leq 5$  mm  
551 accounted for 74.8% of the annual rainfall events and 27.7% of the annual precipitation amount  
552 at the Anjiapo catchment at western Loess Plateau of China (with a MAP of 420 mm) (Jian et  
553 al., 2014). While at Haizetan at southern Mu Us sandland of China (with a MAP of 394.7 mm),  
554 rains  $\leq 5$  mm accounted for 49.0% of all the rainfall events and 13.8% of the total precipitation  
555 amount of rainy season (lasting from May to September) (Yang, 2010). Additionally, rains  $\leq 2.5$   
556 mm accounted for 60% of the total rainfall events and 5.4% of the total precipitation amount  
557 at eastern Edwards Plateau, the central Texas of USA (with a MAP of 600–900 mm) (Owens  
558 et al., 2006). In this study, rains  $\leq 2$  mm accounted for 45.7% of all the rainfall events and 7.2%

559 of the precipitation amount during the 2014 and 2015 rainy seasons. In general, *C. korshinskii*  
560 and *S. psammophila* produced stemflow during 71 (75.5% of the total rainfall events) and 51  
561 rainfall events (54.3% of the total rainfall events), respectively. Because the precipitation  
562 threshold for *S. psammophila* was 2.1 mm, 20 rainfall events of 1–2 mm, which encompassed  
563 21.3% of all rainfall events during the rainy season, did not produce stemflow, but stemflow  
564 yield during rains 1–2 mm was an extra benefit for *C. korshinskii*. Although the total amount  
565 was limited, the soil moisture replenishment and the resulting ecological responses were not  
566 negligible for dryland shrubs and the peripheral arid environment (Li et al., 2009). A 2 mm  
567 summer rain might stimulate the activity of soil microbes, resulting in an increase of soil nitrate  
568 in the semi-arid Great Basin at western USA (Cui and Caldwell, 1997), and a brief  
569 decomposition pulse (Austin et al., 2004). The summer rains  $\geq 3$  mm are usually necessary to  
570 elevate rates of carbon fixation in some higher plants at Southern Utah of USA (Schwinning et  
571 al., 2003), or for biological crusts to have a net carbon gain at Eastern Utah of USA (Belnap et  
572 al., 2004). That benefited the formation and maintenance of the “resource island” at the arid  
573 and semi-arid regions (Reynolds et al., 1999). Therefore, a greater stemflow yield and higher  
574 stemflow efficiency at rain pulse and light rains, and a smaller precipitation threshold might  
575 entitle *C. korshinskii* with more available water at the root zone, because stemflow functioned  
576 as an important source of available moisture at dryland ecosystems (Dunkerley, 2000; Yang,  
577 2010; Navar, 2011; Li, et al., 2013). That agreed with the findings of Dong and Zhang (2001)  
578 that *S. psammophila* belonged to the water-spending paradigm from the aspect of leaf water  
579 relations and anatomic features, and the finding of Ai et al. (2015) that *C. korshinskii* belonged  
580 to the water-saving paradigm and had larger drought tolerance ability than *S. psammophila*  
581 from the aspect of root anatomical structure and hydraulic traits.

582

#### 583 **4.3 Effects of leaf traits on stemflow yield**



584 Recent studies at the leaf scale indicated that leaf traits had a significant influence on  
585 stemflow (Carlyle-Mose, 2004; Garcia-Estringana et al., 2010). The factors, such as a relatively  
586 large number of leaves (Levia et al., 2015; Li et al., 2016), a large leaf area (Li et al., 2015), a  
587 high LAI (Liang et al., 2009), a big leaf biomass (Yuan et al., 2016), a scale-like leaf  
588 arrangement (Owens et al., 2006), a small individual leaf area (Sellin et al., 2012), a concave  
589 leaf shape (Xu et al., 2005), a densely veined leaf structure (Xu et al., 2005), an upward leaf  
590 orientation (Crockford and Richardson, 2000), leaf pubescence (Garcia-Estringana et al., 2010),  
591 and the leaf epidermis microrelief (e.g., the non-hydrophobic leaf surface and the grooves  
592 within it) (Roth-Nebelsick et al., 2012), together result in the retention of a large amount of  
593 precipitation in the canopy, supplying water for stemflow yield, and providing a beneficial  
594 morphology that enables the leaves to function as a highly efficient natural water collecting  
595 and channelling system.

596 According to the documenting at *Flora of China* and the field observations in this study  
597 (Chao and Gong, et al., 1999; Liu et al., 2010), *C. korshinskii* had beneficial leaf morphology  
598 for stemflow yield than did *S. psammophila*, owing to a lanceolate and concaved leaf shape, a  
599 pinnate compound leaf arrangement and a densely sericeous pressed pubescence (Fig. 6).  
600 Additionally, experimental measurements indicated that *C. korshinskii* had a larger MTA, LAB,  
601 LNB and LAI (an average of 54.4°, 2509.1 cm<sup>2</sup>, 12479 and 2.4, respectively) and a smaller  
602 ILAB (an average of 21.9 mm<sup>2</sup>) than did *S. psammophila* (an average of 48.5°, 1797.9 cm<sup>2</sup>,  
603 2404, 1.7 and 87.5 mm<sup>2</sup>, respectively). The concave leaf shape, upward leaf orientation (MTA)  
604 and densely veined leaf structure (ILAB) (Xu et al., 2005) provided stronger leaf structural  
605 support in *C. korshinskii* for the interception and transportation of precipitation, particularly  
606 during highly intense rains. Therefore, in addition to the leaf morphology, *C. korshinskii* was  
607 also equipped with more beneficial leaf structural features for stemflow yield.

608  
609 Fig. 6. Comparison of leaf morphologies of *C. korshinskii* and *S. psammophila*.

610

611 A controlled experiment was conducted for the foliated and manually defoliated *C.*  
612 *korshinskii* and *S. psammophila* simultaneously at the 2015 rainy season. Compared with the  
613 previous studies comparing stemflow yield between the leafed period (summer and growing  
614 season) and the leafless period (winter and dormant season) (Dolman, 1987; Masukata et al.,  
615 1990; Neal et al., 1993; Martinez-Meza and Whitford, 1996; Deguchi et al., 2006; Liang et al.,  
616 2009; Muzylo et al., 2012), we improved this method and guaranteed the identical  
617 meteorological conditions and stand conditions, which was believed to provide more  
618 convincing evidence for leaf's effect on stemflow yield.

619 However, contradictory results was reached in this study.  $SF_b$  of the foliated *C. korshinskii*  
620 was 2.5-fold larger than did the defoliated *C. korshinskii* on average (Table 3), which seemed  
621 to demonstrate an overall positive effects of leaves affecting stemflow yield. But, it  
622 contradicted with the average 1.3-fold larger  $SF_b$  of the defoliated *S. psammophila* than did the  
623 foliated *S. psammophila*. Despite of the identical stand and meteorological conditions, the  
624 changing interception area for raindrops was not taken into account as did the previous studies,  
625 which was mainly represented by leaf area and stem surface area at the foliated and defoliated  
626 state, respectively. For comparing the inter-specific  $SF_b$ , the normalized area indexes of SSAL  
627 and SSAS was analysed in this study. At the foliated state, a 1.4-fold larger SSAL of the *C.*  
628 *korshinskii* was corresponded to a 1.6-fold larger  $SF_b$  than that of *S. psammophila*, respectively.  
629 But at the defoliated state, a 2.0-fold larger SSAS of *S. psammophila* corresponded to a 1.8-  
630 fold larger  $SF_b$  than that of *C. korshinskii*, respectively (Table 1 and Table 3). Indeed, it greatly  
631 underestimated the real stem surface area of individual branches by ignoring the collateral  
632 stems and computing SA with the surface area of the main stem, which was assumed as a  
633 standard cone. However, the positive relations of  $SF_b$  with SSAL and SSAS at different leaf  
634 states might shed light on the long-standing discussion about leaf's effects on stemflow.

635 Although an identical meteorological and stand conditions and similar plant traits were  
636 guaranteed, the experiment by comparing stemflow yield between the foliated and defoliated  
637 periods might provide no feasible evidence for leaf's effects (positive, negative or neglectable)  
638 affecting stemflow yield, if the newly exposed branch surface at the defoliated period and the  
639 resulting rainfall intercepting effect were not considered.

640

## 641 **5 Conclusions**

642 Compared with *S. psammophila*, *C. korshinskii* produced a larger amount of stemflow  
643 more efficiently during different-sized rains; an average 1.9, 1.3, 1.4, 1.6 and 2.5-fold larger in  
644 *C. korshinskii* was observed for the branch stemflow volume ( $SF_b$ ), the shrub stemflow depth  
645 ( $SF_d$ ), the shrub stemflow percentage (SF%), the stemflow productivity (SFP) and the stemflow  
646 funnelling ratio (FR), respectively. The inter-specific differences in stemflow yield ( $SF_b$ ,  $SF_d$   
647 and SF%) and the production efficiency (SFP and FR) were maximized for the 5–10 mm  
648 branches and during rains  $\leq 2$  mm. The smaller threshold precipitation (0.9 mm for *C.*  
649 *korshinskii* vs. 2.1 mm for *S. psammophila*), and the beneficial leaf traits might be partly  
650 responsible for the superior stemflow yield and efficiency in *C. korshinskii*.

651 Precipitation amount had the largest influence on both stemflow yield and efficiency for  
652 the two shrub species. BA was the most influential plant trait on FR. For  $SF_b$ , stem biomass  
653 and leaf biomass were the most influential plant traits in *C. korshinskii* and *S. psammophila*,  
654 respectively. But for SFP, leaf traits (the individual leaf area) and branch traits (branch size and  
655 biomass allocation pattern) had a larger influence in these two shrub species during smaller  
656 rains  $\leq 10$  mm and heavier rains  $> 15$  mm, respectively.

657 By comparing  $SF_b$  between the foliated and manually defoliated shrubs simultaneously at  
658 the 2015 rainy season, a contradiction was noted: the larger stemflow yield of *C. korshinskii* at  
659 the foliated state, but the larger stemflow yield of *S. psammophila* at the defoliated state. That

660 corresponded to the inter-specific difference of the specific surface area representing by leaves  
661 (SSAL) and stems (SSAS) at different leaf states, respectively. It shed lights on the feasibility  
662 of experiments by comparing stemflow yield between the foliated and defoliated periods,  
663 which might provide no convincing evidence for leaf's effects (positive, negative or  
664 neglectable) affecting stemflow yield, if the newly exposed branch surface at the defoliated  
665 period and the resulting rainfall intercepting effects were not considered.

666

667 *Acknowledgments.* This research was funded in part by the National Natural Science  
668 Foundation of China (No. 41390462), the National Key Research and Development Program  
669 (No. 2016YFC0501602) and the Youth Innovation Promotion Association CAS (No. 2016040).  
670 We are grateful to Mengyu Wang, Dongyang Zhao, Meixia Mi and Hongmin Hao for field  
671 assistant. Special thanks were given to the Shenmu Erosion and Environment Research Station  
672 for experiment support to this research. We thank Prof. David Dunkerley and another  
673 anonymous reviewer for their comments which greatly improve the quality of this manuscript.

674

## 675 **References**

- 676 Ai, S. S., Li, Y. Y., Chen, J. C., and Chen, W. Y.: Root anatomical structure and hydraulic traits  
677 of three typical shrubs on the sandy lands of northern Shaanxi Province, China, *Chinese J.*  
678 *Appl. Ecol.*, 26, 3277–3284, 2015 (in Chinese with English abstract).
- 679 Allaby, M.: *A Dictionary of Ecology*. 4 ed. Oxford University Press, 2010.
- 680 Andr e F., Jonard, M., and Ponette, Q.: Influence of species and rain event characteristics on  
681 stemflow volume in a temperate mixed oak-beech stand, *Hydrol. Process.*, 22, 4455–4466,  
682 2008.
- 683 Andersson, T.: Influence of stemflow and throughfall from common oak (*Quercus robur*) on  
684 soil chemistry and vegetation patterns, *Can. J. Forest Res.*, 21, 917–924, 1991.

685 Austin, A. T., Yahdjian, L., Stark, J. M., Belnap, J., Porporato, A., Norton, U., Ravetta, D. A.  
686 and Schaeffer, S. M.: Water pulses and biogeochemical cycles in arid and semiarid  
687 ecosystems, *Oecologia*, 141, 221–235, 2004.

688 Belmonte Serrato, F., and Romero Diaz, A.: A simple technique for measuring rainfall  
689 interception by small shrub: “interception flow collection box”, *Hydrol. Process.*, 12, 471–  
690 481, 1998.

691 Belnap, J., Philips, S. L. and Miller, M. E.: Response of desert biological soil crusts to  
692 alterations in precipitation frequency, *Oecologia*, 141, 306–316, 2004.

693 Brady, D. J., Wenzel, C. L., Fillery, I. R. P. and Gregory, P. J.: Root growth and nitrate uptake  
694 by wheat (*Triticum aestivum* L.) following wetting of dry surface soil, *J. Exp. Bot.*, 46, 557–  
695 564, 1995.

696 Carlyle-Moses, D. E.: Throughfall, stemflow, and canopy interception loss fluxes in a semi-  
697 arid Sierra Madre Oriental matorral community, *J. Arid Environ.*, 58, 181–202, 2004.

698 Carlyle-Moses, D. E., and Price, A. G.: Growing-season stemflow production within a  
699 deciduous forest of southern Ontario, *Hydrol. Process.*, 20, 3651–3663, 2006.

700 Carlyle-Moses, D. E., and Schooling, J.: Tree traits and meteorological factors influencing the  
701 initiation and rate of stemflow from isolated deciduous trees, *Hydrol. Process.*, 29, 4083–  
702 4099, 2015.

703 Clements, J. R.: Stemflow in a Multi-storied Aspen Community, *Can. J. Forest. Res.*, 160–165,  
704 1972.

705 Chao P. N., and Gong G.T.: *Salix* (*Salicaceae*), in: *Flora of China*, edited by Wu Z. Y., Raven  
706 P. H. and Hong D. Y., Science Press, Beijing and Missouri Botanical Garden Press, St. Louis,  
707 4, 162–274, 1999.

708 Crockford, R. H., and Richardson, D. P.: Partitioning of rainfall into throughfall, stemflow and  
709 interception: effect of forest type, ground cover and climate, *Hydrol. Process.*, 14, 2903–

710 2920, 2000.

711 Cui, M. Y. and Caldwell, M. M.: A large ephemeral release of nitrogen upon wetting of dry soil  
712 and corresponding root responses in the field, *Plant Soil*, 291–299, 1997.

713 Deguchi, A., Hattori, S. and Park, H. T.: The influence of seasonal changes in canopy structure  
714 on interception loss: Application of the revised Gash model, *J. Hydrol.*, 318, 80–102, 2006.

715 Devitt, D. H., and Smith, S. D.: Root channel macropores enhance downward movement of  
716 water in a Mojave Desert ecosystem, *J. Arid Environ.*, 50, 1, 99–108, 2002.

717 Dolman, A. J.: Summer and winter rainfall interception in an oak forest. Predictions with an  
718 analytical and a numerical simulation model, *J. Hydrol.*, 90, 1–9, 1987.

719 Dong, S. R., Guo, J. T. and Man, R. Z.: The throughfall, stemflow and interception loss of the  
720 *Pinus tabulaeformis* plantations at northern China, *J. Beijing Forestry Univ.*, 9, 58–68, 1987  
721 (in Chinese).

722 Dong, X. J. and Zhang, X. S.: Some observations of the adaptations of sandy shrubs to the arid  
723 environment in the Mu Us Sandland: leaf water relations and anatomic features, *J. Arid  
724 Environ.*, 48, 41–48, 2001.

725 Dunkerley, D.: Measuring interception loss and canopy storage in dryland vegetation: a brief  
726 review and evaluation of available research strategies, *Hydrol. Process.*, 14, 669–678, 2000.

727 Dunkerley, D.: Stemflow production and intrastorm rainfall intensity variation: an  
728 experimental analysis using laboratory rainfall simulation, *Earth Surf. Proc. Land*, 39, 1741–  
729 1752, 2014a.

730 Dunkerley, D.: Stemflow on the woody parts of plants: dependence on rainfall intensity and  
731 event profile from laboratory simulations, *Hydrol. Process.*, 28, 5469–5482, 2014b.

732 Firn, R.: Plant Intelligence: an Alternative Point of View. *Annals of Botany*, 93, 4, 345–351,  
733 2004.

734 Garcia-Estringana, P., Alonso-Blazquez, N., and Alegre, J.: Water storage capacity, stemflow

735 and water funneling in Mediterranean shrubs, *J. Hydrol.*, 389, 363–372, 2010.

736 Giacomini, A., and Trucchi, P.: Rainfall interception in a beech coppice (Acquerino, Italy), *J.*  
737 *Hydrol.*, 137, 141–147, 1992.

738 Groisman, P. Y., and Legates, D. R.: The accuracy of United States precipitation data, *B. Am.*  
739 *Meteorol. Soc.*, 75, 215–227, 1994.

740 Herwitz, S. R.: Infiltration-excess caused by Stemflow in a cyclone-prone tropical rainforest,  
741 *Earth Surf. Proc. Land*, 11, 401–412, 1986.

742 Herwitz, S. R.: Rainfall totals in relation to solute inputs along an exceptionally wet altitudinal  
743 transect, *Catena*, 14, 25–30, 1987.

744 Honda, E. A., Mendonça, A. H., and Durigan, G.: Factors affecting the stemflow of trees in the  
745 Brazilian cerrado, *Ecohydrology*, 8, 1351–1362, 2015.

746 Jackson, R. B. and Caldwell, M. M.: Kinetic responses of *Pseudoroegneria* roots to localized  
747 soil enrichment, *Plant Soil*, 138, 231–238, 1991.

748 Jasper, D. A., Abbott, L. K. and Robson, A. D.: The survival of infective hyphae of vesicular–  
749 arbuscular mycorrhizal fungi in dry soil: an interaction with sporulation, *New Phytol.*, 124,  
750 473–479, 1993.

751 Jia, X. X., Shao, M. A., Wei, X. R., Horton, R., and Li, X. Z.: Estimating total net primary  
752 productivity of managed grasslands by a state-space modeling approach in a small  
753 catchment on the Loess Plateau, China, *Geoderma*, 160, 281–291, 2011.

754 Jia, X. X., Shao, M. A., Wei, X. R., and Wang, Y. Q.: Hillslope scale temporal stability of soil  
755 water storage in diverse soil layers, *J. Hydrol.*, 498, 254–264, 2013.

756 Jian, S. Q., Zhao, C. Y., Fang, S. M., and Kai, Y. U.: Characteristics of *Caragana korshinskii*  
757 and *Hippophae rhamnoides* stemflow and their significance in soil moisture enhancement  
758 in Loess Plateau, China, *J. Arid Land.*, 6, 105–116, 2014.

759 Johnson, M. S., and Lehmann, J.: Double-funneling of trees: Stemflow and root-induced

760 preferential flow, *Ecoscience*, 13, 324–333, 2006.

761 Jonard, M., Andre, F., and Ponette, Q.: Modeling leaf dispersal in mixed hardwood forests  
762 using a ballistic approach, *Ecology*, 87, 2306–2318, 2006.

763 Levia, D. F., and Frost, E. E.: A review and evaluation of stemflow literature in the hydrologic  
764 and biogeochemical cycles of forested and agricultural ecosystems, *J. Hydrol.*, 274, 1–29,  
765 2003.

766 Levia, D. F., and Herwitz, S. R.: Interspecific variation of bark water storage capacity of three  
767 deciduous tree species in relation to stemflow yield and solute flux to forest soils, *Catena*,  
768 64, 117–137, 2005.

769 Levia, D. F., Michalzik, B., N ähe, K., Bischoff, S., Richter, S., and Legates, D. R.: Differential  
770 stemflow yield from European beech saplings: the role of individual canopy structure  
771 metrics, *Hydrol. Process.*, 29, 43–51, 2015.

772 Li, L., Li, X. Y., Zhang, S. Y., Jiang, Z. Y., Zheng, X. R., Hu, X., and Huang, Y. M.: Stemflow  
773 and its controlling factors in the subshrub *Artemisia ordosica* during two contrasting growth  
774 stages in the Mu Us sandy land of northern China, *Hydrol. Res.*, 47, 409–418, 2015.

775 Li, X., Xiao, Q., Niu, J., Dymond, S., van Doorn, N. S., Yu, X., Xie, B., Lv, X., Zhang, K., and  
776 Li, J.: Process-based rainfall interception by small trees in Northern China: The effect of  
777 rainfall traits and crown structure characteristics, *Agr. Forest Meteorol.*, 218–219, 65–73,  
778 2016.

779 Li, X. Y.: Hydrology and Biogeochemistry of Semiarid and Arid Regions, in: *Forest Hydrology  
780 and Biogeochemistry*, edited by: Levia, D. F., Carlyle-Moses, D. and Tanaka, T., Springer,  
781 Netherlands, 13, 285–299, 2011.

782 Li, X. Y., Hu, X., Zhang, Z. H., Peng, H. Y., Zhang, S. Y., Li, G. Y., Li, L. and Ma, Y. J.: Shrub  
783 hydropedology: preferential water availability to deep soil layer, *Vadose Zone J.*, 12, 2013.

784 Li, X. Y., Liu, L. Y., Gao, S. Y., Ma, Y. J., and Yang, Z. P.: Stemflow in three shrubs and its



785 effect on soil water enhancement in semiarid loess region of China, *Agr. Forest Meteorol.*,  
786 148, 1501–1507, 2008.

787 Li, X. Y., Yang, Z. P., Li, Y. T., and Lin, H.: Connecting ecohydrology and hydrogeology in  
788 desert shrubs: stemflow as a source of preferential flow in soils, *Hydrol. Earth Syst. Sci.*, 13,  
789 1133–1144, 2009.

790 Liang, W. L., Kosugi, K. I., and Mizuyama, T.: Characteristics of stemflow for tall *Stewartia*  
791 (*Stewartia monadelphica*) growing on a hillslope, *J. Hydrol.*, 378, 168–178, 2009.

792 Liu Y. X., Chang Z. Y. and Gennady. P. Y.: *Caragana (Fabaceae)*, in: *Flora of China*, edited  
793 by: Wu Z. Y., Raven P. H. and Hong D. Y., Science Press, Beijing and Missouri Botanical  
794 Garden Press, St. Louis, 10, 528–545, 2010.

795 Llorens, P., and Domingo, F.: Rainfall partitioning by vegetation under Mediterranean  
796 conditions. A review of studies in Europe, *J. Hydrol.*, 335, 37–54, 2007.

797 Ma, C. C., Gao, Y. B., Guo, H. Y., Wang, J. L., Wu, J. B., and Xu, J. S.: Physiological  
798 adaptations of four dominant *Caragana* species in the desert region of the Inner Mongolia  
799 Plateau, *J. Arid Environ.*, 72, 247–254, 2008.

800 Ma, C. C., Gao, Y. B., Wang, J. L., and Guo, H. Y.: Ecological adaptation of *Caragana opulens*  
801 on the Inner Mongolia Plateau: photosynthesis and water metabolism, *Chinese J. Plant Ecol.*,  
802 28, 305–312, 2004 (in Chinese with English abstract).

803 Martinez-Meza, E., and Whitford, W. G.: Stemflow, throughfall and channelization of  
804 stemflow by roots in three Chihuahuan desert shrubs, *J. Arid Environ.*, 32, 271–287, 1996.

805 Mauchamp, A., and Janeau, J. L.: Water funnelling by the crown of *Flourensia cernua*, a  
806 Chihuahuan Desert shrub, *J. Arid Environ.*, 25, 299–306, 1993.

807 Masukata, H., Ando, M. and Ogawa, H.: Throughfall, stemflow and interception of rainwater  
808 in an evergreen broadleaved forest, *Ecol. Res.*, 5, 303–316, 1990.

809 McClain, M. E., Boyer, E. W., Dent, C. L., Gergel, S. E., Grimm, N. B., Groffman, P. M., Hart,

810 S. C., Harvey, J. W., Johnston, C. A., and Mayorga, E.: Biogeochemical Hot Spots and Hot  
811 Moments at the Interface of Terrestrial and Aquatic Ecosystems, *Ecosystems*, 6, 301–312,  
812 2003.

813 Murakami, S.: Abrupt changes in annual stemflow with growth in a young stand of Japanese  
814 cypress, *Hydrol. Res. Lett.*, 3, 32–35, 2009.

815 Muzyło, A., Llorens, P., and Domingo, F.: Rainfall partitioning in a deciduous forest plot in  
816 leafed and leafless periods, *Ecohydrology*, 5, 759–767, 2012.

817 Návar, J.: Stemflow variation in Mexico’s northeastern forest communities: Its contribution to  
818 soil moisture content and aquifer recharge, *J. Hydrol.*, 408, 35–42, 2011.

819 Návar, J., and Bryan, R.: Interception loss and rainfall redistribution by three semi-arid growing  
820 shrubs in northeastern Mexico, *J. Hydrol.*, 115, 51–63, 1990.

821 Neal, C., Robson, A. J., Bhardwaj, C. L., Conway, T., Jeffery, H. A., Neal, M., Ryland, G. P.,  
822 Smith, C. J., and Walls, J.: Relationships between precipitation, stemflow and throughfall  
823 for a lowland beech plantation, Black Wood, Hampshire, southern England: findings on  
824 interception at a forest edge and the effects of storm damage, *J. Hydrol.*, 146, 221–233, 1993.

825 O’Brien, R. M.: A Caution Regarding Rules of Thumb for Variance Inflation Factors, *Qual.*  
826 *Quant.*, 41, 673–690, 2007.

827 Owens, M. K., Lyons, R. K., and Alejandro, C. L.: Rainfall partitioning within semiarid juniper  
828 communities: effects of event size and canopy cover, *Hydrol. Process.*, 20, 3179–3189, 2006.

829 Pressland, A.: Rainfall partitioning by an arid woodland (*Acacia aneura* F. Muell.) in south-  
830 western Queensland, *Aust. J. Bot.*, 21, 235–245, 1973.

831 Pypker, T. G., Levia, D. F., Staelens, J., and Van Stan II, J. T.: Canopy structure in relation to  
832 hydrological and biogeochemical fluxes, in: *Forest Hydrology and Biogeochemistry*, edited  
833 by: Springer, 371–388, 2011.

834 Rango, A., Tartowski, S. L., Laliberte, A., Wainwright, J., and Parsons, A.: Islands of

835 hydrologically enhanced biotic productivity in natural and managed arid ecosystems, *J. Arid*  
836 *Environ.*, 65, 235–252, 2006.

837 Reynolds, J. F., Virginia, R. A., Kemp, P. R., de Soyza, A. G., and Tremmel, D. C.: Impact of  
838 drought on desert shrubs: effects of seasonality and degree of resource island development,  
839 *Ecol. Monogr.*, 69, 69–106, 1999.

840 Roth-Nebelsick, A., Ebner, M., Miranda, T., Gottschalk, V., Voigt, D., Gorb, S., Stegmaier, T.,  
841 Sarsour, J., Linke, M., and Konrad, W.: Leaf surface structures enable the endemic Namib  
842 desert grass *Stipagrostis sabulicola* to irrigate itself with fog water, *J. R. Soc. Interface.*, 9,  
843 1965–1974, 2012.

844 Schwinning, S. and Sala, O. E.: Hierarchy of responses to resource pulses in and and semi-arid  
845 ecosystems, *Oecologia*, 141, 211–220, 2004.

846 Schwinning, S., Starr, B. and Ehleringer, J. R.: Dominant cold desert plants do not partition  
847 warm season precipitation by event size, *Oecologia*, 136, 250–260, 2003.

848 Sellin, A., Öunapuu, E., Kaurilind, E., and Alber, M.: Size-dependent variability of leaf and  
849 shoot hydraulic conductance in silver birch, *Trees*, 26, 821–831, 2012.

850 Siegert, C. M., and Levia, D. F.: Seasonal and meteorological effects on differential stemflow  
851 funneling ratios for two deciduous tree species, *J. Hydrol.*, 519, Part A, 446–454, 2014.

852 Siles, P., Harmand, J.-M., and Vaast, P.: Effects of *Inga densiflora* on the microclimate of coffee  
853 (*Coffea arabica L.*) and overall biomass under optimal growing conditions in Costa Rica,  
854 *Agroforest Syst.*, 78, 269–286, 2010a.

855 Siles, P., Vaast, P., Dreyer, E., and Harmand, J.-M.: Rainfall partitioning into throughfall,  
856 stemflow and interception loss in a coffee (*Coffea arabica L.*) monoculture compared to an  
857 agroforestry system with *Inga densiflora*, *J. Hydrol.*, 395, 39–48, 2010b.

858 Sponseller, R. A.: Precipitation pulses and soil CO<sub>2</sub> flux in a Sonoran Desert ecosystem, *Global*  
859 *Change Biol.*, 13, 426–436, 2007.

860 Stephenson, N. L., Das, A. J., Condit, R., Russo, S. E., Baker, P. J., Beckman, N. G., Coomes,  
861 D. A., Lines, E. R., Morris, W. K., Ruger, N., Alvarez, E., Blundo, C., Bunyavejchewin, S.,  
862 Chuyong, G., Davies, S. J., Duque, A., Ewango, C. N., Flores, O., Franklin, J. F., Grau, H.  
863 R., Hao, Z., Harmon, M. E., Hubbell, S. P., Kenfack, D., Lin, Y., Makana, J. R., Malizia, A.,  
864 Malizia, L. R., Pabst, R. J., Pongpattananurak, N., Su, S. H., Sun, I. F., Tan, S., Thomas, D.,  
865 van Mantgem, P. J., Wang, X., Wiser, S. K., and Zavala, M. A.: Rate of tree carbon  
866 accumulation increases continuously with tree size, *Nature*, 507, 90–93, 2014.

867 Van Stan II, J., Van Stan, J. H., and Levia Jr., D. F.: Meteorological influences on stemflow  
868 generation across diameter size classes of two morphologically distinct deciduous species,  
869 *Int. J. Biometeorol.*, 58, 2059–2069, 2014.

870 Wang, X. P., Zhang, Y. F., Wang, Z. N., Pan, Y. X., Hu, R., Li, X. J., and Zhang, H.: Influence  
871 of shrub canopy morphology and rainfall characteristics on stemflow within a revegetated  
872 sand dune in the Tengger Desert, NW China, *Hydrol. Process.*, 27, 1501–1509, 2013.

873 Wang, X. P., Wang, Z. N., Berndtsson, R., Zhang, Y. F., and Pan, Y. X.: Desert shrub stemflow  
874 and its significance in soil moisture replenishment, *Hydrol. Earth Syst. Sci.*, 15, 561–567,  
875 2011.

876 Whitford, W. G., Anderson, J., and Rice, P. M.: Stemflow contribution to the ‘fertile island’  
877 effect in creosotebush, *Larrea tridentata*, *J. Arid Environ.*, 35, 451–457, 1997.

878 Xu, X., Wang, Q., and Hirata, E.: Precipitation partitioning and related nutrient fluxes in a  
879 subtropical forest in Okinawa, Japan, *Ann. Forest Sci.*, 62, 245–252, 2005.

880 Yang, Z., Li, X., Liu, L., Wu, J., Hasi, E., and Sun, Y.: Characteristics of stemflow for sand-  
881 fixed shrubs in Mu Us sandy land, Northwest China, *Chin. Sci. Bull.*, 53, 2207–2214, 2008.

882 Yang, Z. P.: Rainfall partitioning process and its effects on soil hydrological processes for sand-  
883 fixed shrubs in Mu Us sandland, northwest China, D. Sc., Beijing Normal University, 2010.

884 Yuan, C., Gao, G. Y., and Fu, B. J.: Stemflow of a xerophytic shrub (*Salix psammophila*) in

885 northern China: Implication for beneficial branch architecture to produce stemflow, J.  
886 Hydrol., 539, 577–588, 2016.

887 Zhang, S. Y., Li, X. Y., Li, L., Huang, Y. M., Zhao, G. Q., and Chen, H. Y.: The measurement  
888 and modelling of stemflow in an alpine *Myricaria squamosa* community, Hydrol. Process.,  
889 29, 889–899, 2015.

890 Zhang, Z. S., Zhao, Y., Li, X. R., Huang, L., and Tan, H. J.: Gross rainfall amount and maximum  
891 rainfall intensity in 60-minute influence on interception loss of shrubs: a 10-year observation  
892 in the Tengger Desert, Sci. Rep., 6, 26030, 2016.

893 Zhao, P. P., Shao, M. A., and Wang, T. J.: Spatial distributions of soil surface-layer saturated  
894 hydraulic conductivity and controlling factors on dam farmlands, Water Resour. Manag., 24,  
895 2247–2266, 2010.

896 Zhu, Y. J., and Shao, M. A.: Variability and pattern of surface moisture on a small-scale  
897 hillslope in Liudaogou catchment on the northern Loess Plateau of China, Geoderma, 147,  
898 185–191, 2008.

899 **Table captions**

900

901 **Table 1.** Comparison of leaf traits, branch morphology and biomass indicators of *C. korshinskii*  
902 and *S. psammophila*.

903

904 **Table 2.** Comparison of stemflow yield ( $SF_b$ ,  $SF_d$  and  $SF\%$ ) between the foliated *C. korshinskii*  
905 and *S. psammophila*.

906

907 **Table 3.** Comparison of stemflow yield ( $SF_b$ ) of the foliated and manually defoliated *C.*  
908 *korshinskii* and *S. psammophila*.

909

910 **Table 4.** Comparison of stemflow productivity (SFP) between the foliated *C. korshinskii* and  
911 *S. psammophila*.

912

913 **Table 5.** Comparison of the funnelling ratio (FR) between the foliated *C. korshinskii* and *S.*  
914 *psammophila*.

**Table 1.** Comparison of leaf traits, branch morphology and biomass indicators of *C. korshinskii* and *S. psammophila*.

| Plant traits       | <i>C. korshinskii</i> (categorized by BD, mm) |        |        |        |           | <i>S. psammophila</i> (categorized by BD, mm) |       |        |        |           |               |
|--------------------|-----------------------------------------------|--------|--------|--------|-----------|-----------------------------------------------|-------|--------|--------|-----------|---------------|
|                    | 5–10                                          | 10–15  | 15–18  | >18    | Avg. (BD) | 5–10                                          | 10–15 | 15–18  | >18    | Avg. (BD) |               |
| Leaf traits        | LAB (cm <sup>2</sup> )                        | 1202.7 | 2394.5 | 3791.2 | 5195.2    | 2509.1±1355.3                                 | 499.2 | 1317.7 | 2515.2 | 3533.6    | 1797.9±1118.0 |
|                    | LNB                                           | 4787   | 11326  | 20071  | 29802     | 12479±8409                                    | 392   | 1456   | 3478   | 5551      | 2404±1922     |
|                    | ILAB (mm <sup>2</sup> )                       | 25.4   | 21.3   | 18.9   | 17.5      | 21.9±3.0                                      | 135.1 | 93.1   | 72.6   | 64.3      | 93.1±27.8     |
|                    | SSAL (cm <sup>2</sup> g <sup>-1</sup> )       | 22.8   | 17.3   | 14.3   | 12.6      | 18.2±0.5                                      | 18.4  | 13.6   | 10.8   | 8.6       | 12.7±0.4      |
|                    | SSAS (cm <sup>2</sup> g <sup>-1</sup> )       | 3.4    | 2.3    | 1.9    | 1.6       | 2.5±0.1                                       | 10.4  | 5.4    | 3.3    | 1.9       | 5.1±0.3       |
| Branch morphology  | BD (mm)                                       | 8.17   | 12.49  | 16.61  | 20.16     | 12.48±4.16                                    | 7.91  | 12.48  | 16.92  | 19.76     | 13.73±4.36    |
|                    | BL (cm)                                       | 137.9  | 160.3  | 195.9  | 200.7     | 161.5±35.0                                    | 212.5 | 260.2  | 290.4  | 320.1     | 267.3±49.7    |
|                    | BA (°)                                        | 63     | 56     | 63     | 64        | 60±18                                         | 64    | 63     | 51     | 60        | 60±20         |
|                    | SA (cm <sup>2</sup> )                         | 176.8  | 314.1  | 508.6  | 630.7     | 326.1±20.6                                    | 268.0 | 514.1  | 827.7  | 1312.3    | 711.0±38.9    |
| Biomass indicators | BML (g)                                       | 13.9   | 19.0   | 30.2   | 41.4      | 19.9±10.8                                     | 5.4   | 18.0   | 40.0   | 61.3      | 27.9±20.7     |
|                    | BMS (g)                                       | 62.9   | 121.4  | 236.4  | 375.8     | 141.1±110.8                                   | 23.0  | 81.4   | 188.5  | 295.5     | 130.7±101.4   |
|                    | PBMS (%)                                      | 82.0   | 86.3   | 88.7   | 90.0      | 85.6±3.1                                      | 80.8  | 81.8   | 82.5   | 82.8      | 81.9±0.8      |

916

917

918

919

Note: LAB and LNB are leaf area and number of branch, respectively. ILAB is individual leaf area of branch. SSAL and SSAS are the specific surface area representing with LAB and SA, respectively. BD, BL and BA are average branch basal diameter, length and angle, respectively. SA is the surface area of stems. BML and BMS are biomass of leaves and stems, respectively. PBMS is the percentage of stem biomass to that of branch. The average values mentioned above are expressed as the means ±SE.

**Table 2.** Comparison of stemflow yield ( $SF_b$ ,  $SF_d$  and  $SF\%$ ) between the foliated *C. korshinskii* and *S. psammophila*.

| Intra- and inter-specific differences                                                  | Stemflow indicators | BD categories (mm) | Precipitation categories (mm) |       |       |       |        |        | Avg.(P) |
|----------------------------------------------------------------------------------------|---------------------|--------------------|-------------------------------|-------|-------|-------|--------|--------|---------|
|                                                                                        |                     |                    | ≤2                            | 2–5   | 5–10  | 10–15 | 15–20  | >20    |         |
| Intra-specific differences in <i>C. korshinskii</i> (CK)                               | $SF_b$ (mL)         | 5–10               | 10.7                          | 29.8  | 73.5  | 109.9 | 227.6  | 306.1  | 119.0   |
|                                                                                        |                     | 10–15              | 26.0                          | 64.0  | 166.1 | 236.0 | 478.6  | 689.7  | 262.4   |
|                                                                                        |                     | 15–18              | 44.3                          | 103.3 | 279.9 | 416.6 | 826.0  | 1272.3 | 464.5   |
|                                                                                        |                     | >18                | 69.5                          | 145.4 | 424.4 | 631.4 | 1226.9 | 1811.7 | 679.9   |
|                                                                                        |                     | Avg.(BD)           | 28.4                          | 67.3  | 180.6 | 264.6 | 529.2  | 771.4  | 290.6   |
|                                                                                        | $SF_d$ (mm)         | N/A                | 0.1                           | 0.2   | 0.6   | 0.9   | 1.9    | 2.6    | 1.0     |
| $SF\%$ (%)                                                                             | N/A                 | 5.8                | 6.6                           | 8.8   | 7.5   | 10.1  | 8.9    | 8.0    |         |
| Intra-specific differences in <i>S. psammophila</i> (SP)                               | $SF_b$ (mL)         | 5–10               | 2.8                           | 8.9   | 28.8  | 47.2  | 66.5   | 120.0  | 43.0    |
|                                                                                        |                     | 10–15              | 7.6                           | 23.2  | 76.6  | 134.6 | 188.3  | 353.5  | 121.8   |
|                                                                                        |                     | 15–18              | 12.0                          | 35.9  | 121.6 | 223.4 | 319.4  | 592.6  | 201.5   |
|                                                                                        |                     | >18                | 16.2                          | 52.3  | 165.5 | 289.2 | 439.6  | 860.4  | 281.8   |
|                                                                                        |                     | Avg.(BD)           | 9.0                           | 28.0  | 91.6  | 162.2 | 234.8  | 444.3  | 150.3   |
|                                                                                        | $SF_d$ (mm)         | N/A                | <0.1                          | 0.1   | 0.5   | 0.9   | 1.3    | 2.2    | 0.8     |
| $SF\%$ (%)                                                                             | N/A                 | 0.7                | 3.0                           | 6.1   | 6.8   | 7.2   | 7.9    | 5.5    |         |
| Inter-specific differences<br>(the ratio of the stemflow yield<br>of CK to that of SP) | $SF_b$              | 5–10               | 3.8                           | 3.3   | 2.6   | 2.3   | 3.4    | 2.6    | 2.8     |
|                                                                                        |                     | 10–15              | 3.4                           | 2.8   | 2.2   | 1.8   | 2.5    | 2.0    | 2.2     |
|                                                                                        |                     | 15–18              | 3.7                           | 2.9   | 2.3   | 1.9   | 2.6    | 2.2    | 2.3     |
|                                                                                        |                     | >18                | 4.3                           | 2.8   | 2.6   | 2.2   | 2.8    | 2.1    | 2.4     |
|                                                                                        |                     | Avg.(BD)           | 3.2                           | 2.4   | 2.0   | 1.6   | 2.3    | 1.7    | 1.9     |
|                                                                                        | $SF_d$              | N/A                | 8.5                           | 2.2   | 1.3   | 1.0   | 1.5    | 1.2    | 1.3     |
| $SF\%$                                                                                 | N/A                 | 8.3                | 2.2                           | 1.4   | 1.1   | 1.4   | 1.1    | 1.4    |         |

Note: BD is the branch basal diameter; P is the precipitation amount; CK and SP are the abbreviations of *C. korshinskii* and *S. psammophila*, respectively.



**Table 3.** Comparison of stemflow yield ( $SF_b$ ) of the foliated and manually defoliated *C. korshinskii* and *S. psammophila*.

| Leaf states                  | BD categories (mm) | <i>C. korshinskii</i>              |       |       |       |        |          | <i>S. psammophila</i>              |       |       |       |       |          | $SF_b(CK)/SF_b(SP)$       |     |     |     |      |          |
|------------------------------|--------------------|------------------------------------|-------|-------|-------|--------|----------|------------------------------------|-------|-------|-------|-------|----------|---------------------------|-----|-----|-----|------|----------|
|                              |                    | Incident precipitation amount (mm) |       |       |       |        | Avg. (P) | Incident precipitation amount (mm) |       |       |       |       | Avg. (P) | Precipitation amount (mm) |     |     |     |      | Avg. (P) |
|                              |                    | 1.7                                | 6.7   | 6.8   | 7.6   | 22.6   |          | 1.7                                | 6.7   | 6.8   | 7.6   | 22.6  |          | 1.7                       | 6.7 | 6.8 | 7.6 | 22.6 |          |
| Foliated                     | 5–10               | 12.9                               | 85.1  | 93.0  | 77.7  | 254.8  | 104.7    | 3.6                                | 32.1  | 55.1  | 40.6  | 140.7 | 46.9     | 3.6                       | 2.7 | 1.7 | 1.9 | 1.8  | 2.2      |
|                              | 10–15              | 28.6                               | 197.0 | 274.6 | 190.1 | 694.3  | 276.9    | 10.1                               | 67.7  | 141.5 | 119.6 | 351.4 | 130.8    | 2.8                       | 2.9 | 1.9 | 1.6 | 2.0  | 2.1      |
|                              | >15                | 51.0                               | 382.3 | 616.0 | 370.7 | 1225.7 | 529.1    | 16.6                               | 112.5 | 279.9 | 272.9 | 721.3 | 279.6    | 3.1                       | 3.4 | 2.2 | 1.4 | 1.7  | 1.9      |
|                              | Avg.(BD)           | 30.2                               | 221.5 | 317.5 | 211.4 | 708.8  | 297.9    | 11.9                               | 82.4  | 191.6 | 178.6 | 489.6 | 186.6    | 2.5                       | 2.7 | 1.7 | 1.2 | 1.4  | 1.6      |
| Defoliated                   | 5–10               | 17.3                               | 87.3  | 116.7 | 85.7  | 264.7  | 114.3    | 4.8                                | 22.3  | 46.7  | 43.5  | 152.7 | 52.4     | 3.6                       | 3.9 | 2.5 | 2.0 | 1.7  | 2.2      |
|                              | 10–15              | 11.0                               | 50.0  | 65.3  | 50.0  | 151.0  | 65.5     | 12.0                               | 72.4  | 159.2 | 118.2 | 396.8 | 129.0    | 0.9                       | 0.7 | 0.4 | 0.4 | 0.4  | 0.5      |
|                              | >15                | 14.7                               | 105.5 | 183.3 | 102.7 | 504.0  | 182.0    | 28.2                               | 177.8 | 460.1 | 326.0 | 947.3 | 358.7    | 0.5                       | 0.6 | 0.4 | 0.3 | 0.5  | 0.5      |
|                              | Avg.(BD)           | 13.2                               | 83.4  | 121.8 | 79.4  | 306.6  | 120.9    | 17.9                               | 110.2 | 288.6 | 198.4 | 626.3 | 223.3    | 0.7                       | 0.8 | 0.4 | 0.4 | 0.5  | 0.5      |
| $SF_b(Def)$ /<br>$SF_b(Fol)$ | 5–10               | 1.3                                | 1.0   | 1.3   | 1.1   | 1.0    | 1.2      | 1.3                                | 0.7   | 0.8   | 1.1   | 1.1   | 1.1      | N/A                       | N/A | N/A | N/A | N/A  | N/A      |
|                              | 10–15              | 0.4                                | 0.3   | 0.2   | 0.3   | 0.2    | 0.3      | 1.2                                | 1.1   | 1.1   | 1.0   | 1.1   | 1.0      | N/A                       | N/A | N/A | N/A | N/A  | N/A      |
|                              | >15                | 0.3                                | 0.3   | 0.3   | 0.3   | 0.4    | 0.3      | 1.7                                | 1.6   | 1.6   | 1.2   | 1.3   | 1.4      | N/A                       | N/A | N/A | N/A | N/A  | N/A      |
|                              | Avg.(BD)           | 0.4                                | 0.4   | 0.4   | 0.4   | 0.4    | 0.4      | 1.5                                | 1.3   | 1.5   | 1.1   | 1.3   | 1.3      | N/A                       | N/A | N/A | N/A | N/A  | N/A      |

Note: BD is the branch basal diameter; P is the precipitation amount;  $SF_b(Def)/SF_b(Fol)$  refers to the ratio between branch stemflow volume of the foliated and manually defoliated shrubs; and  $SF_b(SP)/SF_b(CK)$  refers to the ratio between branch stemflow volume of *S. psammophila* and *C. korshinskii*; N/A refers to not applicable.

**Table 4.** Comparison of stemflow productivity (SFP) between the foliated *C. korshinskii* and *S. psammophila*.

| Intra- and inter-specific differences                                              | BD categories (mm) | Precipitation categories (mm) |      |      |       |       |      | Avg.(P) |
|------------------------------------------------------------------------------------|--------------------|-------------------------------|------|------|-------|-------|------|---------|
|                                                                                    |                    | ≤2                            | 2–5  | 5–10 | 10–15 | 15–20 | >20  |         |
| Intra-specific differences in <i>C. korshinskii</i> (CK)<br>(mL g <sup>-1</sup> )  | 5–10               | 0.20                          | 0.56 | 1.37 | 2.04  | 4.18  | 5.60 | 2.19    |
|                                                                                    | 10–15              | 0.19                          | 0.47 | 1.20 | 1.72  | 3.47  | 4.96 | 1.90    |
|                                                                                    | 15–18              | 0.17                          | 0.38 | 1.05 | 1.55  | 3.08  | 4.74 | 1.73    |
|                                                                                    | >18                | 0.15                          | 0.35 | 1.00 | 1.46  | 2.95  | 4.35 | 1.62    |
|                                                                                    | Avg.(BD)           | 0.19                          | 0.47 | 1.21 | 1.78  | 3.60  | 5.08 | 1.95    |
| Intra-specific differences in <i>S. psammophila</i> (SP)<br>(mL g <sup>-1</sup> )  | 5–10               | 0.11                          | 0.34 | 1.10 | 1.83  | 2.51  | 4.59 | 1.64    |
|                                                                                    | 10–15              | 0.08                          | 0.25 | 0.82 | 1.43  | 1.98  | 3.72 | 1.29    |
|                                                                                    | 15–18              | 0.05                          | 0.16 | 0.53 | 0.97  | 1.40  | 2.61 | 0.88    |
|                                                                                    | >18                | 0.05                          | 0.15 | 0.47 | 0.82  | 1.25  | 2.44 | 0.80    |
|                                                                                    | Avg.(BD)           | 0.07                          | 0.23 | 0.76 | 1.31  | 1.84  | 3.43 | 1.19    |
| Inter-specific differences<br>(the ratio of the SFP values<br>of CK to that of SP) | 5–10               | 1.8                           | 1.7  | 1.3  | 1.1   | 1.7   | 1.2  | 1.3     |
|                                                                                    | 10–15              | 2.4                           | 1.9  | 1.5  | 1.2   | 1.8   | 1.3  | 1.5     |
|                                                                                    | 15–18              | 2.8                           | 2.4  | 2.0  | 1.6   | 2.2   | 1.8  | 2.0     |
|                                                                                    | >18                | 3.0                           | 2.3  | 2.1  | 1.8   | 2.4   | 1.8  | 2.0     |
|                                                                                    | Avg.(BD)           | 2.7                           | 2.0  | 1.6  | 1.4   | 2.0   | 1.5  | 1.6     |

Note: BD is the branch basal diameter; P is the precipitation amount; CK and SP are the abbreviations of *C. korshinskii* and *S. psammophila*, respectively.

**Table 5.** Comparison of the funnelling ratio (FR) for the foliated *C. korshinskii* and *S. psammophila*.

| Intra- and inter-specific differences                                       | BA categories (°) | Precipitation categories (mm) |       |       |       |       |       | Avg.(P) |
|-----------------------------------------------------------------------------|-------------------|-------------------------------|-------|-------|-------|-------|-------|---------|
|                                                                             |                   | ≤2                            | 2–5   | 5–10  | 10–15 | 15–20 | >20   |         |
| Intra-specific differences in <i>C. korshinskii</i> (CK)                    | ≤30               | 100.2                         | 127.7 | 168.1 | 125.3 | 193.1 | 170.3 | 149.9   |
|                                                                             | 30–60             | 125.9                         | 133.8 | 178.5 | 157.8 | 205.2 | 182.1 | 164.7   |
|                                                                             | 60–80             | 135.5                         | 148.9 | 192.5 | 165.8 | 217.0 | 188.6 | 176.1   |
|                                                                             | >80               | 133.2                         | 167.4 | 205.5 | 182.6 | 276.0 | 226.1 | 198.2   |
|                                                                             | Avg.(BA)          | 129.2                         | 144.8 | 187.7 | 162.3 | 219.6 | 190.3 | 173.3   |
| Intra-specific differences in <i>S. psammophila</i> (SP)                    | ≤30               | 32.6                          | 37.3  | 52.0  | 59.0  | 65.8  | 85.2  | 55.0    |
|                                                                             | 30–60             | 34.5                          | 43.4  | 65.7  | 70.6  | 77.7  | 92.3  | 64.8    |
|                                                                             | 60–80             | 37.8                          | 47.9  | 78.0  | 78.4  | 82.3  | 97.7  | 72.4    |
|                                                                             | >80               | 44.9                          | 55.0  | 93.5  | 94.7  | 94.1  | 115.7 | 85.6    |
|                                                                             | Avg.(BA)          | 36.7                          | 46.0  | 72.6  | 75.3  | 80.5  | 96.1  | 69.3    |
| Inter-specific differences (the ratio of the FR values of CK to that of SP) | ≤30               | 3.1                           | 3.4   | 3.2   | 2.1   | 2.9   | 2.0   | 2.7     |
|                                                                             | 30–60             | 3.7                           | 3.1   | 2.7   | 2.2   | 2.6   | 2.0   | 2.5     |
|                                                                             | 60–80             | 3.6                           | 3.1   | 2.5   | 2.1   | 2.6   | 1.9   | 2.4     |
|                                                                             | >80               | 3.0                           | 3.0   | 2.2   | 1.9   | 2.9   | 2.0   | 2.3     |
|                                                                             | Avg.(BA)          | 3.5                           | 3.2   | 2.6   | 2.2   | 2.7   | 2.0   | 2.5     |

Note: BA is the branch inclined angle; P is the precipitation amount; CK and SP are the abbreviations of *C. korshinskii* and *S. psammophila*, respectively.

933 **Figure captions**

934

935 **Fig. 1.** Location of the experimental stands and facilities for stemflow measurements of *C.*  
936 *korshinskii* and *S. psammophila* at the Liudaogou catchment in the Loess Plateau of  
937 China.

938

939 **Fig. 2.** The controlled experiment for stemflow yield between the foliated and manually  
940 defoliated shrubs.

941

942 **Fig. 3.** Meteorological characteristics of rainfall events for stemflow measurements during the  
943 2014 and 2015 rainy seasons.

944

945 **Fig. 4.** Verification of the allometric models for estimating the biomass and leaf traits of *C.*  
946 *korshinskii*. BML and BMS refer to the biomass of the leaves and stems, respectively,  
947 and LAB and LNB refer to the leaf area and the number of branches, respectively.

948

949 **Fig. 5.** Relationships of branch stemflow volume ( $SF_b$ ), shrub stemflow depth ( $SF_d$ ) and  
950 stemflow percentage ( $SF\%$ ) with precipitation amount (P) for *C. korshinskii* and *S.*  
951 *psammophila*.

952

953 **Fig. 6.** Comparison of leaf morphologies of *C. korshinskii* and *S. psammophila*.

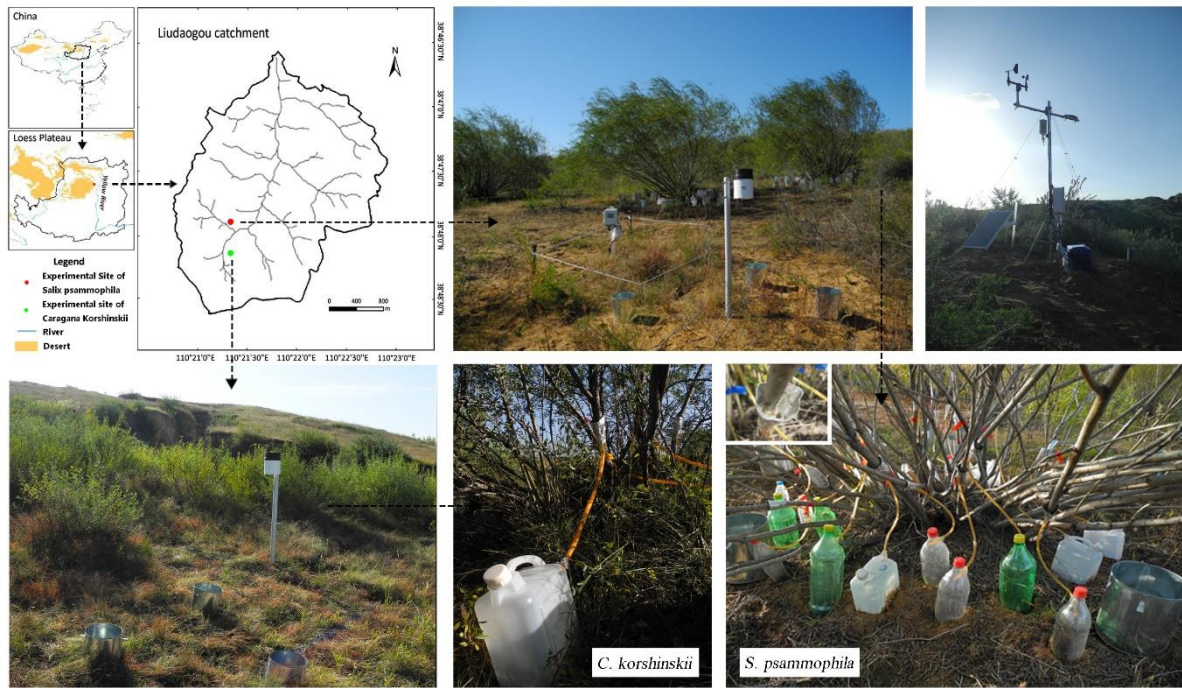

954

955

956

**Fig. 1.** Location of the experimental stands and facilities for stemflow measurements of *C. korshinskii* and *S. psammophila* at the Liudaogou catchment in the Loess Plateau of China.

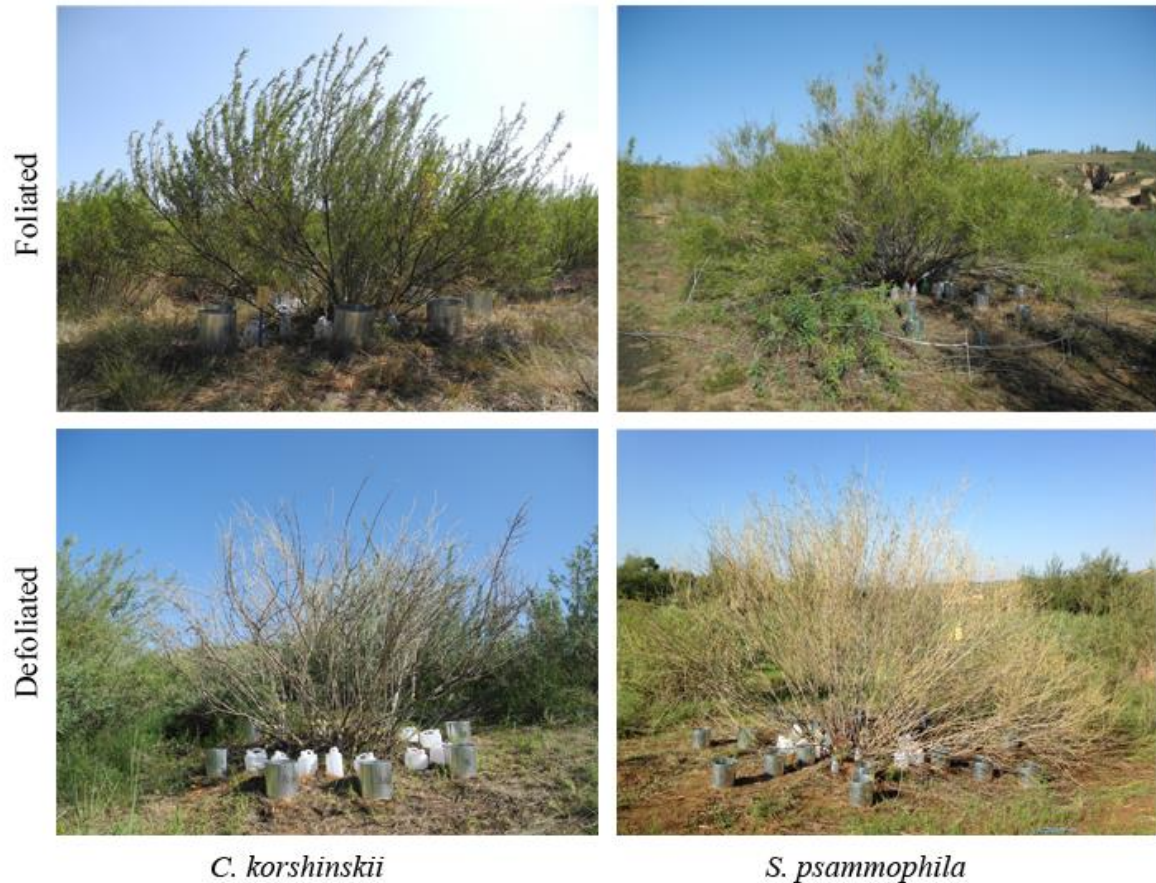

957  
958  
959

**Fig. 2.** The controlled experiment for stemflow yield between the foliated and manually defoliated shrubs.

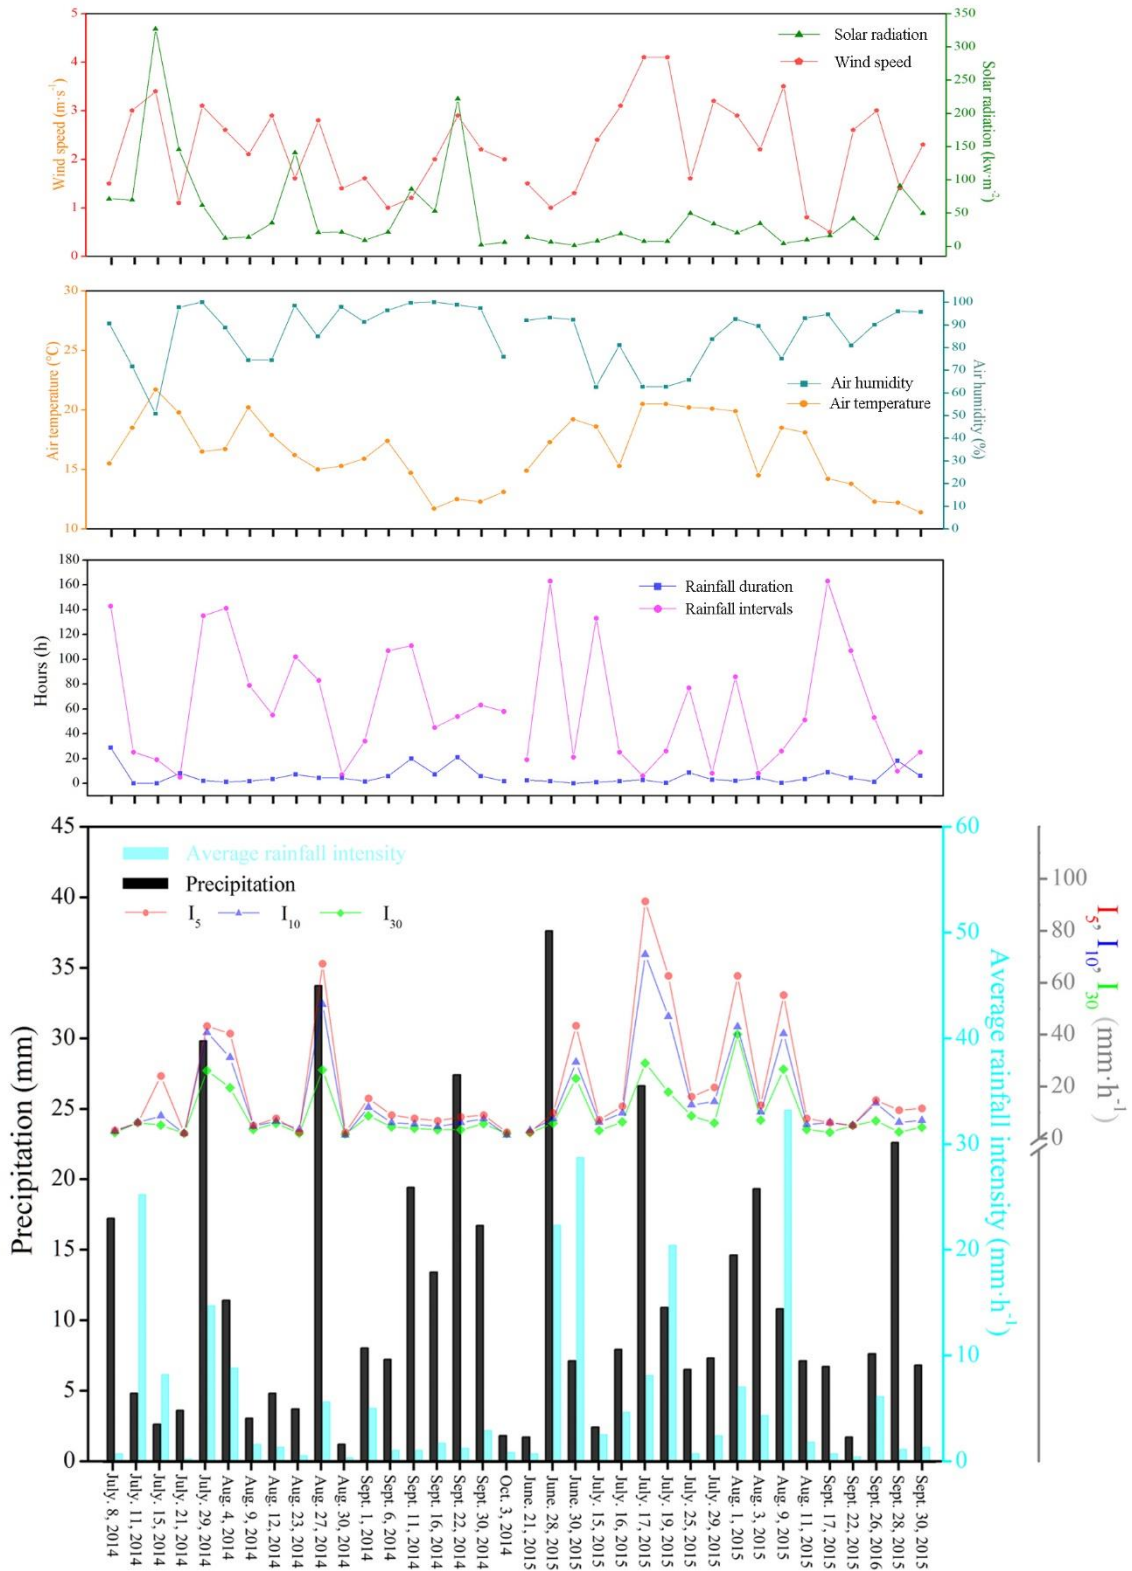

960

961 **Fig. 3.** Meteorological characteristics of rainfall events for stemflow measurements during the

962 2014 and 2015 rainy seasons.

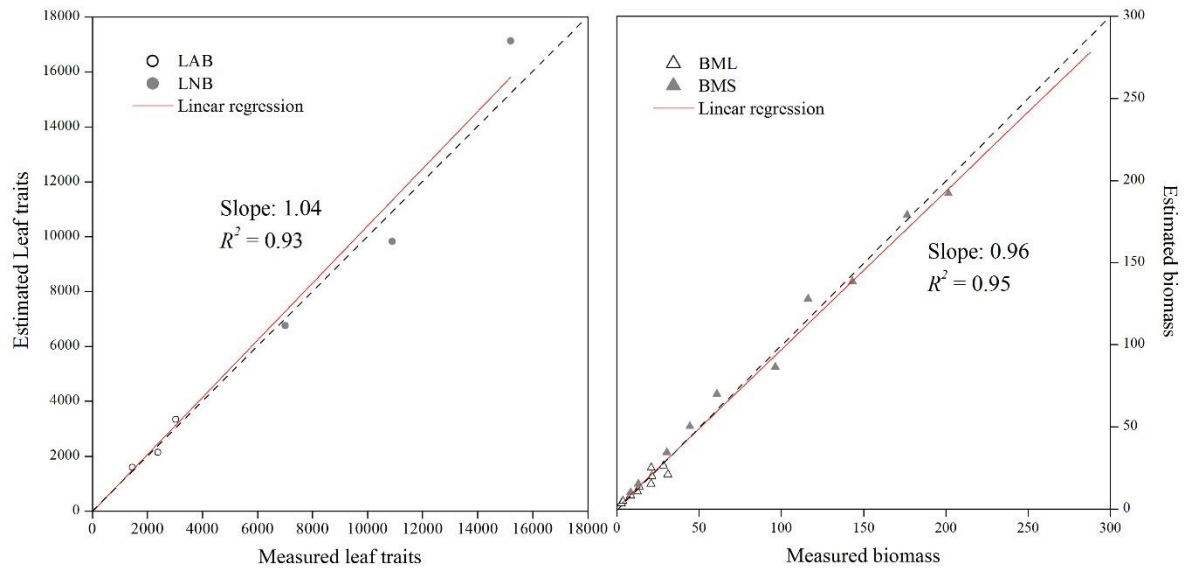

963

964 **Fig. 4.** Verification of the allometric models for estimating the biomass and leaf traits of *C.*  
 965 *korshinskii*. BML and BMS refer to the biomass of the leaves and stems, respectively, and  
 966 LAB and LNB refer to the leaf area and the number of branches, respectively.





967

968 **Fig. 5.** Relationships of branch stemflow volume ( $SF_b$ ), shrub stemflow depth ( $SF_d$ ) and  
 969 stemflow percentage ( $SF\%$ ) with precipitation amount (P) for *C. korshinskii* and *S.*  
 970 *psammophila*.

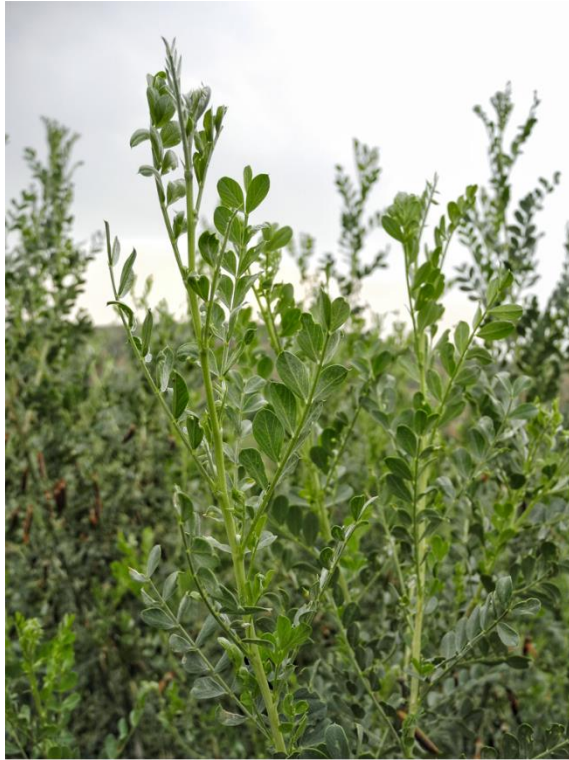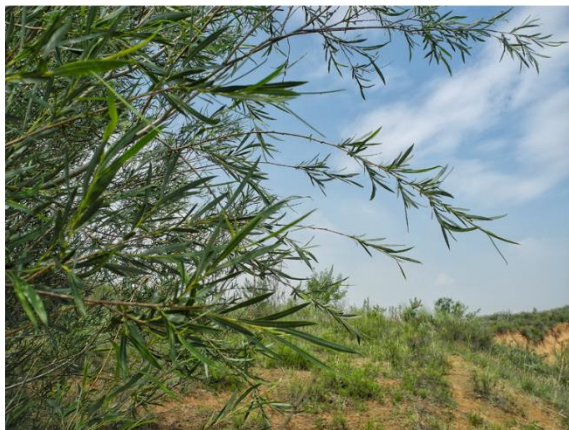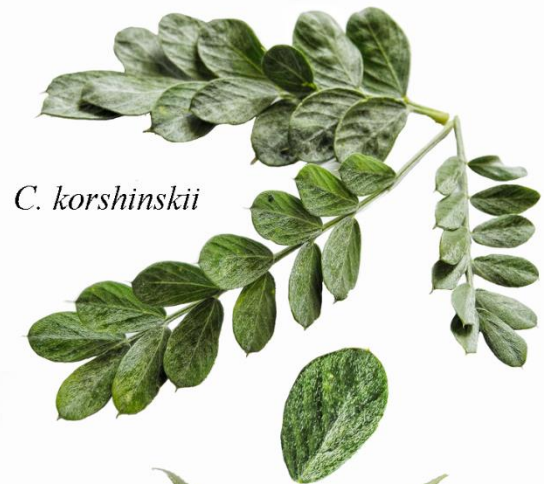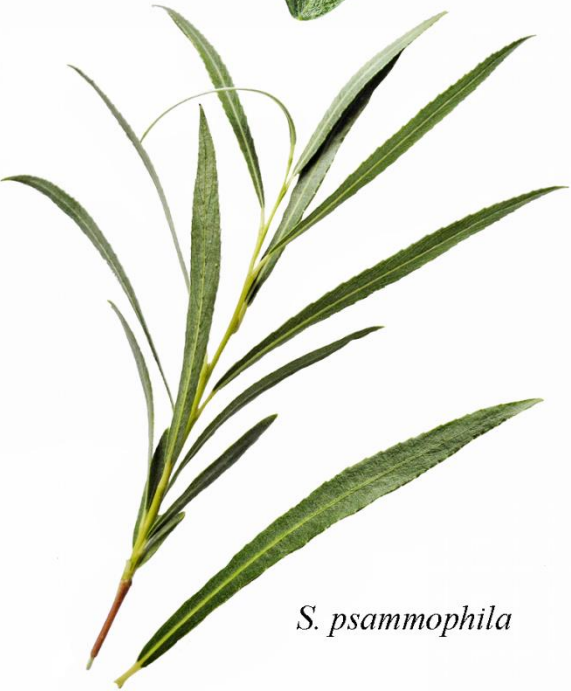

*C. korshinskii*

*S. psammophila*

971

972

**Fig. 6.** Comparison of leaf morphologies of *C. korshinskii* and *S. psammophila*
